# Supplementary material for: Analysis of photocatalytic CO2 reduction over MOFs using machine learning
Source: Royal Society of Chemistry journal article supplement (doi:10.1039/d3ta07001h), 2024-01-01
Supplement: d3ta07001h1.xlsx [file d3ta07001h1.xlsx]

## Sheet: Sheet1
MLA Reference	No	Exp	Photocatalyst(s)	MOF_Type	Phase	Center_Metal	Noble_Metal	NH2	Additional	Band_gap	CatperVol	SacrAgentPercent	Light	Reactor_Volume	Rxn_Time	Rxn_Pressure	Rxn_Temp	Synhesis_Temp	Synthesis_Time	total	MAJORgas
Wang, Jichong, et al. "Direct Z-scheme 0D/2D heterojunction of CsPbBr3 quantum dots/Bi2WO6 nanosheets for efficient photocatalytic CO2 reduction." ACS applied materials & interfaces 12.28 (2020): 31477-31485.	1	1	CsPbBr3	COMP	Gas	none	none	none	none	2.36		0	VIS		10		25	150	1	6	CO
Wang, Jichong, et al. "Direct Z-scheme 0D/2D heterojunction of CsPbBr3 quantum dots/Bi2WO6 nanosheets for efficient photocatalytic CO2 reduction." ACS applied materials & interfaces 12.28 (2020): 31477-31485.	2	2	CPB/BWO	COMP	Gas	none	none	none	Bi2WO6	2.36		0	VIS		10		25	50	2	50.5	CO
Wang, Jichong, et al. "Direct Z-scheme 0D/2D heterojunction of CsPbBr3 quantum dots/Bi2WO6 nanosheets for efficient photocatalytic CO2 reduction." ACS applied materials & interfaces 12.28 (2020): 31477-31485.	3	3	CBP/BWO-1	COMP	Gas	none	none	none	Bi2WO6	2.36		0	VIS		10		25	50	2	30	CO
Wang, Jichong, et al. "Direct Z-scheme 0D/2D heterojunction of CsPbBr3 quantum dots/Bi2WO6 nanosheets for efficient photocatalytic CO2 reduction." ACS applied materials & interfaces 12.28 (2020): 31477-31485.	4	4	CBP/BWO-2	COMP	Gas	none	none	none	Bi2WO6	2.36		0	VIS		10		25	50	2	35	CO
Liu, Qi, et al. "ZIF-8/Zn 2 GeO 4 nanorods with an enhanced CO 2 adsorption property in an aqueous medium for photocatalytic synthesis of liquid fuel." Journal of Materials Chemistry A 1.38 (2013): 11563-11569.	5	5	Zn2GeO4 nanorods	COMP	Liquid	none	none	none	Zn2GeO4		2	0	UVVIS		10	1		180	12	0.13	CH3OH
Liu, Qi, et al. "ZIF-8/Zn 2 GeO 4 nanorods with an enhanced CO 2 adsorption property in an aqueous medium for photocatalytic synthesis of liquid fuel." Journal of Materials Chemistry A 1.38 (2013): 11563-11569.	6	5	Zn2GeO4 nanorods	COMP	Liquid	none	none	none	Zn2GeO4		2	0	UVVIS		9	1		180	12	0.163778	CH3OH
Liu, Qi, et al. "ZIF-8/Zn 2 GeO 4 nanorods with an enhanced CO 2 adsorption property in an aqueous medium for photocatalytic synthesis of liquid fuel." Journal of Materials Chemistry A 1.38 (2013): 11563-11569.	7	5	Zn2GeO4 nanorods	COMP	Liquid	none	none	none	Zn2GeO4		2	0	UVVIS		8	1		180	12	0.182625	CH3OH
Liu, Qi, et al. "ZIF-8/Zn 2 GeO 4 nanorods with an enhanced CO 2 adsorption property in an aqueous medium for photocatalytic synthesis of liquid fuel." Journal of Materials Chemistry A 1.38 (2013): 11563-11569.	8	5	Zn2GeO4 nanorods	COMP	Liquid	none	none	none	Zn2GeO4		2	0	UVVIS		7	1		180	12	0.205429	CH3OH
Liu, Qi, et al. "ZIF-8/Zn 2 GeO 4 nanorods with an enhanced CO 2 adsorption property in an aqueous medium for photocatalytic synthesis of liquid fuel." Journal of Materials Chemistry A 1.38 (2013): 11563-11569.	9	5	Zn2GeO4 nanorods	COMP	Liquid	none	none	none	Zn2GeO4		2	0	UVVIS		6	1		180	12	0.235833	CH3OH
Liu, Qi, et al. "ZIF-8/Zn 2 GeO 4 nanorods with an enhanced CO 2 adsorption property in an aqueous medium for photocatalytic synthesis of liquid fuel." Journal of Materials Chemistry A 1.38 (2013): 11563-11569.	10	5	Zn2GeO4 nanorods	COMP	Liquid	none	none	none	Zn2GeO4		2	0	UVVIS		5	1		180	12	0.274	CH3OH
Liu, Qi, et al. "ZIF-8/Zn 2 GeO 4 nanorods with an enhanced CO 2 adsorption property in an aqueous medium for photocatalytic synthesis of liquid fuel." Journal of Materials Chemistry A 1.38 (2013): 11563-11569.	11	5	Zn2GeO4 nanorods	COMP	Liquid	none	none	none	Zn2GeO4		2	0	UVVIS		4	1		180	12	0.33	CH3OH
Liu, Qi, et al. "ZIF-8/Zn 2 GeO 4 nanorods with an enhanced CO 2 adsorption property in an aqueous medium for photocatalytic synthesis of liquid fuel." Journal of Materials Chemistry A 1.38 (2013): 11563-11569.	12	5	Zn2GeO4 nanorods	COMP	Liquid	none	none	none	Zn2GeO4		2	0	UVVIS		3	1		180	12	0.386667	CH3OH
Liu, Qi, et al. "ZIF-8/Zn 2 GeO 4 nanorods with an enhanced CO 2 adsorption property in an aqueous medium for photocatalytic synthesis of liquid fuel." Journal of Materials Chemistry A 1.38 (2013): 11563-11569.	13	5	Zn2GeO4 nanorods	COMP	Liquid	none	none	none	Zn2GeO4		2	0	UVVIS		2	1		180	12	0.4575	CH3OH
Liu, Qi, et al. "ZIF-8/Zn 2 GeO 4 nanorods with an enhanced CO 2 adsorption property in an aqueous medium for photocatalytic synthesis of liquid fuel." Journal of Materials Chemistry A 1.38 (2013): 11563-11569.	14	5	Zn2GeO4 nanorods	COMP	Liquid	none	none	none	Zn2GeO4		2	0	UVVIS		1	1		180	12	0.724	CH3OH
Liu, Qi, et al. "ZIF-8/Zn 2 GeO 4 nanorods with an enhanced CO 2 adsorption property in an aqueous medium for photocatalytic synthesis of liquid fuel." Journal of Materials Chemistry A 1.38 (2013): 11563-11569.	15	6	Zn2GeO4/ZIF-8 nanorods	COMP	Liquid	Zn	none	none	Zn2GeO4		2	0	UVVIS		11	1		60	12	0.22	CH3OH
Liu, Qi, et al. "ZIF-8/Zn 2 GeO 4 nanorods with an enhanced CO 2 adsorption property in an aqueous medium for photocatalytic synthesis of liquid fuel." Journal of Materials Chemistry A 1.38 (2013): 11563-11569.	16	6	Zn2GeO4/ZIF-8 nanorods	COMP	Liquid	Zn	none	none	Zn2GeO4		2	0	UVVIS		10	1		60	12	0.2321	CH3OH
Liu, Qi, et al. "ZIF-8/Zn 2 GeO 4 nanorods with an enhanced CO 2 adsorption property in an aqueous medium for photocatalytic synthesis of liquid fuel." Journal of Materials Chemistry A 1.38 (2013): 11563-11569.	17	6	Zn2GeO4/ZIF-8 nanorods	COMP	Liquid	Zn	none	none	Zn2GeO4		2	0	UVVIS		9	1		60	12	0.241667	CH3OH
Liu, Qi, et al. "ZIF-8/Zn 2 GeO 4 nanorods with an enhanced CO 2 adsorption property in an aqueous medium for photocatalytic synthesis of liquid fuel." Journal of Materials Chemistry A 1.38 (2013): 11563-11569.	18	6	Zn2GeO4/ZIF-8 nanorods	COMP	Liquid	Zn	none	none	Zn2GeO4		2	0	UVVIS		8	1		60	12	0.252	CH3OH
Liu, Qi, et al. "ZIF-8/Zn 2 GeO 4 nanorods with an enhanced CO 2 adsorption property in an aqueous medium for photocatalytic synthesis of liquid fuel." Journal of Materials Chemistry A 1.38 (2013): 11563-11569.	19	6	Zn2GeO4/ZIF-8 nanorods	COMP	Liquid	Zn	none	none	Zn2GeO4		2	0	UVVIS		7	1		60	12	0.272429	CH3OH
Liu, Qi, et al. "ZIF-8/Zn 2 GeO 4 nanorods with an enhanced CO 2 adsorption property in an aqueous medium for photocatalytic synthesis of liquid fuel." Journal of Materials Chemistry A 1.38 (2013): 11563-11569.	20	6	Zn2GeO4/ZIF-8 nanorods	COMP	Liquid	Zn	none	none	Zn2GeO4		2	0	UVVIS		6	1		60	12	0.295833	CH3OH
Liu, Qi, et al. "ZIF-8/Zn 2 GeO 4 nanorods with an enhanced CO 2 adsorption property in an aqueous medium for photocatalytic synthesis of liquid fuel." Journal of Materials Chemistry A 1.38 (2013): 11563-11569.	21	6	Zn2GeO4/ZIF-8 nanorods	COMP	Liquid	Zn	none	none	Zn2GeO4		2	0	UVVIS		5	1		60	12	0.3276	CH3OH
Liu, Qi, et al. "ZIF-8/Zn 2 GeO 4 nanorods with an enhanced CO 2 adsorption property in an aqueous medium for photocatalytic synthesis of liquid fuel." Journal of Materials Chemistry A 1.38 (2013): 11563-11569.	22	6	Zn2GeO4/ZIF-8 nanorods	COMP	Liquid	Zn	none	none	Zn2GeO4		2	0	UVVIS		4	1		60	12	0.39025	CH3OH
Liu, Qi, et al. "ZIF-8/Zn 2 GeO 4 nanorods with an enhanced CO 2 adsorption property in an aqueous medium for photocatalytic synthesis of liquid fuel." Journal of Materials Chemistry A 1.38 (2013): 11563-11569.	23	6	Zn2GeO4/ZIF-8 nanorods	COMP	Liquid	Zn	none	none	Zn2GeO4		2	0	UVVIS		3	1		60	12	0.500667	CH3OH
Liu, Qi, et al. "ZIF-8/Zn 2 GeO 4 nanorods with an enhanced CO 2 adsorption property in an aqueous medium for photocatalytic synthesis of liquid fuel." Journal of Materials Chemistry A 1.38 (2013): 11563-11569.	24	6	Zn2GeO4/ZIF-8 nanorods	COMP	Liquid	Zn	none	none	Zn2GeO4		2	0	UVVIS		2	1		60	12	0.6485	CH3OH
Liu, Qi, et al. "ZIF-8/Zn 2 GeO 4 nanorods with an enhanced CO 2 adsorption property in an aqueous medium for photocatalytic synthesis of liquid fuel." Journal of Materials Chemistry A 1.38 (2013): 11563-11569.	25	6	Zn2GeO4/ZIF-8 nanorods	COMP	Liquid	Zn	none	none	Zn2GeO4		2	0	UVVIS		1	1		60	12	0.828	CH3OH
Liu, Qi, et al. "ZIF-8/Zn 2 GeO 4 nanorods with an enhanced CO 2 adsorption property in an aqueous medium for photocatalytic synthesis of liquid fuel." Journal of Materials Chemistry A 1.38 (2013): 11563-11569.	26	7	1 wt% Pt-Zn2GeO4/ZIF-8 nanorods	COMP	Liquid	Zn	present	none	Zn2GeO4		2	0	UVVIS		11	1		60	12	0.256	CH3OH
Liu, Qi, et al. "ZIF-8/Zn 2 GeO 4 nanorods with an enhanced CO 2 adsorption property in an aqueous medium for photocatalytic synthesis of liquid fuel." Journal of Materials Chemistry A 1.38 (2013): 11563-11569.	27	7	1 wt% Pt-Zn2GeO4/ZIF-8 nanorods	COMP	Liquid	Zn	present	none	Zn2GeO4		2	0	UVVIS		10	1		60	12	0.2844	CH3OH
Liu, Qi, et al. "ZIF-8/Zn 2 GeO 4 nanorods with an enhanced CO 2 adsorption property in an aqueous medium for photocatalytic synthesis of liquid fuel." Journal of Materials Chemistry A 1.38 (2013): 11563-11569.	28	7	1 wt% Pt-Zn2GeO4/ZIF-8 nanorods	COMP	Liquid	Zn	present	none	Zn2GeO4		2	0	UVVIS		9	1		60	12	0.318556	CH3OH
Liu, Qi, et al. "ZIF-8/Zn 2 GeO 4 nanorods with an enhanced CO 2 adsorption property in an aqueous medium for photocatalytic synthesis of liquid fuel." Journal of Materials Chemistry A 1.38 (2013): 11563-11569.	29	7	1 wt% Pt-Zn2GeO4/ZIF-8 nanorods	COMP	Liquid	Zn	present	none	Zn2GeO4		2	0	UVVIS		8	1		60	12	0.350375	CH3OH
Liu, Qi, et al. "ZIF-8/Zn 2 GeO 4 nanorods with an enhanced CO 2 adsorption property in an aqueous medium for photocatalytic synthesis of liquid fuel." Journal of Materials Chemistry A 1.38 (2013): 11563-11569.	30	7	1 wt% Pt-Zn2GeO4/ZIF-8 nanorods	COMP	Liquid	Zn	present	none	Zn2GeO4		2	0	UVVIS		7	1		60	12	0.367286	CH3OH
Liu, Qi, et al. "ZIF-8/Zn 2 GeO 4 nanorods with an enhanced CO 2 adsorption property in an aqueous medium for photocatalytic synthesis of liquid fuel." Journal of Materials Chemistry A 1.38 (2013): 11563-11569.	31	7	1 wt% Pt-Zn2GeO4/ZIF-8 nanorods	COMP	Liquid	Zn	present	none	Zn2GeO4		2	0	UVVIS		6	1		60	12	0.414167	CH3OH
Liu, Qi, et al. "ZIF-8/Zn 2 GeO 4 nanorods with an enhanced CO 2 adsorption property in an aqueous medium for photocatalytic synthesis of liquid fuel." Journal of Materials Chemistry A 1.38 (2013): 11563-11569.	32	7	1 wt% Pt-Zn2GeO4/ZIF-8 nanorods	COMP	Liquid	Zn	present	none	Zn2GeO4		2	0	UVVIS		5	1		60	12	0.436	CH3OH
Liu, Qi, et al. "ZIF-8/Zn 2 GeO 4 nanorods with an enhanced CO 2 adsorption property in an aqueous medium for photocatalytic synthesis of liquid fuel." Journal of Materials Chemistry A 1.38 (2013): 11563-11569.	33	7	1 wt% Pt-Zn2GeO4/ZIF-8 nanorods	COMP	Liquid	Zn	present	none	Zn2GeO4		2	0	UVVIS		4	1		60	12	0.5085	CH3OH
Liu, Qi, et al. "ZIF-8/Zn 2 GeO 4 nanorods with an enhanced CO 2 adsorption property in an aqueous medium for photocatalytic synthesis of liquid fuel." Journal of Materials Chemistry A 1.38 (2013): 11563-11569.	34	7	1 wt% Pt-Zn2GeO4/ZIF-8 nanorods	COMP	Liquid	Zn	present	none	Zn2GeO4		2	0	UVVIS		3	1		60	12	0.605333	CH3OH
Liu, Qi, et al. "ZIF-8/Zn 2 GeO 4 nanorods with an enhanced CO 2 adsorption property in an aqueous medium for photocatalytic synthesis of liquid fuel." Journal of Materials Chemistry A 1.38 (2013): 11563-11569.	35	7	1 wt% Pt-Zn2GeO4/ZIF-8 nanorods	COMP	Liquid	Zn	present	none	Zn2GeO4		2	0	UVVIS		2	1		60	12	0.7215	CH3OH
Liu, Qi, et al. "ZIF-8/Zn 2 GeO 4 nanorods with an enhanced CO 2 adsorption property in an aqueous medium for photocatalytic synthesis of liquid fuel." Journal of Materials Chemistry A 1.38 (2013): 11563-11569.	36	7	1 wt% Pt-Zn2GeO4/ZIF-8 nanorods	COMP	Liquid	Zn	present	none	Zn2GeO4		2	0	UVVIS		1	1		60	12	1.092	CH3OH
Shi, Li, et al. "Electrostatic self‐assembly of nanosized carbon nitride nanosheet onto a zirconium metal–organic framework for enhanced photocatalytic CO2 reduction." Advanced functional materials 25.33 (2015): 5360-5367.	37	8	UiO-66/bulk CN	COMP	Liquid	Zr	none	none	CN	3.5	20	20	VIS	330	6	0.8	200	120	48	3.212	CO
Shi, Li, et al. "Electrostatic self‐assembly of nanosized carbon nitride nanosheet onto a zirconium metal–organic framework for enhanced photocatalytic CO2 reduction." Advanced functional materials 25.33 (2015): 5360-5367.	38	8	UiO-66/bulk CN	COMP	Liquid	Zr	none	none	CN	3.5	20	20	VIS	330	5	0.8	200	120	48	3.3638	CO
Shi, Li, et al. "Electrostatic self‐assembly of nanosized carbon nitride nanosheet onto a zirconium metal–organic framework for enhanced photocatalytic CO2 reduction." Advanced functional materials 25.33 (2015): 5360-5367.	39	8	UiO-66/bulk CN	COMP	Liquid	Zr	none	none	CN	3.5	20	20	VIS	330	4	0.8	200	120	48	3.54775	CO
Shi, Li, et al. "Electrostatic self‐assembly of nanosized carbon nitride nanosheet onto a zirconium metal–organic framework for enhanced photocatalytic CO2 reduction." Advanced functional materials 25.33 (2015): 5360-5367.	40	8	UiO-66/bulk CN	COMP	Liquid	Zr	none	none	CN	3.5	20	20	VIS	330	3	0.8	200	120	48	3.621	CO
Shi, Li, et al. "Electrostatic self‐assembly of nanosized carbon nitride nanosheet onto a zirconium metal–organic framework for enhanced photocatalytic CO2 reduction." Advanced functional materials 25.33 (2015): 5360-5367.	41	8	UiO-66/bulk CN	COMP	Liquid	Zr	none	none	CN	3.5	20	20	VIS	330	2	0.8	200	120	48	4.7305	CO
Shi, Li, et al. "Electrostatic self‐assembly of nanosized carbon nitride nanosheet onto a zirconium metal–organic framework for enhanced photocatalytic CO2 reduction." Advanced functional materials 25.33 (2015): 5360-5367.	42	8	UiO-66/bulk CN	COMP	Liquid	Zr	none	none	CN	3.5	20	20	VIS	330	1	0.8	200	120	48	6.658	CO
Shi, Li, et al. "Electrostatic self‐assembly of nanosized carbon nitride nanosheet onto a zirconium metal–organic framework for enhanced photocatalytic CO2 reduction." Advanced functional materials 25.33 (2015): 5360-5367.	43	9	Bulk CN	COMP	Liquid	none	none	none	CN	2.63	200.2	20	VIS	330	6	0.8	200			1.92717	CO
Shi, Li, et al. "Electrostatic self‐assembly of nanosized carbon nitride nanosheet onto a zirconium metal–organic framework for enhanced photocatalytic CO2 reduction." Advanced functional materials 25.33 (2015): 5360-5367.	44	9	Bulk CN	COMP	Liquid	none	none	none	CN	2.63	200.2	20	VIS	330	5	0.8	200			2.409	CO
Shi, Li, et al. "Electrostatic self‐assembly of nanosized carbon nitride nanosheet onto a zirconium metal–organic framework for enhanced photocatalytic CO2 reduction." Advanced functional materials 25.33 (2015): 5360-5367.	45	9	Bulk CN	COMP	Liquid	none	none	none	CN	2.63	200.2	20	VIS	330	4	0.8	200			2.05875	CO
Shi, Li, et al. "Electrostatic self‐assembly of nanosized carbon nitride nanosheet onto a zirconium metal–organic framework for enhanced photocatalytic CO2 reduction." Advanced functional materials 25.33 (2015): 5360-5367.	46	9	Bulk CN	COMP	Liquid	none	none	none	CN	2.63	200.2	20	VIS	330	3	0.8	200			2.10233	CO
Shi, Li, et al. "Electrostatic self‐assembly of nanosized carbon nitride nanosheet onto a zirconium metal–organic framework for enhanced photocatalytic CO2 reduction." Advanced functional materials 25.33 (2015): 5360-5367.	47	9	Bulk CN	COMP	Liquid	none	none	none	CN	2.63	200.2	20	VIS	330	2	0.8	200			2.365	CO
Shi, Li, et al. "Electrostatic self‐assembly of nanosized carbon nitride nanosheet onto a zirconium metal–organic framework for enhanced photocatalytic CO2 reduction." Advanced functional materials 25.33 (2015): 5360-5367.	48	9	Bulk CN	COMP	Liquid	none	none	none	CN	2.63	200.2	20	VIS	330	1	0.8	200			2.628	CO
Shi, Li, et al. "Electrostatic self‐assembly of nanosized carbon nitride nanosheet onto a zirconium metal–organic framework for enhanced photocatalytic CO2 reduction." Advanced functional materials 25.33 (2015): 5360-5367.	49	10	UiO-66/CNNS	COMP	Liquid	Zr	none	none	CNNs		20	20	VIS	330	6	0.8	200	120	48	9.899	CO
Shi, Li, et al. "Electrostatic self‐assembly of nanosized carbon nitride nanosheet onto a zirconium metal–organic framework for enhanced photocatalytic CO2 reduction." Advanced functional materials 25.33 (2015): 5360-5367.	50	10	UiO-66/CNNS	COMP	Liquid	Zr	none	none	CNNs		20	20	VIS	330	5	0.8	200	120	48	10.1266	CO
Shi, Li, et al. "Electrostatic self‐assembly of nanosized carbon nitride nanosheet onto a zirconium metal–organic framework for enhanced photocatalytic CO2 reduction." Advanced functional materials 25.33 (2015): 5360-5367.	51	10	UiO-66/CNNS	COMP	Liquid	Zr	none	none	CNNs		20	20	VIS	330	4	0.8	200	120	48	10.8625	CO
Shi, Li, et al. "Electrostatic self‐assembly of nanosized carbon nitride nanosheet onto a zirconium metal–organic framework for enhanced photocatalytic CO2 reduction." Advanced functional materials 25.33 (2015): 5360-5367.	52	10	UiO-66/CNNS	COMP	Liquid	Zr	none	none	CNNs		20	20	VIS	330	3	0.8	200	120	48	11.68	CO
Shi, Li, et al. "Electrostatic self‐assembly of nanosized carbon nitride nanosheet onto a zirconium metal–organic framework for enhanced photocatalytic CO2 reduction." Advanced functional materials 25.33 (2015): 5360-5367.	53	10	UiO-66/CNNS	COMP	Liquid	Zr	none	none	CNNs		20	20	VIS	330	2	0.8	200	120	48	13.578	CO
Shi, Li, et al. "Electrostatic self‐assembly of nanosized carbon nitride nanosheet onto a zirconium metal–organic framework for enhanced photocatalytic CO2 reduction." Advanced functional materials 25.33 (2015): 5360-5367.	54	10	UiO-66/CNNS	COMP	Liquid	Zr	none	none	CNNs		20	20	VIS	330	1	0.8	200	120	48	16.995	CO
Shi, Li, et al. "Electrostatic self‐assembly of nanosized carbon nitride nanosheet onto a zirconium metal–organic framework for enhanced photocatalytic CO2 reduction." Advanced functional materials 25.33 (2015): 5360-5367.	55	11	CNNs	COMP	Liquid	none	none	none	CNNs	2.78	20	20	VIS	330	6	0.8	200			2.774	CO
Shi, Li, et al. "Electrostatic self‐assembly of nanosized carbon nitride nanosheet onto a zirconium metal–organic framework for enhanced photocatalytic CO2 reduction." Advanced functional materials 25.33 (2015): 5360-5367.	56	11	CNNs	COMP	Liquid	none	none	none	CNNs	2.78	20	20	VIS	330	5	0.8	200			2.9434	CO
Shi, Li, et al. "Electrostatic self‐assembly of nanosized carbon nitride nanosheet onto a zirconium metal–organic framework for enhanced photocatalytic CO2 reduction." Advanced functional materials 25.33 (2015): 5360-5367.	57	11	CNNs	COMP	Liquid	none	none	none	CNNs	2.78	20	20	VIS	330	4	0.8	200			3.066	CO
Shi, Li, et al. "Electrostatic self‐assembly of nanosized carbon nitride nanosheet onto a zirconium metal–organic framework for enhanced photocatalytic CO2 reduction." Advanced functional materials 25.33 (2015): 5360-5367.	58	11	CNNs	COMP	Liquid	none	none	none	CNNs	2.78	20	20	VIS	330	3	0.8	200			5.957	CO
Shi, Li, et al. "Electrostatic self‐assembly of nanosized carbon nitride nanosheet onto a zirconium metal–organic framework for enhanced photocatalytic CO2 reduction." Advanced functional materials 25.33 (2015): 5360-5367.	59	11	CNNs	COMP	Liquid	none	none	none	CNNs	2.78	20	20	VIS	330	2	0.8	200			3.679	CO
Shi, Li, et al. "Electrostatic self‐assembly of nanosized carbon nitride nanosheet onto a zirconium metal–organic framework for enhanced photocatalytic CO2 reduction." Advanced functional materials 25.33 (2015): 5360-5367.	60	11	CNNs	COMP	Liquid	none	none	none	CNNs	2.78	20	20	VIS	330	1	0.8	200			4.205	CO
Shi, Li, et al. "Electrostatic self‐assembly of nanosized carbon nitride nanosheet onto a zirconium metal–organic framework for enhanced photocatalytic CO2 reduction." Advanced functional materials 25.33 (2015): 5360-5367.	61	12	UiO-66/CNNS	COMP	Liquid	Zr	none	none	CNNs		20	20	VIS	330	6	0.8	200	120	48	0.739333	CO
Shi, Li, et al. "Electrostatic self‐assembly of nanosized carbon nitride nanosheet onto a zirconium metal–organic framework for enhanced photocatalytic CO2 reduction." Advanced functional materials 25.33 (2015): 5360-5367.	62	12	UiO-66/CNNS	COMP	Liquid	Zr	none	none	CNNs		20	20	VIS	330	5	0.8	200	120	48	0.9066	CO
Shi, Li, et al. "Electrostatic self‐assembly of nanosized carbon nitride nanosheet onto a zirconium metal–organic framework for enhanced photocatalytic CO2 reduction." Advanced functional materials 25.33 (2015): 5360-5367.	63	12	UiO-66/CNNS	COMP	Liquid	Zr	none	none	CNNs		20	20	VIS	330	4	0.8	200	120	48	0.9885	CO
Shi, Li, et al. "Electrostatic self‐assembly of nanosized carbon nitride nanosheet onto a zirconium metal–organic framework for enhanced photocatalytic CO2 reduction." Advanced functional materials 25.33 (2015): 5360-5367.	64	12	UiO-66/CNNS	COMP	Liquid	Zr	none	none	CNNs		20	20	VIS	330	3	0.8	200	120	48	0.610667	CO
Shi, Li, et al. "Electrostatic self‐assembly of nanosized carbon nitride nanosheet onto a zirconium metal–organic framework for enhanced photocatalytic CO2 reduction." Advanced functional materials 25.33 (2015): 5360-5367.	65	12	UiO-66/CNNS	COMP	Liquid	Zr	none	none	CNNs		20	20	VIS	330	2	0.8	200	120	48	1.0125	CO
Shi, Li, et al. "Electrostatic self‐assembly of nanosized carbon nitride nanosheet onto a zirconium metal–organic framework for enhanced photocatalytic CO2 reduction." Advanced functional materials 25.33 (2015): 5360-5367.	66	12	UiO-66/CNNS	COMP	Liquid	Zr	none	none	CNNs		20	20	VIS	330	1	0.8	200	120	48	1.254	CO
Lee, Yeob, et al. "Photocatalytic CO 2 reduction using visible light by metal-monocatecholato species in a metal–organic framework." Chemical Communications 51.92 (2015): 16549-16552.	67	13	UiO-66-Cr CAT	FUNC	Liquid	Zr	none	none	metal		1	20	VIS		6	1		120	24	1724	HCOOH
Lee, Yeob, et al. "Photocatalytic CO 2 reduction using visible light by metal-monocatecholato species in a metal–organic framework." Chemical Communications 51.92 (2015): 16549-16552.	68	14	UiO-66-Ga CAT	FUNC	Liquid	Zr	none	none	metal		1	20	VIS		6	1		120	24	959	HCOOH
Wang, Xiaojun, et al. "Microwave irradiation induced UIO-66-NH2 anchored on graphene with high activity for photocatalytic reduction of CO2." Applied Catalysis B: Environmental 228 (2018): 47-53.	69	15	UiO-66-NH2	COMP	Liquid	Zr	none	present	none	2.67	2.5	62.5	VIS		5	1	25			4.022	H2
Wang, Xiaojun, et al. "Microwave irradiation induced UIO-66-NH2 anchored on graphene with high activity for photocatalytic reduction of CO2." Applied Catalysis B: Environmental 228 (2018): 47-53.	70	16	UiO-66-NH2/1.0GR	COMP	Liquid	Zr	none	present	none	2.67	125	62.5	VIS		5	1	25			5.55	H2
Wang, Xiaojun, et al. "Microwave irradiation induced UIO-66-NH2 anchored on graphene with high activity for photocatalytic reduction of CO2." Applied Catalysis B: Environmental 228 (2018): 47-53.	71	17	UiO-66-NH2/1.5GR	COMP	Liquid	Zr	none	present	none	2.64	187.5	62.5	VIS		5	1	25			4.75867	HCOOH
Wang, Xiaojun, et al. "Microwave irradiation induced UIO-66-NH2 anchored on graphene with high activity for photocatalytic reduction of CO2." Applied Catalysis B: Environmental 228 (2018): 47-53.	72	18	UiO-66-NH2/2.0GR	COMP	Liquid	Zr	none	present	none	2.64	250	62.5	VIS		5	1	25			4.76	HCOOH
Wang, Xiaojun, et al. "Microwave irradiation induced UIO-66-NH2 anchored on graphene with high activity for photocatalytic reduction of CO2." Applied Catalysis B: Environmental 228 (2018): 47-53.	73	19	UiO-66-NH2/2.5GR	COMP	Liquid	Zr	none	present	none	2.64	312.5	62.5	VIS		5	1	25			2.4408	H2
Wang, Xiaojun, et al. "Microwave irradiation induced UIO-66-NH2 anchored on graphene with high activity for photocatalytic reduction of CO2." Applied Catalysis B: Environmental 228 (2018): 47-53.	74	20	UiO-66-NH2/3.0GR	COMP	Liquid	Zr	none	present	none	2.64	375	62.5	VIS		5	1	25			1.706	H2
Fei, Honghan, et al. "Photocatalytic CO2 reduction to formate using a Mn (I) molecular catalyst in a robust metal–organic framework." Inorganic chemistry 54.14 (2015): 6821-6828.	75	21	UiO-67 Mn (bpy) (CO)3Br	FUNC	Liquid	Zr	none	none	metal			100	VIS	36	18	1		120	24	110	HCOOH
Wang, Jichong, et al. "Direct Z-scheme 0D/2D heterojunction of CsPbBr3 quantum dots/Bi2WO6 nanosheets for efficient photocatalytic CO2 reduction." ACS applied materials & interfaces 12.28 (2020): 31477-31485.	76	22	CBP/BWO-5	COMP	Gas	none	none	none	Bi2WO6	2.36		0	VIS		10		25	50	2	52	CO
Yan, Shensuo, et al. "Co-ZIF-9/TiO 2 nanostructure for superior CO 2 photoreduction activity." Journal of Materials Chemistry A 4.39 (2016): 15126-15133.	77	23	Co-ZIF-9 (0.03)/TiO2	COMP	Gas	Zn	none	none	TiO2,metal		0.128205	0	UVVIS	390	10	0.7		150	12	22.16	CO
Yan, Shensuo, et al. "Co-ZIF-9/TiO 2 nanostructure for superior CO 2 photoreduction activity." Journal of Materials Chemistry A 4.39 (2016): 15126-15133.	78	23	Co-ZIF-9 (0.03)/TiO2	COMP	Gas	Zn	none	none	TiO2,metal		0.128205	0	UVVIS	390	9	0.7		150	12	23.38	CO
Yan, Shensuo, et al. "Co-ZIF-9/TiO 2 nanostructure for superior CO 2 photoreduction activity." Journal of Materials Chemistry A 4.39 (2016): 15126-15133.	79	23	Co-ZIF-9 (0.03)/TiO2	COMP	Gas	Zn	none	none	TiO2,metal		0.128205	0	UVVIS	390	8	0.7		150	12	25.7325	CO
Yan, Shensuo, et al. "Co-ZIF-9/TiO 2 nanostructure for superior CO 2 photoreduction activity." Journal of Materials Chemistry A 4.39 (2016): 15126-15133.	80	23	Co-ZIF-9 (0.03)/TiO2	COMP	Gas	Zn	none	none	TiO2,metal		0.128205	0	UVVIS	390	7	0.7		150	12	28.8429	CO
Yan, Shensuo, et al. "Co-ZIF-9/TiO 2 nanostructure for superior CO 2 photoreduction activity." Journal of Materials Chemistry A 4.39 (2016): 15126-15133.	81	23	Co-ZIF-9 (0.03)/TiO2	COMP	Gas	Zn	none	none	TiO2,metal		0.128205	0	UVVIS	390	6	0.7		150	12	31.2433	CO
Yan, Shensuo, et al. "Co-ZIF-9/TiO 2 nanostructure for superior CO 2 photoreduction activity." Journal of Materials Chemistry A 4.39 (2016): 15126-15133.	82	23	Co-ZIF-9 (0.03)/TiO2	COMP	Gas	Zn	none	none	TiO2,metal		0.128205	0	UVVIS	390	5	0.7		150	12	36.22	CO
Yan, Shensuo, et al. "Co-ZIF-9/TiO 2 nanostructure for superior CO 2 photoreduction activity." Journal of Materials Chemistry A 4.39 (2016): 15126-15133.	83	23	Co-ZIF-9 (0.03)/TiO2	COMP	Gas	Zn	none	none	TiO2,metal		0.128205	0	UVVIS	390	4	0.7		150	12	42.05	CO
Yan, Shensuo, et al. "Co-ZIF-9/TiO 2 nanostructure for superior CO 2 photoreduction activity." Journal of Materials Chemistry A 4.39 (2016): 15126-15133.	84	23	Co-ZIF-9 (0.03)/TiO2	COMP	Gas	Zn	none	none	TiO2,metal		0.128205	0	UVVIS	390	3	0.7		150	12	51.4333	CO
Yan, Shensuo, et al. "Co-ZIF-9/TiO 2 nanostructure for superior CO 2 photoreduction activity." Journal of Materials Chemistry A 4.39 (2016): 15126-15133.	85	23	Co-ZIF-9 (0.03)/TiO2	COMP	Gas	Zn	none	none	TiO2,metal		0.128205	0	UVVIS	390	2	0.7		150	12	67.01	CO
Yan, Shensuo, et al. "Co-ZIF-9/TiO 2 nanostructure for superior CO 2 photoreduction activity." Journal of Materials Chemistry A 4.39 (2016): 15126-15133.	86	23	Co-ZIF-9 (0.03)/TiO2	COMP	Gas	Zn	none	none	TiO2,metal		0.128205	0	UVVIS	390	1	0.7		150	12	90.7	CO
Yan, Shensuo, et al. "Co-ZIF-9/TiO 2 nanostructure for superior CO 2 photoreduction activity." Journal of Materials Chemistry A 4.39 (2016): 15126-15133.	87	24	Co-ZIF-9 (0.01)/TiO2	COMP	Gas	Zn	none	none	TiO2,metal		0.128205	0	UVVIS	390	10	0.7		150	12	19	CO
Yan, Shensuo, et al. "Co-ZIF-9/TiO 2 nanostructure for superior CO 2 photoreduction activity." Journal of Materials Chemistry A 4.39 (2016): 15126-15133.	88	24	Co-ZIF-9 (0.01)/TiO2	COMP	Gas	Zn	none	none	TiO2,metal		0.128205	0	UVVIS	390	9	0.7		150	12	20.6444	CO
Yan, Shensuo, et al. "Co-ZIF-9/TiO 2 nanostructure for superior CO 2 photoreduction activity." Journal of Materials Chemistry A 4.39 (2016): 15126-15133.	89	24	Co-ZIF-9 (0.01)/TiO2	COMP	Gas	Zn	none	none	TiO2,metal		0.128205	0	UVVIS	390	8	0.7		150	12	22.0375	CO
Yan, Shensuo, et al. "Co-ZIF-9/TiO 2 nanostructure for superior CO 2 photoreduction activity." Journal of Materials Chemistry A 4.39 (2016): 15126-15133.	90	24	Co-ZIF-9 (0.01)/TiO2	COMP	Gas	Zn	none	none	TiO2,metal		0.128205	0	UVVIS	390	7	0.7		150	12	24.2171	CO
Yan, Shensuo, et al. "Co-ZIF-9/TiO 2 nanostructure for superior CO 2 photoreduction activity." Journal of Materials Chemistry A 4.39 (2016): 15126-15133.	91	24	Co-ZIF-9 (0.01)/TiO2	COMP	Gas	Zn	none	none	TiO2,metal		0.128205	0	UVVIS	390	6	0.7		150	12	27.38	CO
Yan, Shensuo, et al. "Co-ZIF-9/TiO 2 nanostructure for superior CO 2 photoreduction activity." Journal of Materials Chemistry A 4.39 (2016): 15126-15133.	92	24	Co-ZIF-9 (0.01)/TiO2	COMP	Gas	Zn	none	none	TiO2,metal		0.128205	0	UVVIS	390	5	0.7		150	12	30.1	CO
Yan, Shensuo, et al. "Co-ZIF-9/TiO 2 nanostructure for superior CO 2 photoreduction activity." Journal of Materials Chemistry A 4.39 (2016): 15126-15133.	93	24	Co-ZIF-9 (0.01)/TiO2	COMP	Gas	Zn	none	none	TiO2,metal		0.128205	0	UVVIS	390	4	0.7		150	12	35.27	CO
Yan, Shensuo, et al. "Co-ZIF-9/TiO 2 nanostructure for superior CO 2 photoreduction activity." Journal of Materials Chemistry A 4.39 (2016): 15126-15133.	94	24	Co-ZIF-9 (0.01)/TiO2	COMP	Gas	Zn	none	none	TiO2,metal		0.128205	0	UVVIS	390	3	0.7		150	12	41.16	CO
Yan, Shensuo, et al. "Co-ZIF-9/TiO 2 nanostructure for superior CO 2 photoreduction activity." Journal of Materials Chemistry A 4.39 (2016): 15126-15133.	95	24	Co-ZIF-9 (0.01)/TiO2	COMP	Gas	Zn	none	none	TiO2,metal		0.128205	0	UVVIS	390	2	0.7		150	12	50.29	CO
Yan, Shensuo, et al. "Co-ZIF-9/TiO 2 nanostructure for superior CO 2 photoreduction activity." Journal of Materials Chemistry A 4.39 (2016): 15126-15133.	96	24	Co-ZIF-9 (0.01)/TiO2	COMP	Gas	Zn	none	none	TiO2,metal		0.128205	0	UVVIS	390	1	0.7		150	12	67.62	CO
Yan, Shensuo, et al. "Co-ZIF-9/TiO 2 nanostructure for superior CO 2 photoreduction activity." Journal of Materials Chemistry A 4.39 (2016): 15126-15133.	97	25	Co-ZIF-9 (0.1)/TiO2	COMP	Gas	Zn	none	none	TiO2,metal	3.21818	0.128205	0	UVVIS	390	10	0.7		150	12	11.6	CO
Yan, Shensuo, et al. "Co-ZIF-9/TiO 2 nanostructure for superior CO 2 photoreduction activity." Journal of Materials Chemistry A 4.39 (2016): 15126-15133.	98	25	Co-ZIF-9 (0.1)/TiO2	COMP	Gas	Zn	none	none	TiO2,metal	3.21818	0.128205	0	UVVIS	390	9	0.7		150	12	13.2311	CO
Yan, Shensuo, et al. "Co-ZIF-9/TiO 2 nanostructure for superior CO 2 photoreduction activity." Journal of Materials Chemistry A 4.39 (2016): 15126-15133.	99	25	Co-ZIF-9 (0.1)/TiO2	COMP	Gas	Zn	none	none	TiO2,metal	3.21818	0.128205	0	UVVIS	390	8	0.7		150	12	14.3275	CO
Yan, Shensuo, et al. "Co-ZIF-9/TiO 2 nanostructure for superior CO 2 photoreduction activity." Journal of Materials Chemistry A 4.39 (2016): 15126-15133.	100	25	Co-ZIF-9 (0.1)/TiO2	COMP	Gas	Zn	none	none	TiO2,metal	3.21818	0.128205	0	UVVIS	390	7	0.7		150	12	15.7229	CO
Yan, Shensuo, et al. "Co-ZIF-9/TiO 2 nanostructure for superior CO 2 photoreduction activity." Journal of Materials Chemistry A 4.39 (2016): 15126-15133.	101	25	Co-ZIF-9 (0.1)/TiO2	COMP	Gas	Zn	none	none	TiO2,metal	3.21818	0.128205	0	UVVIS	390	6	0.7		150	12	18.4	CO
Yan, Shensuo, et al. "Co-ZIF-9/TiO 2 nanostructure for superior CO 2 photoreduction activity." Journal of Materials Chemistry A 4.39 (2016): 15126-15133.	102	25	Co-ZIF-9 (0.1)/TiO2	COMP	Gas	Zn	none	none	TiO2,metal	3.21818	0.128205	0	UVVIS	390	5	0.7		150	12	20.548	CO
Yan, Shensuo, et al. "Co-ZIF-9/TiO 2 nanostructure for superior CO 2 photoreduction activity." Journal of Materials Chemistry A 4.39 (2016): 15126-15133.	103	25	Co-ZIF-9 (0.1)/TiO2	COMP	Gas	Zn	none	none	TiO2,metal	3.21818	0.128205	0	UVVIS	390	4	0.7		150	12	21.535	CO
Yan, Shensuo, et al. "Co-ZIF-9/TiO 2 nanostructure for superior CO 2 photoreduction activity." Journal of Materials Chemistry A 4.39 (2016): 15126-15133.	104	25	Co-ZIF-9 (0.1)/TiO2	COMP	Gas	Zn	none	none	TiO2,metal	3.21818	0.128205	0	UVVIS	390	3	0.7		150	12	25.0533	CO
Yan, Shensuo, et al. "Co-ZIF-9/TiO 2 nanostructure for superior CO 2 photoreduction activity." Journal of Materials Chemistry A 4.39 (2016): 15126-15133.	105	25	Co-ZIF-9 (0.1)/TiO2	COMP	Gas	Zn	none	none	TiO2,metal	3.21818	0.128205	0	UVVIS	390	2	0.7		150	12	27.78	CO
Yan, Shensuo, et al. "Co-ZIF-9/TiO 2 nanostructure for superior CO 2 photoreduction activity." Journal of Materials Chemistry A 4.39 (2016): 15126-15133.	106	25	Co-ZIF-9 (0.1)/TiO2	COMP	Gas	Zn	none	none	TiO2,metal	3.21818	0.128205	0	UVVIS	390	1	0.7		150	12	27.8	CO
Yan, Shensuo, et al. "Co-ZIF-9/TiO 2 nanostructure for superior CO 2 photoreduction activity." Journal of Materials Chemistry A 4.39 (2016): 15126-15133.	107	26	Co-ZIF-9 (0.2)/TiO2	COMP	Gas	Zn	none	none	TiO2,metal		0.128205	0	UVVIS	390	10	0.7		150	12	8.2	CO
Yan, Shensuo, et al. "Co-ZIF-9/TiO 2 nanostructure for superior CO 2 photoreduction activity." Journal of Materials Chemistry A 4.39 (2016): 15126-15133.	108	26	Co-ZIF-9 (0.2)/TiO2	COMP	Gas	Zn	none	none	TiO2,metal		0.128205	0	UVVIS	390	9	0.7		150	12	8.69556	CO
Yan, Shensuo, et al. "Co-ZIF-9/TiO 2 nanostructure for superior CO 2 photoreduction activity." Journal of Materials Chemistry A 4.39 (2016): 15126-15133.	109	26	Co-ZIF-9 (0.2)/TiO2	COMP	Gas	Zn	none	none	TiO2,metal		0.128205	0	UVVIS	390	8	0.7		150	12	10.025	CO
Yan, Shensuo, et al. "Co-ZIF-9/TiO 2 nanostructure for superior CO 2 photoreduction activity." Journal of Materials Chemistry A 4.39 (2016): 15126-15133.	110	26	Co-ZIF-9 (0.2)/TiO2	COMP	Gas	Zn	none	none	TiO2,metal		0.128205	0	UVVIS	390	7	0.7		150	12	11.6743	CO
Yan, Shensuo, et al. "Co-ZIF-9/TiO 2 nanostructure for superior CO 2 photoreduction activity." Journal of Materials Chemistry A 4.39 (2016): 15126-15133.	111	26	Co-ZIF-9 (0.2)/TiO2	COMP	Gas	Zn	none	none	TiO2,metal		0.128205	0	UVVIS	390	6	0.7		150	12	13.76	CO
Yan, Shensuo, et al. "Co-ZIF-9/TiO 2 nanostructure for superior CO 2 photoreduction activity." Journal of Materials Chemistry A 4.39 (2016): 15126-15133.	112	26	Co-ZIF-9 (0.2)/TiO2	COMP	Gas	Zn	none	none	TiO2,metal		0.128205	0	UVVIS	390	5	0.7		150	12	17.132	CO
Yan, Shensuo, et al. "Co-ZIF-9/TiO 2 nanostructure for superior CO 2 photoreduction activity." Journal of Materials Chemistry A 4.39 (2016): 15126-15133.	113	26	Co-ZIF-9 (0.2)/TiO2	COMP	Gas	Zn	none	none	TiO2,metal		0.128205	0	UVVIS	390	4	0.7		150	12	21.15	CO
Yan, Shensuo, et al. "Co-ZIF-9/TiO 2 nanostructure for superior CO 2 photoreduction activity." Journal of Materials Chemistry A 4.39 (2016): 15126-15133.	114	26	Co-ZIF-9 (0.2)/TiO2	COMP	Gas	Zn	none	none	TiO2,metal		0.128205	0	UVVIS	390	3	0.7		150	12	27.2333	CO
Yan, Shensuo, et al. "Co-ZIF-9/TiO 2 nanostructure for superior CO 2 photoreduction activity." Journal of Materials Chemistry A 4.39 (2016): 15126-15133.	115	26	Co-ZIF-9 (0.2)/TiO2	COMP	Gas	Zn	none	none	TiO2,metal		0.128205	0	UVVIS	390	2	0.7		150	12	34.5	CO
Yan, Shensuo, et al. "Co-ZIF-9/TiO 2 nanostructure for superior CO 2 photoreduction activity." Journal of Materials Chemistry A 4.39 (2016): 15126-15133.	116	26	Co-ZIF-9 (0.2)/TiO2	COMP	Gas	Zn	none	none	TiO2,metal		0.128205	0	UVVIS	390	1	0.7		150	12	37.34	CO
Yan, Shensuo, et al. "Co-ZIF-9/TiO 2 nanostructure for superior CO 2 photoreduction activity." Journal of Materials Chemistry A 4.39 (2016): 15126-15133.	117	27	Co-ZIF-9 (0.3)/TiO2	COMP	Gas	Zn	none	none	TiO2,metal	3.42265	0.128205	0	UVVIS	390	10	0.7		150	12	9.98	CO
Yan, Shensuo, et al. "Co-ZIF-9/TiO 2 nanostructure for superior CO 2 photoreduction activity." Journal of Materials Chemistry A 4.39 (2016): 15126-15133.	118	27	Co-ZIF-9 (0.3)/TiO2	COMP	Gas	Zn	none	none	TiO2,metal	3.42265	0.128205	0	UVVIS	390	9	0.7		150	12	10.02	CO
Yan, Shensuo, et al. "Co-ZIF-9/TiO 2 nanostructure for superior CO 2 photoreduction activity." Journal of Materials Chemistry A 4.39 (2016): 15126-15133.	119	27	Co-ZIF-9 (0.3)/TiO2	COMP	Gas	Zn	none	none	TiO2,metal	3.42265	0.128205	0	UVVIS	390	8	0.7		150	12	10.8325	CO
Yan, Shensuo, et al. "Co-ZIF-9/TiO 2 nanostructure for superior CO 2 photoreduction activity." Journal of Materials Chemistry A 4.39 (2016): 15126-15133.	120	27	Co-ZIF-9 (0.3)/TiO2	COMP	Gas	Zn	none	none	TiO2,metal	3.42265	0.128205	0	UVVIS	390	7	0.7		150	12	12.0743	CO
Yan, Shensuo, et al. "Co-ZIF-9/TiO 2 nanostructure for superior CO 2 photoreduction activity." Journal of Materials Chemistry A 4.39 (2016): 15126-15133.	121	27	Co-ZIF-9 (0.3)/TiO2	COMP	Gas	Zn	none	none	TiO2,metal	3.42265	0.128205	0	UVVIS	390	6	0.7		150	12	13.7667	CO
Yan, Shensuo, et al. "Co-ZIF-9/TiO 2 nanostructure for superior CO 2 photoreduction activity." Journal of Materials Chemistry A 4.39 (2016): 15126-15133.	122	27	Co-ZIF-9 (0.3)/TiO2	COMP	Gas	Zn	none	none	TiO2,metal	3.42265	0.128205	0	UVVIS	390	5	0.7		150	12	15.72	CO
Yan, Shensuo, et al. "Co-ZIF-9/TiO 2 nanostructure for superior CO 2 photoreduction activity." Journal of Materials Chemistry A 4.39 (2016): 15126-15133.	123	27	Co-ZIF-9 (0.3)/TiO2	COMP	Gas	Zn	none	none	TiO2,metal	3.42265	0.128205	0	UVVIS	390	4	0.7		150	12	17.955	CO
Yan, Shensuo, et al. "Co-ZIF-9/TiO 2 nanostructure for superior CO 2 photoreduction activity." Journal of Materials Chemistry A 4.39 (2016): 15126-15133.	124	27	Co-ZIF-9 (0.3)/TiO2	COMP	Gas	Zn	none	none	TiO2,metal	3.42265	0.128205	0	UVVIS	390	3	0.7		150	12	19.46	CO
Yan, Shensuo, et al. "Co-ZIF-9/TiO 2 nanostructure for superior CO 2 photoreduction activity." Journal of Materials Chemistry A 4.39 (2016): 15126-15133.	125	27	Co-ZIF-9 (0.3)/TiO2	COMP	Gas	Zn	none	none	TiO2,metal	3.42265	0.128205	0	UVVIS	390	2	0.7		150	12	20.32	CO
Yan, Shensuo, et al. "Co-ZIF-9/TiO 2 nanostructure for superior CO 2 photoreduction activity." Journal of Materials Chemistry A 4.39 (2016): 15126-15133.	126	27	Co-ZIF-9 (0.3)/TiO2	COMP	Gas	Zn	none	none	TiO2,metal	3.42265	0.128205	0	UVVIS	390	1	0.7		150	12	17.5	CO
Yan, Shensuo, et al. "Co-ZIF-9/TiO 2 nanostructure for superior CO 2 photoreduction activity." Journal of Materials Chemistry A 4.39 (2016): 15126-15133.	127	28	Co-ZIF-9 (0.4)/TiO2	COMP	Gas	Zn	none	none	TiO2,metal	3.0975	0.128205	0	UVVIS	390	10	0.7		150	12	8.7	CO
Yan, Shensuo, et al. "Co-ZIF-9/TiO 2 nanostructure for superior CO 2 photoreduction activity." Journal of Materials Chemistry A 4.39 (2016): 15126-15133.	128	28	Co-ZIF-9 (0.4)/TiO2	COMP	Gas	Zn	none	none	TiO2,metal	3.0975	0.128205	0	UVVIS	390	9	0.7		150	12	8.91556	CO
Yan, Shensuo, et al. "Co-ZIF-9/TiO 2 nanostructure for superior CO 2 photoreduction activity." Journal of Materials Chemistry A 4.39 (2016): 15126-15133.	129	28	Co-ZIF-9 (0.4)/TiO2	COMP	Gas	Zn	none	none	TiO2,metal	3.0975	0.128205	0	UVVIS	390	8	0.7		150	12	10.3125	CO
Yan, Shensuo, et al. "Co-ZIF-9/TiO 2 nanostructure for superior CO 2 photoreduction activity." Journal of Materials Chemistry A 4.39 (2016): 15126-15133.	130	28	Co-ZIF-9 (0.4)/TiO2	COMP	Gas	Zn	none	none	TiO2,metal	3.0975	0.128205	0	UVVIS	390	7	0.7		150	12	11.82	CO
Yan, Shensuo, et al. "Co-ZIF-9/TiO 2 nanostructure for superior CO 2 photoreduction activity." Journal of Materials Chemistry A 4.39 (2016): 15126-15133.	131	28	Co-ZIF-9 (0.4)/TiO2	COMP	Gas	Zn	none	none	TiO2,metal	3.0975	0.128205	0	UVVIS	390	6	0.7		150	12	13.4933	CO
Yan, Shensuo, et al. "Co-ZIF-9/TiO 2 nanostructure for superior CO 2 photoreduction activity." Journal of Materials Chemistry A 4.39 (2016): 15126-15133.	132	28	Co-ZIF-9 (0.4)/TiO2	COMP	Gas	Zn	none	none	TiO2,metal	3.0975	0.128205	0	UVVIS	390	5	0.7		150	12	15.624	CO
Yan, Shensuo, et al. "Co-ZIF-9/TiO 2 nanostructure for superior CO 2 photoreduction activity." Journal of Materials Chemistry A 4.39 (2016): 15126-15133.	133	28	Co-ZIF-9 (0.4)/TiO2	COMP	Gas	Zn	none	none	TiO2,metal	3.0975	0.128205	0	UVVIS	390	4	0.7		150	12	15.875	CO
Yan, Shensuo, et al. "Co-ZIF-9/TiO 2 nanostructure for superior CO 2 photoreduction activity." Journal of Materials Chemistry A 4.39 (2016): 15126-15133.	134	28	Co-ZIF-9 (0.4)/TiO2	COMP	Gas	Zn	none	none	TiO2,metal	3.0975	0.128205	0	UVVIS	390	3	0.7		150	12	18.4333	CO
Yan, Shensuo, et al. "Co-ZIF-9/TiO 2 nanostructure for superior CO 2 photoreduction activity." Journal of Materials Chemistry A 4.39 (2016): 15126-15133.	135	28	Co-ZIF-9 (0.4)/TiO2	COMP	Gas	Zn	none	none	TiO2,metal	3.0975	0.128205	0	UVVIS	390	2	0.7		150	12	20.69	CO
Yan, Shensuo, et al. "Co-ZIF-9/TiO 2 nanostructure for superior CO 2 photoreduction activity." Journal of Materials Chemistry A 4.39 (2016): 15126-15133.	136	28	Co-ZIF-9 (0.4)/TiO2	COMP	Gas	Zn	none	none	TiO2,metal	3.0975	0.128205	0	UVVIS	390	1	0.7		150	12	17.16	CO
Yan, Shensuo, et al. "Co-ZIF-9/TiO 2 nanostructure for superior CO 2 photoreduction activity." Journal of Materials Chemistry A 4.39 (2016): 15126-15133.	137	29	Co-ZIF-9 (0.6)/TiO2	COMP	Gas	Zn	none	none	TiO2,metal		0.128205	0	UVVIS	390	10	0.7		150	12	5.7	CO
Yan, Shensuo, et al. "Co-ZIF-9/TiO 2 nanostructure for superior CO 2 photoreduction activity." Journal of Materials Chemistry A 4.39 (2016): 15126-15133.	138	29	Co-ZIF-9 (0.6)/TiO2	COMP	Gas	Zn	none	none	TiO2,metal		0.128205	0	UVVIS	390	9	0.7		150	12	6.16889	CO
Yan, Shensuo, et al. "Co-ZIF-9/TiO 2 nanostructure for superior CO 2 photoreduction activity." Journal of Materials Chemistry A 4.39 (2016): 15126-15133.	139	29	Co-ZIF-9 (0.6)/TiO2	COMP	Gas	Zn	none	none	TiO2,metal		0.128205	0	UVVIS	390	8	0.7		150	12	7.27	CO
Yan, Shensuo, et al. "Co-ZIF-9/TiO 2 nanostructure for superior CO 2 photoreduction activity." Journal of Materials Chemistry A 4.39 (2016): 15126-15133.	140	29	Co-ZIF-9 (0.6)/TiO2	COMP	Gas	Zn	none	none	TiO2,metal		0.128205	0	UVVIS	390	7	0.7		150	12	7.98571	CO
Yan, Shensuo, et al. "Co-ZIF-9/TiO 2 nanostructure for superior CO 2 photoreduction activity." Journal of Materials Chemistry A 4.39 (2016): 15126-15133.	141	29	Co-ZIF-9 (0.6)/TiO2	COMP	Gas	Zn	none	none	TiO2,metal		0.128205	0	UVVIS	390	6	0.7		150	12	8.62333	CO
Yan, Shensuo, et al. "Co-ZIF-9/TiO 2 nanostructure for superior CO 2 photoreduction activity." Journal of Materials Chemistry A 4.39 (2016): 15126-15133.	142	29	Co-ZIF-9 (0.6)/TiO2	COMP	Gas	Zn	none	none	TiO2,metal		0.128205	0	UVVIS	390	5	0.7		150	12	10.124	CO
Yan, Shensuo, et al. "Co-ZIF-9/TiO 2 nanostructure for superior CO 2 photoreduction activity." Journal of Materials Chemistry A 4.39 (2016): 15126-15133.	143	29	Co-ZIF-9 (0.6)/TiO2	COMP	Gas	Zn	none	none	TiO2,metal		0.128205	0	UVVIS	390	4	0.7		150	12	12.425	CO
Yan, Shensuo, et al. "Co-ZIF-9/TiO 2 nanostructure for superior CO 2 photoreduction activity." Journal of Materials Chemistry A 4.39 (2016): 15126-15133.	144	29	Co-ZIF-9 (0.6)/TiO2	COMP	Gas	Zn	none	none	TiO2,metal		0.128205	0	UVVIS	390	3	0.7		150	12	14.42	CO
Yan, Shensuo, et al. "Co-ZIF-9/TiO 2 nanostructure for superior CO 2 photoreduction activity." Journal of Materials Chemistry A 4.39 (2016): 15126-15133.	145	29	Co-ZIF-9 (0.6)/TiO2	COMP	Gas	Zn	none	none	TiO2,metal		0.128205	0	UVVIS	390	2	0.7		150	12	17.53	CO
Yan, Shensuo, et al. "Co-ZIF-9/TiO 2 nanostructure for superior CO 2 photoreduction activity." Journal of Materials Chemistry A 4.39 (2016): 15126-15133.	146	29	Co-ZIF-9 (0.6)/TiO2	COMP	Gas	Zn	none	none	TiO2,metal		0.128205	0	UVVIS	390	1	0.7		150	12	22.98	CO
Wang, Jichong, et al. "Direct Z-scheme 0D/2D heterojunction of CsPbBr3 quantum dots/Bi2WO6 nanosheets for efficient photocatalytic CO2 reduction." ACS applied materials & interfaces 12.28 (2020): 31477-31485.	147	30	CBP/BWO-8	COMP	Gas	none	none	none	Bi2WO6	2.36		0	VIS		10		25	50	2	38	CO
Wang, Mengtao, Dengke Wang, and Zhaohui Li. "Self-assembly of CPO-27-Mg/TiO2 nanocomposite with enhanced performance for photocatalytic CO2 reduction." Applied Catalysis B: Environmental 183 (2016): 47-52.	148	31	CPO-27 Mg (0%)/TiO2	COMP	Gas	other	none	none	TiO2		1	0	UV	10	10		200	110	72	4.75	CO
Wang, Mengtao, Dengke Wang, and Zhaohui Li. "Self-assembly of CPO-27-Mg/TiO2 nanocomposite with enhanced performance for photocatalytic CO2 reduction." Applied Catalysis B: Environmental 183 (2016): 47-52.	149	32	CPO-27 Mg (26.1%)/TiO2	COMP	Gas	other	none	none	TiO2		1	0	UV	10	10		200	110	72	5.07	CO
Wang, Mengtao, Dengke Wang, and Zhaohui Li. "Self-assembly of CPO-27-Mg/TiO2 nanocomposite with enhanced performance for photocatalytic CO2 reduction." Applied Catalysis B: Environmental 183 (2016): 47-52.	150	33	CPO-27 Mg (39.3%)/TiO2	COMP	Gas	other	none	none	TiO2		1	0	UV	10	10		200	110	72	6.44	CO
Wang, Mengtao, Dengke Wang, and Zhaohui Li. "Self-assembly of CPO-27-Mg/TiO2 nanocomposite with enhanced performance for photocatalytic CO2 reduction." Applied Catalysis B: Environmental 183 (2016): 47-52.	151	34	CPO-27 Mg (57.2%)/TiO2	COMP	Gas	other	none	none	TiO2		1	0	UV	10	10		200	110	72	5.68	CO
Wang, Mengtao, Dengke Wang, and Zhaohui Li. "Self-assembly of CPO-27-Mg/TiO2 nanocomposite with enhanced performance for photocatalytic CO2 reduction." Applied Catalysis B: Environmental 183 (2016): 47-52.	152	35	CPO-27 Mg (68.7%)/TiO2	COMP	Gas	other	none	none	TiO2		1	0	UV	10	10		200	110	72	4.1	CO
Wang, Mengtao, Dengke Wang, and Zhaohui Li. "Self-assembly of CPO-27-Mg/TiO2 nanocomposite with enhanced performance for photocatalytic CO2 reduction." Applied Catalysis B: Environmental 183 (2016): 47-52.	153	36	mixed CPO-27 Mg and TiO2	COMP	Gas	other	none	none	TiO2		1	0	UV	10	10		200	110	72	3.45	CO
Wang, Mengtao, Dengke Wang, and Zhaohui Li. "Self-assembly of CPO-27-Mg/TiO2 nanocomposite with enhanced performance for photocatalytic CO2 reduction." Applied Catalysis B: Environmental 183 (2016): 47-52.	154	37	ZIF-8/TiO2	COMP	Gas	Zn	none	none	TiO2		1	0	UV	10	10		200	110	72	4.45	CO
Chen, Dashu, et al. "Highly efficient visible-light-driven CO 2 reduction to formate by a new anthracene-based zirconium MOF via dual catalytic routes." Journal of Materials Chemistry A 4.7 (2016): 2657-2662.	155	38	NNU-28	PURE	Liquid	Zr	none	none	none	5	0.833333	3.22581	VIS		2	1	100	100	72	29.33	HCOOH
Chen, Dashu, et al. "Highly efficient visible-light-driven CO 2 reduction to formate by a new anthracene-based zirconium MOF via dual catalytic routes." Journal of Materials Chemistry A 4.7 (2016): 2657-2662.	156	38	NNU-28	PURE	Liquid	Zr	none	none	none	5	0.833333	3.22581	VIS		4	1	100	100	72	31.845	HCOOH
Chen, Dashu, et al. "Highly efficient visible-light-driven CO 2 reduction to formate by a new anthracene-based zirconium MOF via dual catalytic routes." Journal of Materials Chemistry A 4.7 (2016): 2657-2662.	157	38	NNU-28	PURE	Liquid	Zr	none	none	none	5	0.833333	3.22581	VIS		6	1	100	100	72	37.15	HCOOH
Chen, Dashu, et al. "Highly efficient visible-light-driven CO 2 reduction to formate by a new anthracene-based zirconium MOF via dual catalytic routes." Journal of Materials Chemistry A 4.7 (2016): 2657-2662.	158	38	NNU-28	PURE	Liquid	Zr	none	none	none	5	0.833333	3.22581	VIS		8	1	100	100	72	44.4125	HCOOH
Chen, Dashu, et al. "Highly efficient visible-light-driven CO 2 reduction to formate by a new anthracene-based zirconium MOF via dual catalytic routes." Journal of Materials Chemistry A 4.7 (2016): 2657-2662.	159	38	NNU-28	PURE	Liquid	Zr	none	none	none	5	0.833333	3.22581	VIS		10	1	100	100	72	52.8	HCOOH
Huang, Ruiyun, et al. "A Rhenium‐Functionalized Metal–Organic Framework as a Single‐Site Catalyst for Photochemical Reduction of Carbon Dioxide." European Journal of Inorganic Chemistry 2016.27 (2016): 4358-4362.	160	39	Re-UiOf	FUNC	Liquid	Zr	none	none	none			4.69484	UVVIS	5	20	1		100	72	6.84	CO
Sadeghi, N., S. Sharifnia, and M. Sheikh Arabi. "A porphyrin-based metal organic framework for high rate photoreduction of CO2 to CH4 in gas phase." Journal of CO2 Utilization 16 (2016): 450-457.	161	40	Zn/PMOF	PURE	Gas	none	none	none	metal		0.3	0	UVVIS	1000	4	1.4	100		3	8.68	CH4
Sadeghi, N., S. Sharifnia, and M. Sheikh Arabi. "A porphyrin-based metal organic framework for high rate photoreduction of CO2 to CH4 in gas phase." Journal of CO2 Utilization 16 (2016): 450-457.	162	40	Zn/PMOF	PURE	Gas	none	none	none	metal		0.3	0	UVVIS	1000	3	1.4	100		3	10.8922	CH4
Sadeghi, N., S. Sharifnia, and M. Sheikh Arabi. "A porphyrin-based metal organic framework for high rate photoreduction of CO2 to CH4 in gas phase." Journal of CO2 Utilization 16 (2016): 450-457.	163	40	Zn/PMOF	PURE	Gas	none	none	none	metal		0.3	0	UVVIS	1000	2	1.4	100		3	14.5517	CH4
Sadeghi, N., S. Sharifnia, and M. Sheikh Arabi. "A porphyrin-based metal organic framework for high rate photoreduction of CO2 to CH4 in gas phase." Journal of CO2 Utilization 16 (2016): 450-457.	164	40	Zn/PMOF	PURE	Gas	none	none	none	metal		0.3	0	UVVIS	1000	1	1.4	100		3	17.7667	CH4
Sun, Manying, et al. "Enhancement of visible-light-driven CO 2 reduction performance using an amine-functionalized zirconium metal–organic framework." Dalton Transactions 47.3 (2018): 909-915.	165	41	Zr-SDCA-NH2	FUNC	Liquid	Zr	none	present	none	2.17	0.8	3.22581	VIS		12	1		100	72	39.2	HCOOH
Sun, Manying, et al. "Enhancement of visible-light-driven CO 2 reduction performance using an amine-functionalized zirconium metal–organic framework." Dalton Transactions 47.3 (2018): 909-915.	166	41	Zr-SDCA-NH2	FUNC	Liquid	Zr	none	present	none	2.17	0.8	3.22581	VIS		9	1		100	72	37.175	HCOOH
Sun, Manying, et al. "Enhancement of visible-light-driven CO 2 reduction performance using an amine-functionalized zirconium metal–organic framework." Dalton Transactions 47.3 (2018): 909-915.	167	41	Zr-SDCA-NH2	FUNC	Liquid	Zr	none	present	none	2.17	0.8	3.22581	VIS		6	1		100	72	39.475	HCOOH
Sun, Manying, et al. "Enhancement of visible-light-driven CO 2 reduction performance using an amine-functionalized zirconium metal–organic framework." Dalton Transactions 47.3 (2018): 909-915.	168	41	Zr-SDCA-NH2	FUNC	Liquid	Zr	none	present	none	2.17	0.8	3.22581	VIS		3	1		100	72	40.9333	HCOOH
Chen, Er‐Xia, et al. "Acid and base resistant zirconium polyphenolate‐metalloporphyrin scaffolds for efficient CO2 photoreduction." Advanced Materials 30.2 (2018): 1704388.	169	42	Zr(IV) Chain	FUNC	Liquid	none	none	none	none	3.38	4	20	VIS	25	15	1	20	140	24	0.04	CH4
Chen, Er‐Xia, et al. "Acid and base resistant zirconium polyphenolate‐metalloporphyrin scaffolds for efficient CO2 photoreduction." Advanced Materials 30.2 (2018): 1704388.	170	43	THPP-Co	FUNC	Liquid	none	none	none	metal	2	4	20	VIS	25	15	1	20	140	24	0.506667	CH4
Chen, Er‐Xia, et al. "Acid and base resistant zirconium polyphenolate‐metalloporphyrin scaffolds for efficient CO2 photoreduction." Advanced Materials 30.2 (2018): 1704388.	171	44	Zr(IV) Chain + THPP-Co	FUNC	Liquid	none	none	none	metal	1.99	4	20	VIS	25	15	1	20	140	24	0.34	CH4
Chen, Er‐Xia, et al. "Acid and base resistant zirconium polyphenolate‐metalloporphyrin scaffolds for efficient CO2 photoreduction." Advanced Materials 30.2 (2018): 1704388.	172	45	ZrPP-1-H2	FUNC	Liquid	Zr	none	none	nonmetal	2.04	4	20	VIS	25	15	1	20	140	24	0.246667	CH4
Chen, Er‐Xia, et al. "Acid and base resistant zirconium polyphenolate‐metalloporphyrin scaffolds for efficient CO2 photoreduction." Advanced Materials 30.2 (2018): 1704388.	173	46	ZrPP-1-Zn	FUNC	Liquid	Zr	none	none	metal	2.06	4	20	VIS	25	15	1	20	140	24	0.166667	CH4
Chen, Er‐Xia, et al. "Acid and base resistant zirconium polyphenolate‐metalloporphyrin scaffolds for efficient CO2 photoreduction." Advanced Materials 30.2 (2018): 1704388.	174	47	ZrPP-1-Cu	FUNC	Liquid	Zr	none	none	metal	2.04	4	20	VIS	25	15	1	20	140	24	3.30613	CO
Chen, Er‐Xia, et al. "Acid and base resistant zirconium polyphenolate‐metalloporphyrin scaffolds for efficient CO2 photoreduction." Advanced Materials 30.2 (2018): 1704388.	175	47	ZrPP-1-Cu	FUNC	Liquid	Zr	none	none	metal	2.04	4	20	VIS	25	12	1	20	140	24	4.13267	CO
Chen, Er‐Xia, et al. "Acid and base resistant zirconium polyphenolate‐metalloporphyrin scaffolds for efficient CO2 photoreduction." Advanced Materials 30.2 (2018): 1704388.	176	47	ZrPP-1-Cu	FUNC	Liquid	Zr	none	none	metal	2.04	4	20	VIS	25	9	1	20	140	24	3.68778	CO
Chen, Er‐Xia, et al. "Acid and base resistant zirconium polyphenolate‐metalloporphyrin scaffolds for efficient CO2 photoreduction." Advanced Materials 30.2 (2018): 1704388.	177	47	ZrPP-1-Cu	FUNC	Liquid	Zr	none	none	metal	2.04	4	20	VIS	25	6	1	20	140	24	4.39333	CO
Chen, Er‐Xia, et al. "Acid and base resistant zirconium polyphenolate‐metalloporphyrin scaffolds for efficient CO2 photoreduction." Advanced Materials 30.2 (2018): 1704388.	178	47	ZrPP-1-Cu	FUNC	Liquid	Zr	none	none	metal	2.04	4	20	VIS	25	3	1	20	140	24	6.66	CO
Chen, Er‐Xia, et al. "Acid and base resistant zirconium polyphenolate‐metalloporphyrin scaffolds for efficient CO2 photoreduction." Advanced Materials 30.2 (2018): 1704388.	179	48	ZrPP-1-Fe	FUNC	Liquid	Zr	none	none	metal	1.93	4	20	VIS	25	15	1	20	140	24	4.56933	CO
Chen, Er‐Xia, et al. "Acid and base resistant zirconium polyphenolate‐metalloporphyrin scaffolds for efficient CO2 photoreduction." Advanced Materials 30.2 (2018): 1704388.	180	48	ZrPP-1-Fe	FUNC	Liquid	Zr	none	none	metal	1.93	4	20	VIS	25	12	1	20	140	24	4.08	CO
Chen, Er‐Xia, et al. "Acid and base resistant zirconium polyphenolate‐metalloporphyrin scaffolds for efficient CO2 photoreduction." Advanced Materials 30.2 (2018): 1704388.	181	48	ZrPP-1-Fe	FUNC	Liquid	Zr	none	none	metal	1.93	4	20	VIS	25	9	1	20	140	24	4.07333	CO
Chen, Er‐Xia, et al. "Acid and base resistant zirconium polyphenolate‐metalloporphyrin scaffolds for efficient CO2 photoreduction." Advanced Materials 30.2 (2018): 1704388.	182	48	ZrPP-1-Fe	FUNC	Liquid	Zr	none	none	metal	1.93	4	20	VIS	25	6	1	20	140	24	4.515	CO
Chen, Er‐Xia, et al. "Acid and base resistant zirconium polyphenolate‐metalloporphyrin scaffolds for efficient CO2 photoreduction." Advanced Materials 30.2 (2018): 1704388.	183	48	ZrPP-1-Fe	FUNC	Liquid	Zr	none	none	metal	1.93	4	20	VIS	25	3	1	20	140	24	4.17333	CH4
Chen, Er‐Xia, et al. "Acid and base resistant zirconium polyphenolate‐metalloporphyrin scaffolds for efficient CO2 photoreduction." Advanced Materials 30.2 (2018): 1704388.	184	49	ZrPP-1-Co	FUNC	Liquid	Zr	none	none	metal	1.78	4	20	VIS	25	15	1	20	140	24	14.3965	CO
Chen, Er‐Xia, et al. "Acid and base resistant zirconium polyphenolate‐metalloporphyrin scaffolds for efficient CO2 photoreduction." Advanced Materials 30.2 (2018): 1704388.	185	49	ZrPP-1-Co	FUNC	Liquid	Zr	none	none	metal	1.78	4	20	VIS	25	12	1	20	140	24	12.15	CO
Chen, Er‐Xia, et al. "Acid and base resistant zirconium polyphenolate‐metalloporphyrin scaffolds for efficient CO2 photoreduction." Advanced Materials 30.2 (2018): 1704388.	186	49	ZrPP-1-Co	FUNC	Liquid	Zr	none	none	metal	1.78	4	20	VIS	25	9	1	20	140	24	10.6333	CO
Chen, Er‐Xia, et al. "Acid and base resistant zirconium polyphenolate‐metalloporphyrin scaffolds for efficient CO2 photoreduction." Advanced Materials 30.2 (2018): 1704388.	187	49	ZrPP-1-Co	FUNC	Liquid	Zr	none	none	metal	1.78	4	20	VIS	25	6	1	20	140	24	7.44833	CO
Chen, Er‐Xia, et al. "Acid and base resistant zirconium polyphenolate‐metalloporphyrin scaffolds for efficient CO2 photoreduction." Advanced Materials 30.2 (2018): 1704388.	188	49	ZrPP-1-Co	FUNC	Liquid	Zr	none	none	metal	1.78	4	20	VIS	25	3	1	20	140	24	6.54667	CO
Chen, Er‐Xia, et al. "Acid and base resistant zirconium polyphenolate‐metalloporphyrin scaffolds for efficient CO2 photoreduction." Advanced Materials 30.2 (2018): 1704388.	189	50	ZrPP-1-Co	FUNC	Liquid	Zr	none	none	metal	1.78	4	6	VIS	25	15	1	20	140	24	13.3333	CO
Chen, Er‐Xia, et al. "Acid and base resistant zirconium polyphenolate‐metalloporphyrin scaffolds for efficient CO2 photoreduction." Advanced Materials 30.2 (2018): 1704388.	190	51	ZrPP-1-Co	FUNC	Liquid	Zr	none	none	metal	1.78	4	2	VIS	25	15	1	20	140	24	1.33333	CO
Chen, Er‐Xia, et al. "Acid and base resistant zirconium polyphenolate‐metalloporphyrin scaffolds for efficient CO2 photoreduction." Advanced Materials 30.2 (2018): 1704388.	191	52	ZrPP-1-Co	FUNC	Liquid	Zr	none	none	metal	1.78	4	0	VIS	25	15	1	20	140	24	1.2	CO
Cabrero-Antonino, María, et al. "Design of cost-efficient and photocatalytically active Zn-based MOFs decorated with Cu 2 O nanoparticles for CO 2 methanation." Chemical Communications 55.73 (2019): 10932-10935.	192	53	MOF(Zn)-1	PURE	Gas	Zn	none	none	none			0	UVVIS		2	0.25	215	95	12	3.959	CH4
Cabrero-Antonino, María, et al. "Design of cost-efficient and photocatalytically active Zn-based MOFs decorated with Cu 2 O nanoparticles for CO 2 methanation." Chemical Communications 55.73 (2019): 10932-10935.	193	53	MOF(Zn)-1	PURE	Gas	Zn	none	none	none			0	UVVIS		3	0.25	215	95	12	3.72433	CH4
Cabrero-Antonino, María, et al. "Design of cost-efficient and photocatalytically active Zn-based MOFs decorated with Cu 2 O nanoparticles for CO 2 methanation." Chemical Communications 55.73 (2019): 10932-10935.	194	53	MOF(Zn)-1	PURE	Gas	Zn	none	none	none			0	UVVIS		4	0.25	215	95	12	2.99675	CH4
Cabrero-Antonino, María, et al. "Design of cost-efficient and photocatalytically active Zn-based MOFs decorated with Cu 2 O nanoparticles for CO 2 methanation." Chemical Communications 55.73 (2019): 10932-10935.	195	53	MOF(Zn)-1	PURE	Gas	Zn	none	none	none			0	UVVIS		5	0.25	215	95	12	2.3378	CH4
Cabrero-Antonino, María, et al. "Design of cost-efficient and photocatalytically active Zn-based MOFs decorated with Cu 2 O nanoparticles for CO 2 methanation." Chemical Communications 55.73 (2019): 10932-10935.	196	53	MOF(Zn)-1	PURE	Gas	Zn	none	none	none			0	UVVIS		7	0.25	215	95	12	2.37857	CH4
Cabrero-Antonino, María, et al. "Design of cost-efficient and photocatalytically active Zn-based MOFs decorated with Cu 2 O nanoparticles for CO 2 methanation." Chemical Communications 55.73 (2019): 10932-10935.	197	53	MOF(Zn)-1	PURE	Gas	Zn	none	none	none			0	UVVIS		24	0.25	215	95	12	1.224	CH4
Cabrero-Antonino, María, et al. "Design of cost-efficient and photocatalytically active Zn-based MOFs decorated with Cu 2 O nanoparticles for CO 2 methanation." Chemical Communications 55.73 (2019): 10932-10935.	198	54	MOF(Zn)-2	PURE	Gas	Zn	none	none	none			0	UVVIS		2	0.25	215	95	12	2.81	CH4
Cabrero-Antonino, María, et al. "Design of cost-efficient and photocatalytically active Zn-based MOFs decorated with Cu 2 O nanoparticles for CO 2 methanation." Chemical Communications 55.73 (2019): 10932-10935.	199	54	MOF(Zn)-2	PURE	Gas	Zn	none	none	none			0	UVVIS		3	0.25	215	95	12	2.14667	CH4
Cabrero-Antonino, María, et al. "Design of cost-efficient and photocatalytically active Zn-based MOFs decorated with Cu 2 O nanoparticles for CO 2 methanation." Chemical Communications 55.73 (2019): 10932-10935.	200	54	MOF(Zn)-2	PURE	Gas	Zn	none	none	none			0	UVVIS		4	0.25	215	95	12	1.7575	CH4
Cabrero-Antonino, María, et al. "Design of cost-efficient and photocatalytically active Zn-based MOFs decorated with Cu 2 O nanoparticles for CO 2 methanation." Chemical Communications 55.73 (2019): 10932-10935.	201	54	MOF(Zn)-2	PURE	Gas	Zn	none	none	none			0	UVVIS		5	0.25	215	95	12	1.392	CH4
Cabrero-Antonino, María, et al. "Design of cost-efficient and photocatalytically active Zn-based MOFs decorated with Cu 2 O nanoparticles for CO 2 methanation." Chemical Communications 55.73 (2019): 10932-10935.	202	54	MOF(Zn)-2	PURE	Gas	Zn	none	none	none			0	UVVIS		7	0.25	215	95	12	1.12	CH4
Cabrero-Antonino, María, et al. "Design of cost-efficient and photocatalytically active Zn-based MOFs decorated with Cu 2 O nanoparticles for CO 2 methanation." Chemical Communications 55.73 (2019): 10932-10935.	203	54	MOF(Zn)-2	PURE	Gas	Zn	none	none	none			0	UVVIS		24	0.25	215	95	12	0.579583	CH4
Cabrero-Antonino, María, et al. "Design of cost-efficient and photocatalytically active Zn-based MOFs decorated with Cu 2 O nanoparticles for CO 2 methanation." Chemical Communications 55.73 (2019): 10932-10935.	204	55	Cu2O@MOF(Zn)-1	COMP	Gas	Zn	none	none	Cu2O			0	UVVIS		24	0.25	215	95	12	1.89708	CH4
Cabrero-Antonino, María, et al. "Design of cost-efficient and photocatalytically active Zn-based MOFs decorated with Cu 2 O nanoparticles for CO 2 methanation." Chemical Communications 55.73 (2019): 10932-10935.	205	55	Cu2O@MOF(Zn)-1	COMP	Gas	Zn	none	none	Cu2O			0	UVVIS		7	0.25	215	95	12	4.50429	CH4
Cabrero-Antonino, María, et al. "Design of cost-efficient and photocatalytically active Zn-based MOFs decorated with Cu 2 O nanoparticles for CO 2 methanation." Chemical Communications 55.73 (2019): 10932-10935.	206	55	Cu2O@MOF(Zn)-1	COMP	Gas	Zn	none	none	Cu2O			0	UVVIS		5	0.25	215	95	12	5.934	CH4
Cabrero-Antonino, María, et al. "Design of cost-efficient and photocatalytically active Zn-based MOFs decorated with Cu 2 O nanoparticles for CO 2 methanation." Chemical Communications 55.73 (2019): 10932-10935.	207	55	Cu2O@MOF(Zn)-1	COMP	Gas	Zn	none	none	Cu2O			0	UVVIS		3	0.25	215	95	12	8.88667	CH4
Cabrero-Antonino, María, et al. "Design of cost-efficient and photocatalytically active Zn-based MOFs decorated with Cu 2 O nanoparticles for CO 2 methanation." Chemical Communications 55.73 (2019): 10932-10935.	208	55	Cu2O@MOF(Zn)-1	COMP	Gas	Zn	none	none	Cu2O			0	UVVIS		2	0.25	215	95	12	9.905	CH4
Cabrero-Antonino, María, et al. "Design of cost-efficient and photocatalytically active Zn-based MOFs decorated with Cu 2 O nanoparticles for CO 2 methanation." Chemical Communications 55.73 (2019): 10932-10935.	209	56	Cu2O@MOF(Zn)-2	COMP	Gas	Zn	none	none	Cu2O			0	UVVIS		24	0.25	215	95	12	1.55583	CH4
Cabrero-Antonino, María, et al. "Design of cost-efficient and photocatalytically active Zn-based MOFs decorated with Cu 2 O nanoparticles for CO 2 methanation." Chemical Communications 55.73 (2019): 10932-10935.	210	56	Cu2O@MOF(Zn)-2	COMP	Gas	Zn	none	none	Cu2O			0	UVVIS		7	0.25	215	95	12	3.08143	CH4
Cabrero-Antonino, María, et al. "Design of cost-efficient and photocatalytically active Zn-based MOFs decorated with Cu 2 O nanoparticles for CO 2 methanation." Chemical Communications 55.73 (2019): 10932-10935.	211	56	Cu2O@MOF(Zn)-2	COMP	Gas	Zn	none	none	Cu2O			0	UVVIS		5	0.25	215	95	12	3.962	CH4
Cabrero-Antonino, María, et al. "Design of cost-efficient and photocatalytically active Zn-based MOFs decorated with Cu 2 O nanoparticles for CO 2 methanation." Chemical Communications 55.73 (2019): 10932-10935.	212	56	Cu2O@MOF(Zn)-2	COMP	Gas	Zn	none	none	Cu2O			0	UVVIS		3	0.25	215	95	12	4.52667	CH4
Cabrero-Antonino, María, et al. "Design of cost-efficient and photocatalytically active Zn-based MOFs decorated with Cu 2 O nanoparticles for CO 2 methanation." Chemical Communications 55.73 (2019): 10932-10935.	213	56	Cu2O@MOF(Zn)-2	COMP	Gas	Zn	none	none	Cu2O			0	UVVIS		2	0.25	215	95	12	5.08	CH4
Crake, Angus, et al. "CO2 capture and photocatalytic reduction using bifunctional TiO2/MOF nanocomposites under UV–vis irradiation." Applied Catalysis B: Environmental 210 (2017): 131-140.	214	57	TiO2	COMP	Gas	none	none	none	TiO2			0	UVVIS	132	6	1.13		180	24	2.85	CO
Crake, Angus, et al. "CO2 capture and photocatalytic reduction using bifunctional TiO2/MOF nanocomposites under UV–vis irradiation." Applied Catalysis B: Environmental 210 (2017): 131-140.	215	58	1-TiMOF	COMP	Gas	Zr	none	none	metal			0	UVVIS	132	6	1.13				3.74	CO
Crake, Angus, et al. "CO2 capture and photocatalytic reduction using bifunctional TiO2/MOF nanocomposites under UV–vis irradiation." Applied Catalysis B: Environmental 210 (2017): 131-140.	216	59	2-TiMOF	COMP	Gas	Zr	none	none	metal			0	UVVIS	132	6	1.13				4.24	CO
Crake, Angus, et al. "CO2 capture and photocatalytic reduction using bifunctional TiO2/MOF nanocomposites under UV–vis irradiation." Applied Catalysis B: Environmental 210 (2017): 131-140.	217	60	3-TiMOF	COMP	Gas	Zr	none	none	metal			0	UVVIS	132	6	1.13				3.37	CO
Crake, Angus, et al. "CO2 capture and photocatalytic reduction using bifunctional TiO2/MOF nanocomposites under UV–vis irradiation." Applied Catalysis B: Environmental 210 (2017): 131-140.	218	61	4-TiMOF	COMP	Gas	Zr	none	none	metal			0	UVVIS	132	6	1.13				2.85	CO
Crake, Angus, et al. "CO2 capture and photocatalytic reduction using bifunctional TiO2/MOF nanocomposites under UV–vis irradiation." Applied Catalysis B: Environmental 210 (2017): 131-140.	219	62	NH2-UiO-66	COMP	Gas	Zr	none	present	none			0	UVVIS	132	6	1.13		150	24	1.5	CO
Wang, Dengke, et al. "Fe-based MOFs for photocatalytic CO2 reduction: role of coordination unsaturated sites and dual excitation pathways." Acs Catalysis 4.12 (2014): 4254-4260.	220	63	MIL-101(Fe)	PURE	Liquid	other	none	none	none		0.980392	1.96078	VIS		1	1	0	110	24	234.8	HCOOH
Wang, Dengke, et al. "Fe-based MOFs for photocatalytic CO2 reduction: role of coordination unsaturated sites and dual excitation pathways." Acs Catalysis 4.12 (2014): 4254-4260.	221	63	MIL-101(Fe)	PURE	Liquid	other	none	none	none		0.980392	1.96078	VIS		2	1	0	110	24	257.7	HCOOH
Wang, Dengke, et al. "Fe-based MOFs for photocatalytic CO2 reduction: role of coordination unsaturated sites and dual excitation pathways." Acs Catalysis 4.12 (2014): 4254-4260.	222	63	MIL-101(Fe)	PURE	Liquid	other	none	none	none		0.980392	1.96078	VIS		4	1	0	110	24	189	HCOOH
Wang, Dengke, et al. "Fe-based MOFs for photocatalytic CO2 reduction: role of coordination unsaturated sites and dual excitation pathways." Acs Catalysis 4.12 (2014): 4254-4260.	223	63	MIL-101(Fe)	PURE	Liquid	other	none	none	none		0.980392	1.96078	VIS		6	1	0	110	24	169.933	HCOOH
Wang, Dengke, et al. "Fe-based MOFs for photocatalytic CO2 reduction: role of coordination unsaturated sites and dual excitation pathways." Acs Catalysis 4.12 (2014): 4254-4260.	224	63	MIL-101(Fe)	PURE	Liquid	other	none	none	none		0.980392	1.96078	VIS		8	1	0	110	24	150.35	HCOOH
Wang, Dengke, et al. "Fe-based MOFs for photocatalytic CO2 reduction: role of coordination unsaturated sites and dual excitation pathways." Acs Catalysis 4.12 (2014): 4254-4260.	225	64	MIL-53(Fe)	PURE	Liquid	other	none	none	none		0.980392	1.96078	VIS		8	1	0	170	24	74.2	HCOOH
Wang, Dengke, et al. "Fe-based MOFs for photocatalytic CO2 reduction: role of coordination unsaturated sites and dual excitation pathways." Acs Catalysis 4.12 (2014): 4254-4260.	226	65	MIL-88(Fe)	PURE	Liquid	other	none	none	none		0.980392	1.96078	VIS		8	1	0	100	12	22.5	HCOOH
Wang, Dengke, et al. "Fe-based MOFs for photocatalytic CO2 reduction: role of coordination unsaturated sites and dual excitation pathways." Acs Catalysis 4.12 (2014): 4254-4260.	227	66	NH2-MIL-101(Fe)	FUNC	Liquid	other	none	present	none		0.833333	16.6667	VIS		8	1	0	110	24	445	HCOOH
Wang, Dengke, et al. "Fe-based MOFs for photocatalytic CO2 reduction: role of coordination unsaturated sites and dual excitation pathways." Acs Catalysis 4.12 (2014): 4254-4260.	228	67	NH2-MIL-53(Fe)	FUNC	Liquid	other	none	present	none		0.833333	16.6667	VIS		8	1	0	170	24	116.2	HCOOH
Wang, Dengke, et al. "Fe-based MOFs for photocatalytic CO2 reduction: role of coordination unsaturated sites and dual excitation pathways." Acs Catalysis 4.12 (2014): 4254-4260.	229	68	NH2-MIL-88(Fe)	FUNC	Liquid	other	none	present	none		0.833333	16.6667	VIS		8	1	0	100	12	75	HCOOH
Xie, Yue, et al. "Creating chemisorption sites for enhanced CO2 photoreduction activity through alkylamine modification of MIL-101-Cr." ACS applied materials & interfaces 11.30 (2019): 27017-27023.	230	69	MIL-101-DETA	FUNC	Liquid	other	none	present	none		1.66667	50	UVVIS	470	2	0.6		60	12	1.3	CO
Xie, Yue, et al. "Creating chemisorption sites for enhanced CO2 photoreduction activity through alkylamine modification of MIL-101-Cr." ACS applied materials & interfaces 11.30 (2019): 27017-27023.	231	69	MIL-101-DETA	FUNC	Liquid	other	none	present	none		1.66667	50	UVVIS	470	3	0.6		60	12	3.926	CO
Xie, Yue, et al. "Creating chemisorption sites for enhanced CO2 photoreduction activity through alkylamine modification of MIL-101-Cr." ACS applied materials & interfaces 11.30 (2019): 27017-27023.	232	69	MIL-101-DETA	FUNC	Liquid	other	none	present	none		1.66667	50	UVVIS	470	4	0.6		60	12	6.485	CO
Xie, Yue, et al. "Creating chemisorption sites for enhanced CO2 photoreduction activity through alkylamine modification of MIL-101-Cr." ACS applied materials & interfaces 11.30 (2019): 27017-27023.	233	69	MIL-101-DETA	FUNC	Liquid	other	none	present	none		1.66667	50	UVVIS	470	5	0.6		60	12	8.302	CO
Xie, Yue, et al. "Creating chemisorption sites for enhanced CO2 photoreduction activity through alkylamine modification of MIL-101-Cr." ACS applied materials & interfaces 11.30 (2019): 27017-27023.	234	69	MIL-101-DETA	FUNC	Liquid	other	none	present	none		1.66667	50	UVVIS	470	6	0.6		60	12	10.627	CO
Xie, Yue, et al. "Creating chemisorption sites for enhanced CO2 photoreduction activity through alkylamine modification of MIL-101-Cr." ACS applied materials & interfaces 11.30 (2019): 27017-27023.	235	69	MIL-101-DETA	FUNC	Liquid	other	none	present	none		1.66667	50	UVVIS	470	7	0.6		60	12	12.362	CO
Xie, Yue, et al. "Creating chemisorption sites for enhanced CO2 photoreduction activity through alkylamine modification of MIL-101-Cr." ACS applied materials & interfaces 11.30 (2019): 27017-27023.	236	69	MIL-101-DETA	FUNC	Liquid	other	none	present	none		1.66667	50	UVVIS	470	8	0.6		60	12	14.916	CO
Xie, Yue, et al. "Creating chemisorption sites for enhanced CO2 photoreduction activity through alkylamine modification of MIL-101-Cr." ACS applied materials & interfaces 11.30 (2019): 27017-27023.	237	69	MIL-101-DETA	FUNC	Liquid	other	none	present	none		1.66667	50	UVVIS	470	9	0.6		60	12	18.648	CO
Xie, Yue, et al. "Creating chemisorption sites for enhanced CO2 photoreduction activity through alkylamine modification of MIL-101-Cr." ACS applied materials & interfaces 11.30 (2019): 27017-27023.	238	69	MIL-101-DETA	FUNC	Liquid	other	none	present	none		1.66667	50	UVVIS	470	10	0.6		60	12	26.8	CO
Xie, Yue, et al. "Creating chemisorption sites for enhanced CO2 photoreduction activity through alkylamine modification of MIL-101-Cr." ACS applied materials & interfaces 11.30 (2019): 27017-27023.	239	70	MIL-101-TETA	FUNC	Liquid	other	none	present	none		1.66667	50	UVVIS	470	2	0.6		60	12	2.746	CO
Xie, Yue, et al. "Creating chemisorption sites for enhanced CO2 photoreduction activity through alkylamine modification of MIL-101-Cr." ACS applied materials & interfaces 11.30 (2019): 27017-27023.	240	70	MIL-101-TETA	FUNC	Liquid	other	none	present	none		1.66667	50	UVVIS	470	3	0.6		60	12	4.438	CO
Xie, Yue, et al. "Creating chemisorption sites for enhanced CO2 photoreduction activity through alkylamine modification of MIL-101-Cr." ACS applied materials & interfaces 11.30 (2019): 27017-27023.	241	70	MIL-101-TETA	FUNC	Liquid	other	none	present	none		1.66667	50	UVVIS	470	4	0.6		60	12	5.425	CO
Xie, Yue, et al. "Creating chemisorption sites for enhanced CO2 photoreduction activity through alkylamine modification of MIL-101-Cr." ACS applied materials & interfaces 11.30 (2019): 27017-27023.	242	70	MIL-101-TETA	FUNC	Liquid	other	none	present	none		1.66667	50	UVVIS	470	5	0.6		60	12	7.963	CO
Xie, Yue, et al. "Creating chemisorption sites for enhanced CO2 photoreduction activity through alkylamine modification of MIL-101-Cr." ACS applied materials & interfaces 11.30 (2019): 27017-27023.	243	70	MIL-101-TETA	FUNC	Liquid	other	none	present	none		1.66667	50	UVVIS	470	6	0.6		60	12	9.87	CO
Xie, Yue, et al. "Creating chemisorption sites for enhanced CO2 photoreduction activity through alkylamine modification of MIL-101-Cr." ACS applied materials & interfaces 11.30 (2019): 27017-27023.	244	70	MIL-101-TETA	FUNC	Liquid	other	none	present	none		1.66667	50	UVVIS	470	7	0.6		60	12	11.382	CO
Xie, Yue, et al. "Creating chemisorption sites for enhanced CO2 photoreduction activity through alkylamine modification of MIL-101-Cr." ACS applied materials & interfaces 11.30 (2019): 27017-27023.	245	70	MIL-101-TETA	FUNC	Liquid	other	none	present	none		1.66667	50	UVVIS	470	8	0.6		60	12	13.729	CO
Xie, Yue, et al. "Creating chemisorption sites for enhanced CO2 photoreduction activity through alkylamine modification of MIL-101-Cr." ACS applied materials & interfaces 11.30 (2019): 27017-27023.	246	70	MIL-101-TETA	FUNC	Liquid	other	none	present	none		1.66667	50	UVVIS	470	9	0.6		60	12	15.675	CO
Xie, Yue, et al. "Creating chemisorption sites for enhanced CO2 photoreduction activity through alkylamine modification of MIL-101-Cr." ACS applied materials & interfaces 11.30 (2019): 27017-27023.	247	70	MIL-101-TETA	FUNC	Liquid	other	none	present	none		1.66667	50	UVVIS	470	10	0.6		60	12	18.05	CO
Xie, Yue, et al. "Creating chemisorption sites for enhanced CO2 photoreduction activity through alkylamine modification of MIL-101-Cr." ACS applied materials & interfaces 11.30 (2019): 27017-27023.	248	71	MIL-101-EN	FUNC	Liquid	other	none	present	none	2.43	1.66667	50	UVVIS	470	1	0.6		60	12	7.51	CO
Xie, Yue, et al. "Creating chemisorption sites for enhanced CO2 photoreduction activity through alkylamine modification of MIL-101-Cr." ACS applied materials & interfaces 11.30 (2019): 27017-27023.	249	71	MIL-101-EN	FUNC	Liquid	other	none	present	none	2.43	1.66667	50	UVVIS	470	2	0.6		60	12	10.84	CO
Xie, Yue, et al. "Creating chemisorption sites for enhanced CO2 photoreduction activity through alkylamine modification of MIL-101-Cr." ACS applied materials & interfaces 11.30 (2019): 27017-27023.	250	71	MIL-101-EN	FUNC	Liquid	other	none	present	none	2.43	1.66667	50	UVVIS	470	3	0.6		60	12	15.004	CO
Xie, Yue, et al. "Creating chemisorption sites for enhanced CO2 photoreduction activity through alkylamine modification of MIL-101-Cr." ACS applied materials & interfaces 11.30 (2019): 27017-27023.	251	71	MIL-101-EN	FUNC	Liquid	other	none	present	none	2.43	1.66667	50	UVVIS	470	4	0.6		60	12	20.168	CO
Xie, Yue, et al. "Creating chemisorption sites for enhanced CO2 photoreduction activity through alkylamine modification of MIL-101-Cr." ACS applied materials & interfaces 11.30 (2019): 27017-27023.	252	71	MIL-101-EN	FUNC	Liquid	other	none	present	none	2.43	1.66667	50	UVVIS	470	5	0.6		60	12	24.535	CO
Xie, Yue, et al. "Creating chemisorption sites for enhanced CO2 photoreduction activity through alkylamine modification of MIL-101-Cr." ACS applied materials & interfaces 11.30 (2019): 27017-27023.	253	71	MIL-101-EN	FUNC	Liquid	other	none	present	none	2.43	1.66667	50	UVVIS	470	6	0.6		60	12	29.047	CO
Xie, Yue, et al. "Creating chemisorption sites for enhanced CO2 photoreduction activity through alkylamine modification of MIL-101-Cr." ACS applied materials & interfaces 11.30 (2019): 27017-27023.	254	71	MIL-101-EN	FUNC	Liquid	other	none	present	none	2.43	1.66667	50	UVVIS	470	7	0.6		60	12	34.607	CO
Xie, Yue, et al. "Creating chemisorption sites for enhanced CO2 photoreduction activity through alkylamine modification of MIL-101-Cr." ACS applied materials & interfaces 11.30 (2019): 27017-27023.	255	71	MIL-101-EN	FUNC	Liquid	other	none	present	none	2.43	1.66667	50	UVVIS	470	8	0.6		60	12	36.412	CO
Xie, Yue, et al. "Creating chemisorption sites for enhanced CO2 photoreduction activity through alkylamine modification of MIL-101-Cr." ACS applied materials & interfaces 11.30 (2019): 27017-27023.	256	71	MIL-101-EN	FUNC	Liquid	other	none	present	none	2.43	1.66667	50	UVVIS	470	9	0.6		60	12	40.336	CO
Xie, Yue, et al. "Creating chemisorption sites for enhanced CO2 photoreduction activity through alkylamine modification of MIL-101-Cr." ACS applied materials & interfaces 11.30 (2019): 27017-27023.	257	71	MIL-101-EN	FUNC	Liquid	other	none	present	none	2.43	1.66667	50	UVVIS	470	10	0.6		60	12	49	CO
Sun, Dengrong, et al. "Studies on photocatalytic CO2 reduction over NH2‐Uio‐66 (Zr) and its derivatives: towards a better understanding of photocatalysis on metal–organic frameworks." Chemistry–A European Journal 19.42 (2013): 14279-14285.	258	72	NH2-UiO-66(Zr)	FUNC	Liquid	Zr	none	present	none		0.833333	16.6667	VIS		2	1	30	120	24	41.49	HCOOH
Sun, Dengrong, et al. "Studies on photocatalytic CO2 reduction over NH2‐Uio‐66 (Zr) and its derivatives: towards a better understanding of photocatalysis on metal–organic frameworks." Chemistry–A European Journal 19.42 (2013): 14279-14285.	259	72	NH2-UiO-66(Zr)	FUNC	Liquid	Zr	none	present	none		0.833333	16.6667	VIS		4	1	30	120	24	35.105	HCOOH
Sun, Dengrong, et al. "Studies on photocatalytic CO2 reduction over NH2‐Uio‐66 (Zr) and its derivatives: towards a better understanding of photocatalysis on metal–organic frameworks." Chemistry–A European Journal 19.42 (2013): 14279-14285.	260	72	NH2-UiO-66(Zr)	FUNC	Liquid	Zr	none	present	none		0.833333	16.6667	VIS		6	1	30	120	24	30.4967	HCOOH
Sun, Dengrong, et al. "Studies on photocatalytic CO2 reduction over NH2‐Uio‐66 (Zr) and its derivatives: towards a better understanding of photocatalysis on metal–organic frameworks." Chemistry–A European Journal 19.42 (2013): 14279-14285.	261	72	NH2-UiO-66(Zr)	FUNC	Liquid	Zr	none	present	none		0.833333	16.6667	VIS		8	1	30	120	24	28.1925	HCOOH
Sun, Dengrong, et al. "Studies on photocatalytic CO2 reduction over NH2‐Uio‐66 (Zr) and its derivatives: towards a better understanding of photocatalysis on metal–organic frameworks." Chemistry–A European Journal 19.42 (2013): 14279-14285.	262	72	NH2-UiO-66(Zr)	FUNC	Liquid	Zr	none	present	none		0.833333	16.6667	VIS		10	1	30	120	24	26.064	HCOOH
Sun, Dengrong, et al. "Studies on photocatalytic CO2 reduction over NH2‐Uio‐66 (Zr) and its derivatives: towards a better understanding of photocatalysis on metal–organic frameworks." Chemistry–A European Journal 19.42 (2013): 14279-14285.	263	73	(NH2)/(NH2)2-UiO-66(Zr)	FUNC	Liquid	Zr	none	present	none		0.833333	16.6667	VIS		2	1	30	120	24	73.4	HCOOH
Sun, Dengrong, et al. "Studies on photocatalytic CO2 reduction over NH2‐Uio‐66 (Zr) and its derivatives: towards a better understanding of photocatalysis on metal–organic frameworks." Chemistry–A European Journal 19.42 (2013): 14279-14285.	264	73	(NH2)/(NH2)2-UiO-66(Zr)	FUNC	Liquid	Zr	none	present	none		0.833333	16.6667	VIS		4	1	30	120	24	58.775	HCOOH
Sun, Dengrong, et al. "Studies on photocatalytic CO2 reduction over NH2‐Uio‐66 (Zr) and its derivatives: towards a better understanding of photocatalysis on metal–organic frameworks." Chemistry–A European Journal 19.42 (2013): 14279-14285.	265	73	(NH2)/(NH2)2-UiO-66(Zr)	FUNC	Liquid	Zr	none	present	none		0.833333	16.6667	VIS		6	1	30	120	24	50.8867	HCOOH
Sun, Dengrong, et al. "Studies on photocatalytic CO2 reduction over NH2‐Uio‐66 (Zr) and its derivatives: towards a better understanding of photocatalysis on metal–organic frameworks." Chemistry–A European Journal 19.42 (2013): 14279-14285.	266	73	(NH2)/(NH2)2-UiO-66(Zr)	FUNC	Liquid	Zr	none	present	none		0.833333	16.6667	VIS		8	1	30	120	24	46.01	HCOOH
Sun, Dengrong, et al. "Studies on photocatalytic CO2 reduction over NH2‐Uio‐66 (Zr) and its derivatives: towards a better understanding of photocatalysis on metal–organic frameworks." Chemistry–A European Journal 19.42 (2013): 14279-14285.	267	73	(NH2)/(NH2)2-UiO-66(Zr)	FUNC	Liquid	Zr	none	present	none		0.833333	16.6667	VIS		10	1	30	120	24	41.382	HCOOH
Li, Rui, et al. "Integration of an inorganic semiconductor with a metal–organic framework: a platform for enhanced gaseous photocatalytic reactions." Advanced Materials 26.28 (2014): 4783-4788.	268	74	TiO2 on HKUST-1	COMP	Gas	none	none	none	TiO2	2.91529	0.3	0	UV	1000	4	0.25	40	180	12	2.64	CH4
Li, Rui, et al. "Integration of an inorganic semiconductor with a metal–organic framework: a platform for enhanced gaseous photocatalytic reactions." Advanced Materials 26.28 (2014): 4783-4788.	269	75	Bare HKUST-1	COMP	Gas	none	none	none	none	3.304	0.3	0	UV	1000	4	1.5	40	180	12	2.81	H2
Sun, Dengrong, et al. "Noble metals can have different effects on photocatalysis over metal–organic frameworks (MOFs): a case study on M/NH2‐MIL‐125 (Ti)(M= Pt and Au)." Chemistry–A European Journal 20.16 (2014): 4780-4788.	270	76	NH2-MIL-125(Ti)	FUNC	Liquid	other	none	present	none		0.833333	16.6667	VIS		8	1	30	150	72	16.3	HCOOH
Sun, Dengrong, et al. "Noble metals can have different effects on photocatalysis over metal–organic frameworks (MOFs): a case study on M/NH2‐MIL‐125 (Ti)(M= Pt and Au)." Chemistry–A European Journal 20.16 (2014): 4780-4788.	271	76	NH2-MIL-125(Ti)	FUNC	Liquid	other	none	present	none		0.833333	16.6667	VIS		7	1	30	150	72	27.6886	HCOOH
Sun, Dengrong, et al. "Noble metals can have different effects on photocatalysis over metal–organic frameworks (MOFs): a case study on M/NH2‐MIL‐125 (Ti)(M= Pt and Au)." Chemistry–A European Journal 20.16 (2014): 4780-4788.	272	76	NH2-MIL-125(Ti)	FUNC	Liquid	other	none	present	none		0.833333	16.6667	VIS		6	1	30	150	72	28.5967	HCOOH
Sun, Dengrong, et al. "Noble metals can have different effects on photocatalysis over metal–organic frameworks (MOFs): a case study on M/NH2‐MIL‐125 (Ti)(M= Pt and Au)." Chemistry–A European Journal 20.16 (2014): 4780-4788.	273	76	NH2-MIL-125(Ti)	FUNC	Liquid	other	none	present	none		0.833333	16.6667	VIS		5	1	30	150	72	29.396	HCOOH
Sun, Dengrong, et al. "Noble metals can have different effects on photocatalysis over metal–organic frameworks (MOFs): a case study on M/NH2‐MIL‐125 (Ti)(M= Pt and Au)." Chemistry–A European Journal 20.16 (2014): 4780-4788.	274	76	NH2-MIL-125(Ti)	FUNC	Liquid	other	none	present	none		0.833333	16.6667	VIS		4	1	30	150	72	29.57	HCOOH
Sun, Dengrong, et al. "Noble metals can have different effects on photocatalysis over metal–organic frameworks (MOFs): a case study on M/NH2‐MIL‐125 (Ti)(M= Pt and Au)." Chemistry–A European Journal 20.16 (2014): 4780-4788.	275	76	NH2-MIL-125(Ti)	FUNC	Liquid	other	none	present	none		0.833333	16.6667	VIS		3	1	30	150	72	31.4267	HCOOH
Sun, Dengrong, et al. "Noble metals can have different effects on photocatalysis over metal–organic frameworks (MOFs): a case study on M/NH2‐MIL‐125 (Ti)(M= Pt and Au)." Chemistry–A European Journal 20.16 (2014): 4780-4788.	276	76	NH2-MIL-125(Ti)	FUNC	Liquid	other	none	present	none		0.833333	16.6667	VIS		2	1	30	150	72	32.79	HCOOH
Sun, Dengrong, et al. "Noble metals can have different effects on photocatalysis over metal–organic frameworks (MOFs): a case study on M/NH2‐MIL‐125 (Ti)(M= Pt and Au)." Chemistry–A European Journal 20.16 (2014): 4780-4788.	277	76	NH2-MIL-125(Ti)	FUNC	Liquid	other	none	present	none		0.833333	16.6667	VIS		1	1	30	150	72	32.2	HCOOH
Sun, Dengrong, et al. "Noble metals can have different effects on photocatalysis over metal–organic frameworks (MOFs): a case study on M/NH2‐MIL‐125 (Ti)(M= Pt and Au)." Chemistry–A European Journal 20.16 (2014): 4780-4788.	278	77	Pt-NH2-MIL-125(Ti)	EXCH	Liquid	other	present	present	none		0.833333	16.6667	VIS		8	1	30	150	72	616.9	H2
Sun, Dengrong, et al. "Noble metals can have different effects on photocatalysis over metal–organic frameworks (MOFs): a case study on M/NH2‐MIL‐125 (Ti)(M= Pt and Au)." Chemistry–A European Journal 20.16 (2014): 4780-4788.	279	77	Pt-NH2-MIL-125(Ti)	EXCH	Liquid	other	present	present	none		0.833333	16.6667	VIS		7	1	30	150	72	619.783	H2
Sun, Dengrong, et al. "Noble metals can have different effects on photocatalysis over metal–organic frameworks (MOFs): a case study on M/NH2‐MIL‐125 (Ti)(M= Pt and Au)." Chemistry–A European Journal 20.16 (2014): 4780-4788.	280	77	Pt-NH2-MIL-125(Ti)	EXCH	Liquid	other	present	present	none		0.833333	16.6667	VIS		6	1	30	150	72	612.66	H2
Sun, Dengrong, et al. "Noble metals can have different effects on photocatalysis over metal–organic frameworks (MOFs): a case study on M/NH2‐MIL‐125 (Ti)(M= Pt and Au)." Chemistry–A European Journal 20.16 (2014): 4780-4788.	281	77	Pt-NH2-MIL-125(Ti)	EXCH	Liquid	other	present	present	none		0.833333	16.6667	VIS		5	1	30	150	72	586.456	H2
Sun, Dengrong, et al. "Noble metals can have different effects on photocatalysis over metal–organic frameworks (MOFs): a case study on M/NH2‐MIL‐125 (Ti)(M= Pt and Au)." Chemistry–A European Journal 20.16 (2014): 4780-4788.	282	77	Pt-NH2-MIL-125(Ti)	EXCH	Liquid	other	present	present	none		0.833333	16.6667	VIS		4	1	30	150	72	574.665	H2
Sun, Dengrong, et al. "Noble metals can have different effects on photocatalysis over metal–organic frameworks (MOFs): a case study on M/NH2‐MIL‐125 (Ti)(M= Pt and Au)." Chemistry–A European Journal 20.16 (2014): 4780-4788.	283	77	Pt-NH2-MIL-125(Ti)	EXCH	Liquid	other	present	present	none		0.833333	16.6667	VIS		3	1	30	150	72	545.78	H2
Sun, Dengrong, et al. "Noble metals can have different effects on photocatalysis over metal–organic frameworks (MOFs): a case study on M/NH2‐MIL‐125 (Ti)(M= Pt and Au)." Chemistry–A European Journal 20.16 (2014): 4780-4788.	284	77	Pt-NH2-MIL-125(Ti)	EXCH	Liquid	other	present	present	none		0.833333	16.6667	VIS		2	1	30	150	72	504.42	H2
Sun, Dengrong, et al. "Noble metals can have different effects on photocatalysis over metal–organic frameworks (MOFs): a case study on M/NH2‐MIL‐125 (Ti)(M= Pt and Au)." Chemistry–A European Journal 20.16 (2014): 4780-4788.	285	77	Pt-NH2-MIL-125(Ti)	EXCH	Liquid	other	present	present	none		0.833333	16.6667	VIS		1	1	30	150	72	551.4	H2
Sun, Dengrong, et al. "Noble metals can have different effects on photocatalysis over metal–organic frameworks (MOFs): a case study on M/NH2‐MIL‐125 (Ti)(M= Pt and Au)." Chemistry–A European Journal 20.16 (2014): 4780-4788.	286	78	Au-NH2-MIL-125(Ti)	EXCH	Liquid	other	present	present	none		0.833333	16.6667	VIS		8	1	30	150	72	116.8	H2
Sun, Dengrong, et al. "Noble metals can have different effects on photocatalysis over metal–organic frameworks (MOFs): a case study on M/NH2‐MIL‐125 (Ti)(M= Pt and Au)." Chemistry–A European Journal 20.16 (2014): 4780-4788.	287	78	Au-NH2-MIL-125(Ti)	EXCH	Liquid	other	present	present	none		0.833333	16.6667	VIS		7	1	30	150	72	129.66	H2
Sun, Dengrong, et al. "Noble metals can have different effects on photocatalysis over metal–organic frameworks (MOFs): a case study on M/NH2‐MIL‐125 (Ti)(M= Pt and Au)." Chemistry–A European Journal 20.16 (2014): 4780-4788.	288	78	Au-NH2-MIL-125(Ti)	EXCH	Liquid	other	present	present	none		0.833333	16.6667	VIS		6	1	30	150	72	133.267	H2
Sun, Dengrong, et al. "Noble metals can have different effects on photocatalysis over metal–organic frameworks (MOFs): a case study on M/NH2‐MIL‐125 (Ti)(M= Pt and Au)." Chemistry–A European Journal 20.16 (2014): 4780-4788.	289	78	Au-NH2-MIL-125(Ti)	EXCH	Liquid	other	present	present	none		0.833333	16.6667	VIS		5	1	30	150	72	140.396	H2
Sun, Dengrong, et al. "Noble metals can have different effects on photocatalysis over metal–organic frameworks (MOFs): a case study on M/NH2‐MIL‐125 (Ti)(M= Pt and Au)." Chemistry–A European Journal 20.16 (2014): 4780-4788.	290	78	Au-NH2-MIL-125(Ti)	EXCH	Liquid	other	present	present	none		0.833333	16.6667	VIS		4	1	30	150	72	136.34	H2
Sun, Dengrong, et al. "Noble metals can have different effects on photocatalysis over metal–organic frameworks (MOFs): a case study on M/NH2‐MIL‐125 (Ti)(M= Pt and Au)." Chemistry–A European Journal 20.16 (2014): 4780-4788.	291	78	Au-NH2-MIL-125(Ti)	EXCH	Liquid	other	present	present	none		0.833333	16.6667	VIS		3	1	30	150	72	140.507	H2
Sun, Dengrong, et al. "Noble metals can have different effects on photocatalysis over metal–organic frameworks (MOFs): a case study on M/NH2‐MIL‐125 (Ti)(M= Pt and Au)." Chemistry–A European Journal 20.16 (2014): 4780-4788.	292	78	Au-NH2-MIL-125(Ti)	EXCH	Liquid	other	present	present	none		0.833333	16.6667	VIS		2	1	30	150	72	170.87	H2
Sun, Dengrong, et al. "Noble metals can have different effects on photocatalysis over metal–organic frameworks (MOFs): a case study on M/NH2‐MIL‐125 (Ti)(M= Pt and Au)." Chemistry–A European Journal 20.16 (2014): 4780-4788.	293	78	Au-NH2-MIL-125(Ti)	EXCH	Liquid	other	present	present	none		0.833333	16.6667	VIS		1	1	30	150	72	181.38	H2
Sun, Dengrong, et al. "Construction of a supported Ru complex on bifunctional MOF-253 for photocatalytic CO 2 reduction under visible light." Chemical Communications 51.13 (2015): 2645-2648.	294	79	Ru(5,50 -dcbpy)(CO)2Cl2	FUNC	Liquid	none	present	none	metal		0.833333	9.09091	VIS		8	1				36.3	CO
Sun, Dengrong, et al. "Construction of a supported Ru complex on bifunctional MOF-253 for photocatalytic CO 2 reduction under visible light." Chemical Communications 51.13 (2015): 2645-2648.	295	80	MOF-253-Ru(CO)2Cl2	FUNC	Liquid	other	present	none	metal		0.833333	9.09091	VIS		8	1		200	12	65.5	CO
Sun, Dengrong, et al. "Construction of a supported Ru complex on bifunctional MOF-253 for photocatalytic CO 2 reduction under visible light." Chemical Communications 51.13 (2015): 2645-2648.	296	80	MOF-253-Ru(CO)2Cl2	FUNC	Liquid	other	present	none	metal		0.833333	9.09091	VIS		6	1		200	12	75.5	CO
Sun, Dengrong, et al. "Construction of a supported Ru complex on bifunctional MOF-253 for photocatalytic CO 2 reduction under visible light." Chemical Communications 51.13 (2015): 2645-2648.	297	80	MOF-253-Ru(CO)2Cl2	FUNC	Liquid	other	present	none	metal		0.833333	9.09091	VIS		4	1		200	12	104.05	CO
Sun, Dengrong, et al. "Construction of a supported Ru complex on bifunctional MOF-253 for photocatalytic CO 2 reduction under visible light." Chemical Communications 51.13 (2015): 2645-2648.	298	80	MOF-253-Ru(CO)2Cl2	FUNC	Liquid	other	present	none	metal		0.833333	9.09091	VIS		2	1		200	12	176.7	CO
Sun, Dengrong, et al. "Construction of a supported Ru complex on bifunctional MOF-253 for photocatalytic CO 2 reduction under visible light." Chemical Communications 51.13 (2015): 2645-2648.	299	81	Photosensitized Ru(5,50 -dcbpy)(CO)2Cl2	FUNC	Liquid	other	present	none	metal		0.833333	9.09091	VIS		8	1				322.1	HCOOH
Zhang, Huabin, et al. "Efficient visible‐light‐driven carbon dioxide reduction by a single‐atom implanted metal–organic framework." Angewandte Chemie 128.46 (2016): 14522-14526.	300	82	MOF-525	PURE	Liquid	Zr	none	none	none		1	20	VIS	330	6	1	160	80	72	70.22	CO
Zhang, Huabin, et al. "Efficient visible‐light‐driven carbon dioxide reduction by a single‐atom implanted metal–organic framework." Angewandte Chemie 128.46 (2016): 14522-14526.	301	82	MOF-525	PURE	Liquid	Zr	none	none	none		1	20	VIS	330	5	1	160	80	72	72.9	CO
Zhang, Huabin, et al. "Efficient visible‐light‐driven carbon dioxide reduction by a single‐atom implanted metal–organic framework." Angewandte Chemie 128.46 (2016): 14522-14526.	302	82	MOF-525	PURE	Liquid	Zr	none	none	none		1	20	VIS	330	4	1	160	80	72	74.375	CO
Zhang, Huabin, et al. "Efficient visible‐light‐driven carbon dioxide reduction by a single‐atom implanted metal–organic framework." Angewandte Chemie 128.46 (2016): 14522-14526.	303	82	MOF-525	PURE	Liquid	Zr	none	none	none		1	20	VIS	330	3	1	160	80	72	81.5	CO
Zhang, Huabin, et al. "Efficient visible‐light‐driven carbon dioxide reduction by a single‐atom implanted metal–organic framework." Angewandte Chemie 128.46 (2016): 14522-14526.	304	82	MOF-525	PURE	Liquid	Zr	none	none	none		1	20	VIS	330	2	1	160	80	72	91.25	CO
Zhang, Huabin, et al. "Efficient visible‐light‐driven carbon dioxide reduction by a single‐atom implanted metal–organic framework." Angewandte Chemie 128.46 (2016): 14522-14526.	305	82	MOF-525	PURE	Liquid	Zr	none	none	none		1	20	VIS	330	1	1	160	80	72	84	CO
Zhang, Huabin, et al. "Efficient visible‐light‐driven carbon dioxide reduction by a single‐atom implanted metal–organic framework." Angewandte Chemie 128.46 (2016): 14522-14526.	306	83	MOF-525-Co	FUNC	Liquid	Zr	none	none	metal		1	20	VIS	330	6	1	160	100	48	235.433	CO
Zhang, Huabin, et al. "Efficient visible‐light‐driven carbon dioxide reduction by a single‐atom implanted metal–organic framework." Angewandte Chemie 128.46 (2016): 14522-14526.	307	83	MOF-525-Co	FUNC	Liquid	Zr	none	none	metal		1	20	VIS	330	5	1	160	100	48	248.3	CO
Zhang, Huabin, et al. "Efficient visible‐light‐driven carbon dioxide reduction by a single‐atom implanted metal–organic framework." Angewandte Chemie 128.46 (2016): 14522-14526.	308	83	MOF-525-Co	FUNC	Liquid	Zr	none	none	metal		1	20	VIS	330	4	1	160	100	48	253.75	CO
Zhang, Huabin, et al. "Efficient visible‐light‐driven carbon dioxide reduction by a single‐atom implanted metal–organic framework." Angewandte Chemie 128.46 (2016): 14522-14526.	309	83	MOF-525-Co	FUNC	Liquid	Zr	none	none	metal		1	20	VIS	330	3	1	160	100	48	268.5	CO
Zhang, Huabin, et al. "Efficient visible‐light‐driven carbon dioxide reduction by a single‐atom implanted metal–organic framework." Angewandte Chemie 128.46 (2016): 14522-14526.	310	83	MOF-525-Co	FUNC	Liquid	Zr	none	none	metal		1	20	VIS	330	2	1	160	100	48	283.75	CO
Zhang, Huabin, et al. "Efficient visible‐light‐driven carbon dioxide reduction by a single‐atom implanted metal–organic framework." Angewandte Chemie 128.46 (2016): 14522-14526.	311	83	MOF-525-Co	FUNC	Liquid	Zr	none	none	metal		1	20	VIS	330	1	1	160	100	48	357.5	CO
Zhang, Huabin, et al. "Efficient visible‐light‐driven carbon dioxide reduction by a single‐atom implanted metal–organic framework." Angewandte Chemie 128.46 (2016): 14522-14526.	312	84	MOF-525-Zn	FUNC	Liquid	Zr	none	none	metal		1	20	VIS	330	6	1	160	100	48	124.033	CO
Zhang, Huabin, et al. "Efficient visible‐light‐driven carbon dioxide reduction by a single‐atom implanted metal–organic framework." Angewandte Chemie 128.46 (2016): 14522-14526.	313	84	MOF-525-Zn	FUNC	Liquid	Zr	none	none	metal		1	20	VIS	330	5	1	160	100	48	114.8	CO
Zhang, Huabin, et al. "Efficient visible‐light‐driven carbon dioxide reduction by a single‐atom implanted metal–organic framework." Angewandte Chemie 128.46 (2016): 14522-14526.	314	84	MOF-525-Zn	FUNC	Liquid	Zr	none	none	metal		1	20	VIS	330	4	1	160	100	48	128.75	CO
Zhang, Huabin, et al. "Efficient visible‐light‐driven carbon dioxide reduction by a single‐atom implanted metal–organic framework." Angewandte Chemie 128.46 (2016): 14522-14526.	315	84	MOF-525-Zn	FUNC	Liquid	Zr	none	none	metal		1	20	VIS	330	3	1	160	100	48	117	CO
Zhang, Huabin, et al. "Efficient visible‐light‐driven carbon dioxide reduction by a single‐atom implanted metal–organic framework." Angewandte Chemie 128.46 (2016): 14522-14526.	316	84	MOF-525-Zn	FUNC	Liquid	Zr	none	none	metal		1	20	VIS	330	2	1	160	100	48	132.25	CO
Zhang, Huabin, et al. "Efficient visible‐light‐driven carbon dioxide reduction by a single‐atom implanted metal–organic framework." Angewandte Chemie 128.46 (2016): 14522-14526.	317	84	MOF-525-Zn	FUNC	Liquid	Zr	none	none	metal		1	20	VIS	330	1	1	160	100	48	181.5	CO
Xu, Hai-Qun, et al. "Visible-light photoreduction of CO2 in a metal–organic framework: boosting electron–hole separation via electron trap states." Journal of the American Chemical Society 137.42 (2015): 13440-13443.	318	85	PCN-222	PURE	Liquid	Zr	none	none	none	1.77	0.833333	9.09091	VIS		10	1	25	125	72	60	HCOOH
Xu, Hai-Qun, et al. "Visible-light photoreduction of CO2 in a metal–organic framework: boosting electron–hole separation via electron trap states." Journal of the American Chemical Society 137.42 (2015): 13440-13443.	319	85	PCN-222	PURE	Liquid	Zr	none	none	none	1.77	0.833333	9.09091	VIS		8	1	25	125	72	66.1125	HCOOH
Xu, Hai-Qun, et al. "Visible-light photoreduction of CO2 in a metal–organic framework: boosting electron–hole separation via electron trap states." Journal of the American Chemical Society 137.42 (2015): 13440-13443.	320	85	PCN-222	PURE	Liquid	Zr	none	none	none	1.77	0.833333	9.09091	VIS		6	1	25	125	72	76.5333	HCOOH
Xu, Hai-Qun, et al. "Visible-light photoreduction of CO2 in a metal–organic framework: boosting electron–hole separation via electron trap states." Journal of the American Chemical Society 137.42 (2015): 13440-13443.	321	85	PCN-222	PURE	Liquid	Zr	none	none	none	1.77	0.833333	9.09091	VIS		4	1	25	125	72	95.25	HCOOH
Xu, Hai-Qun, et al. "Visible-light photoreduction of CO2 in a metal–organic framework: boosting electron–hole separation via electron trap states." Journal of the American Chemical Society 137.42 (2015): 13440-13443.	322	85	PCN-222	PURE	Liquid	Zr	none	none	none	1.77	0.833333	9.09091	VIS		2	1	25	125	72	134.36	HCOOH
Li, Ning, et al. "Adenine components in biomimetic metal–organic frameworks for efficient CO2 photoconversion." Angewandte Chemie 131.16 (2019): 5280-5285.	323	86	AD-MOF-1	FUNC	Liquid	Co	none	none	adenine	1.76	0.166667	0	VIS	100	4	1	20	150	24	179	HCOOH
Li, Ning, et al. "Adenine components in biomimetic metal–organic frameworks for efficient CO2 photoconversion." Angewandte Chemie 131.16 (2019): 5280-5285.	324	86	AD-MOF-1	FUNC	Liquid	Co	none	none	adenine	1.76	0.166667	0	VIS	100	3	1	20	150	24	354.467	HCOOH
Li, Ning, et al. "Adenine components in biomimetic metal–organic frameworks for efficient CO2 photoconversion." Angewandte Chemie 131.16 (2019): 5280-5285.	325	86	AD-MOF-1	FUNC	Liquid	Co	none	none	adenine	1.76	0.166667	0	VIS	100	2	1	20	150	24	386.5	HCOOH
Li, Ning, et al. "Adenine components in biomimetic metal–organic frameworks for efficient CO2 photoconversion." Angewandte Chemie 131.16 (2019): 5280-5285.	326	86	AD-MOF-1	FUNC	Liquid	Co	none	none	adenine	1.76	0.166667	0	VIS	100	1	1	20	150	24	320	HCOOH
Li, Ning, et al. "Adenine components in biomimetic metal–organic frameworks for efficient CO2 photoconversion." Angewandte Chemie 131.16 (2019): 5280-5285.	327	87	AD-MOF-2	FUNC	Liquid	Co	none	none	adenine	1.52	0.166667	0	VIS	100	4	1	20	120	240	443	HCOOH
Li, Ning, et al. "Adenine components in biomimetic metal–organic frameworks for efficient CO2 photoconversion." Angewandte Chemie 131.16 (2019): 5280-5285.	328	87	AD-MOF-2	FUNC	Liquid	Co	none	none	adenine	1.52	0.166667	0	VIS	100	3	1	20	120	240	1143.6	HCOOH
Li, Ning, et al. "Adenine components in biomimetic metal–organic frameworks for efficient CO2 photoconversion." Angewandte Chemie 131.16 (2019): 5280-5285.	329	87	AD-MOF-2	FUNC	Liquid	Co	none	none	adenine	1.52	0.166667	0	VIS	100	2	1	20	120	240	1284.6	HCOOH
Li, Ning, et al. "Adenine components in biomimetic metal–organic frameworks for efficient CO2 photoconversion." Angewandte Chemie 131.16 (2019): 5280-5285.	330	87	AD-MOF-2	FUNC	Liquid	Co	none	none	adenine	1.52	0.166667	0	VIS	100	1	1	20	120	240	1246.2	HCOOH
Wang, Yu, et al. "Hydroxide ligands cooperate with catalytic centers in metal–organic frameworks for efficient photocatalytic CO2 reduction." Journal of the American Chemical Society 140.1 (2018): 38-41.	331	88	MAF-X27-OH	FUNC	Liquid	Co	none	none	OH		20		VIS	16	10	0.1	25	200	12	18.028	CO
Wang, Yu, et al. "Hydroxide ligands cooperate with catalytic centers in metal–organic frameworks for efficient photocatalytic CO2 reduction." Journal of the American Chemical Society 140.1 (2018): 38-41.	332	88	MAF-X27-OH	FUNC	Liquid	Co	none	none	OH		20		VIS	16	8	0.1	25	200	12	20.0938	CO
Wang, Yu, et al. "Hydroxide ligands cooperate with catalytic centers in metal–organic frameworks for efficient photocatalytic CO2 reduction." Journal of the American Chemical Society 140.1 (2018): 38-41.	333	88	MAF-X27-OH	FUNC	Liquid	Co	none	none	OH		20		VIS	16	6	0.1	25	200	12	21.6917	CO
Wang, Yu, et al. "Hydroxide ligands cooperate with catalytic centers in metal–organic frameworks for efficient photocatalytic CO2 reduction." Journal of the American Chemical Society 140.1 (2018): 38-41.	334	88	MAF-X27-OH	FUNC	Liquid	Co	none	none	OH		20		VIS	16	4	0.1	25	200	12	23.6025	CO
Wang, Yu, et al. "Hydroxide ligands cooperate with catalytic centers in metal–organic frameworks for efficient photocatalytic CO2 reduction." Journal of the American Chemical Society 140.1 (2018): 38-41.	335	88	MAF-X27-OH	FUNC	Liquid	Co	none	none	OH		20		VIS	16	2	0.1	25	200	12	25.89	CO
Wang, Yu, et al. "Hydroxide ligands cooperate with catalytic centers in metal–organic frameworks for efficient photocatalytic CO2 reduction." Journal of the American Chemical Society 140.1 (2018): 38-41.	336	88	MAF-X27-OH	FUNC	Liquid	Co	none	none	OH		20		VIS	16	10	1	25	200	12	21.6	CO
Wang, Yu, et al. "Hydroxide ligands cooperate with catalytic centers in metal–organic frameworks for efficient photocatalytic CO2 reduction." Journal of the American Chemical Society 140.1 (2018): 38-41.	337	88	MAF-X27-OH	FUNC	Liquid	Co	none	none	OH		20		VIS	16	8	1	25	200	12	24.875	CO
Wang, Yu, et al. "Hydroxide ligands cooperate with catalytic centers in metal–organic frameworks for efficient photocatalytic CO2 reduction." Journal of the American Chemical Society 140.1 (2018): 38-41.	338	88	MAF-X27-OH	FUNC	Liquid	Co	none	none	OH		20		VIS	16	6	1	25	200	12	27.215	CO
Wang, Yu, et al. "Hydroxide ligands cooperate with catalytic centers in metal–organic frameworks for efficient photocatalytic CO2 reduction." Journal of the American Chemical Society 140.1 (2018): 38-41.	339	88	MAF-X27-OH	FUNC	Liquid	Co	none	none	OH		20		VIS	16	4	1	25	200	12	29.5475	CO
Wang, Yu, et al. "Hydroxide ligands cooperate with catalytic centers in metal–organic frameworks for efficient photocatalytic CO2 reduction." Journal of the American Chemical Society 140.1 (2018): 38-41.	340	88	MAF-X27-OH	FUNC	Liquid	Co	none	none	OH		20		VIS	16	2	1	25	200	12	32.3	CO
Wang, Yu, et al. "Hydroxide ligands cooperate with catalytic centers in metal–organic frameworks for efficient photocatalytic CO2 reduction." Journal of the American Chemical Society 140.1 (2018): 38-41.	341	89	MAF-X27l-OH	FUNC	Liquid	Co	none	none	OH		20		VIS	16	10	0.1	25	100	12	37.024	CO
Wang, Yu, et al. "Hydroxide ligands cooperate with catalytic centers in metal–organic frameworks for efficient photocatalytic CO2 reduction." Journal of the American Chemical Society 140.1 (2018): 38-41.	342	89	MAF-X27l-OH	FUNC	Liquid	Co	none	none	OH		20		VIS	16	8	0.1	25	100	12	41.6937	CO
Wang, Yu, et al. "Hydroxide ligands cooperate with catalytic centers in metal–organic frameworks for efficient photocatalytic CO2 reduction." Journal of the American Chemical Society 140.1 (2018): 38-41.	343	89	MAF-X27l-OH	FUNC	Liquid	Co	none	none	OH		20		VIS	16	6	0.1	25	100	12	45.12	CO
Wang, Yu, et al. "Hydroxide ligands cooperate with catalytic centers in metal–organic frameworks for efficient photocatalytic CO2 reduction." Journal of the American Chemical Society 140.1 (2018): 38-41.	344	89	MAF-X27l-OH	FUNC	Liquid	Co	none	none	OH		20		VIS	16	4	0.1	25	100	12	48.4725	CO
Wang, Yu, et al. "Hydroxide ligands cooperate with catalytic centers in metal–organic frameworks for efficient photocatalytic CO2 reduction." Journal of the American Chemical Society 140.1 (2018): 38-41.	345	89	MAF-X27l-OH	FUNC	Liquid	Co	none	none	OH		20		VIS	16	2	0.1	25	100	12	48.965	CO
Wang, Yu, et al. "Hydroxide ligands cooperate with catalytic centers in metal–organic frameworks for efficient photocatalytic CO2 reduction." Journal of the American Chemical Society 140.1 (2018): 38-41.	346	89	MAF-X27l-OH	FUNC	Liquid	Co	none	none	OH		20		VIS	16	10	1	25	100	12	44.431	CO
Wang, Yu, et al. "Hydroxide ligands cooperate with catalytic centers in metal–organic frameworks for efficient photocatalytic CO2 reduction." Journal of the American Chemical Society 140.1 (2018): 38-41.	347	89	MAF-X27l-OH	FUNC	Liquid	Co	none	none	OH		20		VIS	16	8	1	25	100	12	50.0975	CO
Wang, Yu, et al. "Hydroxide ligands cooperate with catalytic centers in metal–organic frameworks for efficient photocatalytic CO2 reduction." Journal of the American Chemical Society 140.1 (2018): 38-41.	348	89	MAF-X27l-OH	FUNC	Liquid	Co	none	none	OH		20		VIS	16	6	1	25	100	12	54.6083	CO
Wang, Yu, et al. "Hydroxide ligands cooperate with catalytic centers in metal–organic frameworks for efficient photocatalytic CO2 reduction." Journal of the American Chemical Society 140.1 (2018): 38-41.	349	89	MAF-X27l-OH	FUNC	Liquid	Co	none	none	OH		20		VIS	16	4	1	25	100	12	58.825	CO
Wang, Yu, et al. "Hydroxide ligands cooperate with catalytic centers in metal–organic frameworks for efficient photocatalytic CO2 reduction." Journal of the American Chemical Society 140.1 (2018): 38-41.	350	89	MAF-X27l-OH	FUNC	Liquid	Co	none	none	OH		20		VIS	16	2	1	25	100	12	61.08	CO
Wang, Yu, et al. "Hydroxide ligands cooperate with catalytic centers in metal–organic frameworks for efficient photocatalytic CO2 reduction." Journal of the American Chemical Society 140.1 (2018): 38-41.	351	90	MAF-X27-Cl	FUNC	Liquid	Co	none	none	nonmetal		20		VIS	16	10	0.1	25	70	72	2.423	H2
Wang, Yu, et al. "Hydroxide ligands cooperate with catalytic centers in metal–organic frameworks for efficient photocatalytic CO2 reduction." Journal of the American Chemical Society 140.1 (2018): 38-41.	352	90	MAF-X27-Cl	FUNC	Liquid	Co	none	none	nonmetal		20		VIS	16	8	0.1	25	70	72	2.61	H2
Wang, Yu, et al. "Hydroxide ligands cooperate with catalytic centers in metal–organic frameworks for efficient photocatalytic CO2 reduction." Journal of the American Chemical Society 140.1 (2018): 38-41.	353	90	MAF-X27-Cl	FUNC	Liquid	Co	none	none	nonmetal		20		VIS	16	6	0.1	25	70	72	2.79167	H2
Wang, Yu, et al. "Hydroxide ligands cooperate with catalytic centers in metal–organic frameworks for efficient photocatalytic CO2 reduction." Journal of the American Chemical Society 140.1 (2018): 38-41.	354	90	MAF-X27-Cl	FUNC	Liquid	Co	none	none	nonmetal		20		VIS	16	4	0.1	25	70	72	3.15	H2
Wang, Yu, et al. "Hydroxide ligands cooperate with catalytic centers in metal–organic frameworks for efficient photocatalytic CO2 reduction." Journal of the American Chemical Society 140.1 (2018): 38-41.	355	90	MAF-X27-Cl	FUNC	Liquid	Co	none	none	nonmetal		20		VIS	16	2	0.1	25	70	72	3.24	H2
Wang, Yu, et al. "Hydroxide ligands cooperate with catalytic centers in metal–organic frameworks for efficient photocatalytic CO2 reduction." Journal of the American Chemical Society 140.1 (2018): 38-41.	356	90	MAF-X27-Cl	FUNC	Liquid	Co	none	none	nonmetal		20		VIS	16	10	1	25	70	72	7.05	CO
Wang, Yu, et al. "Hydroxide ligands cooperate with catalytic centers in metal–organic frameworks for efficient photocatalytic CO2 reduction." Journal of the American Chemical Society 140.1 (2018): 38-41.	357	90	MAF-X27-Cl	FUNC	Liquid	Co	none	none	nonmetal		20		VIS	16	8	1	25	70	72	7.8025	CO
Wang, Yu, et al. "Hydroxide ligands cooperate with catalytic centers in metal–organic frameworks for efficient photocatalytic CO2 reduction." Journal of the American Chemical Society 140.1 (2018): 38-41.	358	90	MAF-X27-Cl	FUNC	Liquid	Co	none	none	nonmetal		20		VIS	16	6	1	25	70	72	8.51167	CO
Wang, Yu, et al. "Hydroxide ligands cooperate with catalytic centers in metal–organic frameworks for efficient photocatalytic CO2 reduction." Journal of the American Chemical Society 140.1 (2018): 38-41.	359	90	MAF-X27-Cl	FUNC	Liquid	Co	none	none	nonmetal		20		VIS	16	4	1	25	70	72	9.49	CO
Wang, Yu, et al. "Hydroxide ligands cooperate with catalytic centers in metal–organic frameworks for efficient photocatalytic CO2 reduction." Journal of the American Chemical Society 140.1 (2018): 38-41.	360	90	MAF-X27-Cl	FUNC	Liquid	Co	none	none	nonmetal		20		VIS	16	2	1	25	70	72	10.345	CO
Wang, Yu, et al. "Hydroxide ligands cooperate with catalytic centers in metal–organic frameworks for efficient photocatalytic CO2 reduction." Journal of the American Chemical Society 140.1 (2018): 38-41.	361	91	MAF-X27l-Cl	FUNC	Liquid	Co	none	none	nonmetal		20		VIS	16	10	0.1	25	74	96	4.154	H2
Wang, Yu, et al. "Hydroxide ligands cooperate with catalytic centers in metal–organic frameworks for efficient photocatalytic CO2 reduction." Journal of the American Chemical Society 140.1 (2018): 38-41.	362	91	MAF-X27l-Cl	FUNC	Liquid	Co	none	none	nonmetal		20		VIS	16	8	0.1	25	74	96	4.34	H2
Wang, Yu, et al. "Hydroxide ligands cooperate with catalytic centers in metal–organic frameworks for efficient photocatalytic CO2 reduction." Journal of the American Chemical Society 140.1 (2018): 38-41.	363	91	MAF-X27l-Cl	FUNC	Liquid	Co	none	none	nonmetal		20		VIS	16	6	0.1	25	74	96	4.905	H2
Wang, Yu, et al. "Hydroxide ligands cooperate with catalytic centers in metal–organic frameworks for efficient photocatalytic CO2 reduction." Journal of the American Chemical Society 140.1 (2018): 38-41.	364	91	MAF-X27l-Cl	FUNC	Liquid	Co	none	none	nonmetal		20		VIS	16	4	0.1	25	74	96	5.015	H2
Wang, Yu, et al. "Hydroxide ligands cooperate with catalytic centers in metal–organic frameworks for efficient photocatalytic CO2 reduction." Journal of the American Chemical Society 140.1 (2018): 38-41.	365	91	MAF-X27l-Cl	FUNC	Liquid	Co	none	none	nonmetal		20		VIS	16	2	0.1	25	74	96	5.04	H2
Wang, Yu, et al. "Hydroxide ligands cooperate with catalytic centers in metal–organic frameworks for efficient photocatalytic CO2 reduction." Journal of the American Chemical Society 140.1 (2018): 38-41.	366	91	MAF-X27l-Cl	FUNC	Liquid	Co	none	none	nonmetal		20		VIS	16	10	1	25	74	96	12.6	CO
Wang, Yu, et al. "Hydroxide ligands cooperate with catalytic centers in metal–organic frameworks for efficient photocatalytic CO2 reduction." Journal of the American Chemical Society 140.1 (2018): 38-41.	367	91	MAF-X27l-Cl	FUNC	Liquid	Co	none	none	nonmetal		20		VIS	16	8	1	25	74	96	13.47	CO
Wang, Yu, et al. "Hydroxide ligands cooperate with catalytic centers in metal–organic frameworks for efficient photocatalytic CO2 reduction." Journal of the American Chemical Society 140.1 (2018): 38-41.	368	91	MAF-X27l-Cl	FUNC	Liquid	Co	none	none	nonmetal		20		VIS	16	6	1	25	74	96	14.83	CO
Wang, Yu, et al. "Hydroxide ligands cooperate with catalytic centers in metal–organic frameworks for efficient photocatalytic CO2 reduction." Journal of the American Chemical Society 140.1 (2018): 38-41.	369	91	MAF-X27l-Cl	FUNC	Liquid	Co	none	none	nonmetal		20		VIS	16	4	1	25	74	96	16.4875	CO
Wang, Yu, et al. "Hydroxide ligands cooperate with catalytic centers in metal–organic frameworks for efficient photocatalytic CO2 reduction." Journal of the American Chemical Society 140.1 (2018): 38-41.	370	91	MAF-X27l-Cl	FUNC	Liquid	Co	none	none	nonmetal		20		VIS	16	2	1	25	74	96	18.12	CO
Wang, Yu, et al. "Hydroxide ligands cooperate with catalytic centers in metal–organic frameworks for efficient photocatalytic CO2 reduction." Journal of the American Chemical Society 140.1 (2018): 38-41.	371	92	MOF74-C0	FUNC	Liquid	Co	none	none	none		20		VIS	16	10	0.1	25	70	72	5.047	H2
Wang, Yu, et al. "Hydroxide ligands cooperate with catalytic centers in metal–organic frameworks for efficient photocatalytic CO2 reduction." Journal of the American Chemical Society 140.1 (2018): 38-41.	372	92	MOF74-C0	FUNC	Liquid	Co	none	none	none		20		VIS	16	8	0.1	25	70	72	5.61625	H2
Wang, Yu, et al. "Hydroxide ligands cooperate with catalytic centers in metal–organic frameworks for efficient photocatalytic CO2 reduction." Journal of the American Chemical Society 140.1 (2018): 38-41.	373	92	MOF74-C0	FUNC	Liquid	Co	none	none	none		20		VIS	16	6	0.1	25	70	72	6.23167	H2
Wang, Yu, et al. "Hydroxide ligands cooperate with catalytic centers in metal–organic frameworks for efficient photocatalytic CO2 reduction." Journal of the American Chemical Society 140.1 (2018): 38-41.	374	92	MOF74-C0	FUNC	Liquid	Co	none	none	none		20		VIS	16	4	0.1	25	70	72	6.2275	H2
Wang, Yu, et al. "Hydroxide ligands cooperate with catalytic centers in metal–organic frameworks for efficient photocatalytic CO2 reduction." Journal of the American Chemical Society 140.1 (2018): 38-41.	375	92	MOF74-C0	FUNC	Liquid	Co	none	none	none		20		VIS	16	2	0.1	25	70	72	6.53	H2
Wang, Yu, et al. "Hydroxide ligands cooperate with catalytic centers in metal–organic frameworks for efficient photocatalytic CO2 reduction." Journal of the American Chemical Society 140.1 (2018): 38-41.	376	92	MOF74-C0	FUNC	Liquid	Co	none	none	none		20		VIS	16	10	1	25	70	72	16.1	CO
Wang, Yu, et al. "Hydroxide ligands cooperate with catalytic centers in metal–organic frameworks for efficient photocatalytic CO2 reduction." Journal of the American Chemical Society 140.1 (2018): 38-41.	377	92	MOF74-C0	FUNC	Liquid	Co	none	none	none		20		VIS	16	8	1	25	70	72	18.0188	CO
Wang, Yu, et al. "Hydroxide ligands cooperate with catalytic centers in metal–organic frameworks for efficient photocatalytic CO2 reduction." Journal of the American Chemical Society 140.1 (2018): 38-41.	378	92	MOF74-C0	FUNC	Liquid	Co	none	none	none		20		VIS	16	6	1	25	70	72	20.0717	CO
Wang, Yu, et al. "Hydroxide ligands cooperate with catalytic centers in metal–organic frameworks for efficient photocatalytic CO2 reduction." Journal of the American Chemical Society 140.1 (2018): 38-41.	379	92	MOF74-C0	FUNC	Liquid	Co	none	none	none		20		VIS	16	4	1	25	70	72	20.7275	CO
Wang, Yu, et al. "Hydroxide ligands cooperate with catalytic centers in metal–organic frameworks for efficient photocatalytic CO2 reduction." Journal of the American Chemical Society 140.1 (2018): 38-41.	380	92	MOF74-C0	FUNC	Liquid	Co	none	none	none		20		VIS	16	2	1	25	70	72	22.47	CO
Chambers, Matthew B., et al. "Photocatalytic carbon dioxide reduction with rhodium‐based catalysts in solution and heterogenized within metal–organic frameworks." ChemSusChem 8.4 (2015): 603-608.	381	93	Cp*Rh@UiO-67	FUNC	Liquid	Zr	present	none	metal	2.4	1.4	16.6667	VIS	1		1	20	120	24	749	HCOOH
Wang, Sibo, and Xinchen Wang. "Photocatalytic CO2 reduction by CdS promoted with a zeolitic imidazolate framework." Applied Catalysis B: Environmental 162 (2015): 494-500.	382	94	Co-ZIF-9	COMP	Liquid	Co	none	none	none		5	16.6667	VIS	80	1	1	10			715.767	CO
Wang, Sibo, and Xinchen Wang. "Photocatalytic CO2 reduction by CdS promoted with a zeolitic imidazolate framework." Applied Catalysis B: Environmental 162 (2015): 494-500.	383	94	Co-ZIF-9	COMP	Liquid	Co	none	none	none		5	16.6667	VIS	80	1	1	20			1073.83	CO
Wang, Sibo, and Xinchen Wang. "Photocatalytic CO2 reduction by CdS promoted with a zeolitic imidazolate framework." Applied Catalysis B: Environmental 162 (2015): 494-500.	384	94	Co-ZIF-9	COMP	Liquid	Co	none	none	none		5	16.6667	VIS	80	1	1	30			2035.07	CO
Wang, Sibo, and Xinchen Wang. "Photocatalytic CO2 reduction by CdS promoted with a zeolitic imidazolate framework." Applied Catalysis B: Environmental 162 (2015): 494-500.	385	94	Co-ZIF-9	COMP	Liquid	Co	none	none	none		5	16.6667	VIS	80	1	1	40			2463.17	CO
Wang, Sibo, and Xinchen Wang. "Photocatalytic CO2 reduction by CdS promoted with a zeolitic imidazolate framework." Applied Catalysis B: Environmental 162 (2015): 494-500.	386	94	Co-ZIF-9	COMP	Liquid	Co	none	none	none		5	16.6667	VIS	80	1	1	50			2224.53	CO
Wang, Sibo, and Xinchen Wang. "Photocatalytic CO2 reduction by CdS promoted with a zeolitic imidazolate framework." Applied Catalysis B: Environmental 162 (2015): 494-500.	387	94	Co-ZIF-9	COMP	Liquid	Co	none	none	none		5	16.6667	VIS	80	1	1	60			2259.67	CO
Wang, Sibo, et al. "Cobalt imidazolate metal–organic frameworks photosplit CO2 under mild reaction conditions." Angewandte Chemie International Edition 53.4 (2014): 1034-1038.	388	95	NH2-UiO-66	FUNC	Liquid	Zr	none	present	none		333.333	16.6667	VIS	80	0.5	1	20			3.4	H2
Wang, Sibo, et al. "Cobalt imidazolate metal–organic frameworks photosplit CO2 under mild reaction conditions." Angewandte Chemie International Edition 53.4 (2014): 1034-1038.	389	96	Co-ZIF-9	COMP	Liquid	Co	none	none	none		333.333	16.6667	VIS	80	0.5	1	20	130	48	71.7	CO
Wang, Sibo, et al. "Cobalt imidazolate metal–organic frameworks photosplit CO2 under mild reaction conditions." Angewandte Chemie International Edition 53.4 (2014): 1034-1038.	390	96	Co-ZIF-9	COMP	Liquid	Co	none	none	none		333.333	16.6667	VIS	80	0.5	1	80	130	48	51.111	CO
Wang, Sibo, et al. "Cobalt imidazolate metal–organic frameworks photosplit CO2 under mild reaction conditions." Angewandte Chemie International Edition 53.4 (2014): 1034-1038.	391	96	Co-ZIF-9	COMP	Liquid	Co	none	none	none		333.333	16.6667	VIS	80	0.5	1	100	130	48	67.09	CO
Wang, Sibo, et al. "Cobalt imidazolate metal–organic frameworks photosplit CO2 under mild reaction conditions." Angewandte Chemie International Edition 53.4 (2014): 1034-1038.	392	96	Co-ZIF-9	COMP	Liquid	Co	none	none	none		333.333	16.6667	VIS	80	0.5	1	110	130	48	71.376	CO
Wang, Sibo, et al. "Cobalt imidazolate metal–organic frameworks photosplit CO2 under mild reaction conditions." Angewandte Chemie International Edition 53.4 (2014): 1034-1038.	393	96	Co-ZIF-9	COMP	Liquid	Co	none	none	none		333.333	16.6667	VIS	80	0.5	1	120	130	48	59.484	CO
Wang, Sibo, et al. "Cobalt imidazolate metal–organic frameworks photosplit CO2 under mild reaction conditions." Angewandte Chemie International Edition 53.4 (2014): 1034-1038.	394	96	Co-ZIF-9	COMP	Liquid	Co	none	none	none		333.333	16.6667	VIS	80	0.5	1	140	130	48	54.848	CO
Wang, Sibo, et al. "Cobalt imidazolate metal–organic frameworks photosplit CO2 under mild reaction conditions." Angewandte Chemie International Edition 53.4 (2014): 1034-1038.	395	96	Co-ZIF-9	COMP	Liquid	Co	none	none	none		333.333	16.6667	VIS	80	0.5	1	160	130	48	71.664	CO
Wang, Sibo, et al. "Cobalt imidazolate metal–organic frameworks photosplit CO2 under mild reaction conditions." Angewandte Chemie International Edition 53.4 (2014): 1034-1038.	396	96	Co-ZIF-9	COMP	Liquid	Co	none	none	none		333.333	16.6667	VIS	80	1	1	160	130	48	41.888	CO
Wang, Sibo, et al. "Cobalt imidazolate metal–organic frameworks photosplit CO2 under mild reaction conditions." Angewandte Chemie International Edition 53.4 (2014): 1034-1038.	397	97	Co-MOF-74	COMP	Liquid	Co	none	none	none		333.333	16.6667	VIS	80	0.5	1	20			84.7	H2
Wang, Sibo, et al. "Cobalt imidazolate metal–organic frameworks photosplit CO2 under mild reaction conditions." Angewandte Chemie International Edition 53.4 (2014): 1034-1038.	398	98	Mn-MOF-74	COMP	Liquid	other	none	none	none		333.333	16.6667	VIS	80	0.5	1	20			4.4	H2
Wang, Sibo, et al. "Cobalt imidazolate metal–organic frameworks photosplit CO2 under mild reaction conditions." Angewandte Chemie International Edition 53.4 (2014): 1034-1038.	399	99	Zn-ZIF-8	COMP	Liquid	Zn	none	none	none		333.333	16.6667	VIS	80	0.5	1	20			4.5	H2
Lee, Yeob, et al. "Photocatalytic CO 2 reduction by a mixed metal (Zr/Ti), mixed ligand metal–organic framework under visible light irradiation." Chemical Communications 51.26 (2015): 5735-5738.	400	100	(NH2)2-UiO-66 (Zr/Ti)	EXCH	Liquid	Zr	none	present	Ti	2.67	1	20	VIS		6	1	230	85	24	1052	HCOOH
Lee, Yeob, et al. "Photocatalytic CO 2 reduction by a mixed metal (Zr/Ti), mixed ligand metal–organic framework under visible light irradiation." Chemical Communications 51.26 (2015): 5735-5738.	401	101	NH2-UiO-66 (Zr/Ti)	EXCH	Liquid	Zr	none	present	Ti	2.67	1	20	VIS		6	1	230	85	24	741	HCOOH
Sun, Dengrong, et al. "Introduction of a mediator for enhancing photocatalytic performance via post-synthetic metal exchange in metal–organic frameworks (MOFs)." Chemical communications 51.11 (2015): 2056-2059.	402	102	NH2-UiO-66(Zr)	EXCH	Liquid	Zr	none	present	none	2.67	0.833333	16.6667	VIS		10	1	30	120	24	3.4	HCOOH
Sun, Dengrong, et al. "Introduction of a mediator for enhancing photocatalytic performance via post-synthetic metal exchange in metal–organic frameworks (MOFs)." Chemical communications 51.11 (2015): 2056-2059.	403	103	NH2-UiO-66(Zr/Ti)	EXCH	Liquid	Zr	none	present	Ti	2.67	0.833333	16.6667	VIS		10	1	30	40	24	5.8	HCOOH
Han, Bin, et al. "Nickel metal–organic framework monolayers for photoreduction of diluted CO2: metal‐node‐dependent activity and selectivity." Angewandte Chemie International Edition 57.51 (2018): 16811-16815.	404	104	ZIF-67	EXCH	Liquid	Co	none	none	none		0.166667	16.6667	VIS	60	2	1	20	70	12	9	H2
Han, Bin, et al. "Nickel metal–organic framework monolayers for photoreduction of diluted CO2: metal‐node‐dependent activity and selectivity." Angewandte Chemie International Edition 57.51 (2018): 16811-16815.	405	105	Ni MOLs	EXCH	Liquid	none	none	none	none		0.166667	16.6667	VIS	60	2	1	20			12.78	CO
Han, Bin, et al. "Nickel metal–organic framework monolayers for photoreduction of diluted CO2: metal‐node‐dependent activity and selectivity." Angewandte Chemie International Edition 57.51 (2018): 16811-16815.	406	106	Bulk MOFs	EXCH	Liquid	none	none	none	none		0.166667	16.6667	VIS	60	2	1	20	140	24	7.52	CO
Han, Bin, et al. "Nickel metal–organic framework monolayers for photoreduction of diluted CO2: metal‐node‐dependent activity and selectivity." Angewandte Chemie International Edition 57.51 (2018): 16811-16815.	407	107	Co MOLs	EXCH	Liquid	none	none	none	none		0.166667	16.6667	VIS	60	2	1	20			6.95	CO
Han, Bin, et al. "Nickel metal–organic framework monolayers for photoreduction of diluted CO2: metal‐node‐dependent activity and selectivity." Angewandte Chemie International Edition 57.51 (2018): 16811-16815.	408	108	Ni TDA MOFs	EXCH	Liquid	none	none	none	none		0.166667	16.6667	VIS	60	2	1	20	110	12	7.07	CO
Han, Bin, et al. "Nickel metal–organic framework monolayers for photoreduction of diluted CO2: metal‐node‐dependent activity and selectivity." Angewandte Chemie International Edition 57.51 (2018): 16811-16815.	409	109	Co TDA MOFs	EXCH	Liquid	none	none	none	none		0.166667	16.6667	VIS	60	2	1	20	110	12	6	CO
Wan, Shipeng, et al. "Perovskite-type CsPbBr3 quantum dots/UiO-66 (NH2) nanojunction as efficient visible-light-driven photocatalyst for CO2 reduction." Chemical Engineering Journal 358 (2019): 1287-1295.	410	110	CsPbBr3 (0%)QDs/UiO-66 (NH2)	COMP	Gas	Zr	none	present	none	2.89		0	VIS		12	0.8	5	120	48	1.41667	CO
Wan, Shipeng, et al. "Perovskite-type CsPbBr3 quantum dots/UiO-66 (NH2) nanojunction as efficient visible-light-driven photocatalyst for CO2 reduction." Chemical Engineering Journal 358 (2019): 1287-1295.	411	111	CsPbBr3 (5%)QDs/UiO-66 (NH2)	COMP	Gas	Zr	none	present	CsPbBr3	2.89		0	VIS		12	0.8	5	120	48	5.25	CO
Wan, Shipeng, et al. "Perovskite-type CsPbBr3 quantum dots/UiO-66 (NH2) nanojunction as efficient visible-light-driven photocatalyst for CO2 reduction." Chemical Engineering Journal 358 (2019): 1287-1295.	412	112	CsPbBr3 (10%)QDs/UiO-66 (NH2)	COMP	Gas	Zr	none	present	CsPbBr3	2.89		0	VIS		12	0.8	5	120	48	6.91667	CO
Wan, Shipeng, et al. "Perovskite-type CsPbBr3 quantum dots/UiO-66 (NH2) nanojunction as efficient visible-light-driven photocatalyst for CO2 reduction." Chemical Engineering Journal 358 (2019): 1287-1295.	413	113	CsPbBr3 (15%)QDs/UiO-66 (NH2)	COMP	Gas	Zr	none	present	CsPbBr3	2.89		0	VIS		12	0.8	5	120	48	8.47	CO
Wan, Shipeng, et al. "Perovskite-type CsPbBr3 quantum dots/UiO-66 (NH2) nanojunction as efficient visible-light-driven photocatalyst for CO2 reduction." Chemical Engineering Journal 358 (2019): 1287-1295.	414	113	CsPbBr3 (15%)QDs/UiO-66 (NH2)	COMP	Gas	Zr	none	present	CsPbBr3	2.89		0	VIS		11	0.8	5	120	48	8.55618	CO
Wan, Shipeng, et al. "Perovskite-type CsPbBr3 quantum dots/UiO-66 (NH2) nanojunction as efficient visible-light-driven photocatalyst for CO2 reduction." Chemical Engineering Journal 358 (2019): 1287-1295.	415	113	CsPbBr3 (15%)QDs/UiO-66 (NH2)	COMP	Gas	Zr	none	present	CsPbBr3	2.89		0	VIS		10	0.8	5	120	48	8.353	CO
Wan, Shipeng, et al. "Perovskite-type CsPbBr3 quantum dots/UiO-66 (NH2) nanojunction as efficient visible-light-driven photocatalyst for CO2 reduction." Chemical Engineering Journal 358 (2019): 1287-1295.	416	113	CsPbBr3 (15%)QDs/UiO-66 (NH2)	COMP	Gas	Zr	none	present	CsPbBr3	2.89		0	VIS		9	0.8	5	120	48	8.52944	CO
Wan, Shipeng, et al. "Perovskite-type CsPbBr3 quantum dots/UiO-66 (NH2) nanojunction as efficient visible-light-driven photocatalyst for CO2 reduction." Chemical Engineering Journal 358 (2019): 1287-1295.	417	113	CsPbBr3 (15%)QDs/UiO-66 (NH2)	COMP	Gas	Zr	none	present	CsPbBr3	2.89		0	VIS		8	0.8	5	120	48	8.5295	CO
Wan, Shipeng, et al. "Perovskite-type CsPbBr3 quantum dots/UiO-66 (NH2) nanojunction as efficient visible-light-driven photocatalyst for CO2 reduction." Chemical Engineering Journal 358 (2019): 1287-1295.	418	113	CsPbBr3 (15%)QDs/UiO-66 (NH2)	COMP	Gas	Zr	none	present	CsPbBr3	2.89		0	VIS		7	0.8	5	120	48	7.94114	CO
Wan, Shipeng, et al. "Perovskite-type CsPbBr3 quantum dots/UiO-66 (NH2) nanojunction as efficient visible-light-driven photocatalyst for CO2 reduction." Chemical Engineering Journal 358 (2019): 1287-1295.	419	113	CsPbBr3 (15%)QDs/UiO-66 (NH2)	COMP	Gas	Zr	none	present	CsPbBr3	2.89		0	VIS		6	0.8	5	120	48	7.84317	CO
Wan, Shipeng, et al. "Perovskite-type CsPbBr3 quantum dots/UiO-66 (NH2) nanojunction as efficient visible-light-driven photocatalyst for CO2 reduction." Chemical Engineering Journal 358 (2019): 1287-1295.	420	113	CsPbBr3 (15%)QDs/UiO-66 (NH2)	COMP	Gas	Zr	none	present	CsPbBr3	2.89		0	VIS		5	0.8	5	120	48	8.1764	CO
Wan, Shipeng, et al. "Perovskite-type CsPbBr3 quantum dots/UiO-66 (NH2) nanojunction as efficient visible-light-driven photocatalyst for CO2 reduction." Chemical Engineering Journal 358 (2019): 1287-1295.	421	113	CsPbBr3 (15%)QDs/UiO-66 (NH2)	COMP	Gas	Zr	none	present	CsPbBr3	2.89		0	VIS		4	0.8	5	120	48	9.1175	CO
Wan, Shipeng, et al. "Perovskite-type CsPbBr3 quantum dots/UiO-66 (NH2) nanojunction as efficient visible-light-driven photocatalyst for CO2 reduction." Chemical Engineering Journal 358 (2019): 1287-1295.	422	113	CsPbBr3 (15%)QDs/UiO-66 (NH2)	COMP	Gas	Zr	none	present	CsPbBr3	2.89		0	VIS		3	0.8	5	120	48	7.941	CO
Wan, Shipeng, et al. "Perovskite-type CsPbBr3 quantum dots/UiO-66 (NH2) nanojunction as efficient visible-light-driven photocatalyst for CO2 reduction." Chemical Engineering Journal 358 (2019): 1287-1295.	423	113	CsPbBr3 (15%)QDs/UiO-66 (NH2)	COMP	Gas	Zr	none	present	CsPbBr3	2.89		0	VIS		2	0.8	5	120	48	7.794	CO
Wan, Shipeng, et al. "Perovskite-type CsPbBr3 quantum dots/UiO-66 (NH2) nanojunction as efficient visible-light-driven photocatalyst for CO2 reduction." Chemical Engineering Journal 358 (2019): 1287-1295.	424	113	CsPbBr3 (15%)QDs/UiO-66 (NH2)	COMP	Gas	Zr	none	present	CsPbBr3	2.89		0	VIS		1	0.8	5	120	48	8.529	CO
Wan, Shipeng, et al. "Perovskite-type CsPbBr3 quantum dots/UiO-66 (NH2) nanojunction as efficient visible-light-driven photocatalyst for CO2 reduction." Chemical Engineering Journal 358 (2019): 1287-1295.	425	114	CsPbBr3 (30%)QDs/UiO-66 (NH2)	COMP	Gas	Zr	none	present	CsPbBr3	2.82		0	VIS		12	0.8	5	120	48	6.25833	CO
Chen, Liyong, et al. "N-CND modified NH 2-UiO-66 for photocatalytic CO 2 conversion under visible light by a photo-induced electron transfer process." Chemical Communications 55.33 (2019): 4845-4848.	426	115	pure NH2 -UiO-66	COMP	Liquid	Zr	none	present	none	2.86	0.5		VIS	20	2	1	20	120	24	3.21	HCOOH
Chen, Liyong, et al. "N-CND modified NH 2-UiO-66 for photocatalytic CO 2 conversion under visible light by a photo-induced electron transfer process." Chemical Communications 55.33 (2019): 4845-4848.	427	115	pure NH2 -UiO-66	COMP	Liquid	Zr	none	present	none	2.86	0.5		VIS	20	4	1	20	120	24	3.037	HCOOH
Chen, Liyong, et al. "N-CND modified NH 2-UiO-66 for photocatalytic CO 2 conversion under visible light by a photo-induced electron transfer process." Chemical Communications 55.33 (2019): 4845-4848.	428	115	pure NH2 -UiO-66	COMP	Liquid	Zr	none	present	none	2.86	0.5		VIS	20	6	1	20	120	24	2.963	HCOOH
Chen, Liyong, et al. "N-CND modified NH 2-UiO-66 for photocatalytic CO 2 conversion under visible light by a photo-induced electron transfer process." Chemical Communications 55.33 (2019): 4845-4848.	429	115	pure NH2 -UiO-66	COMP	Liquid	Zr	none	present	none	2.86	0.5		VIS	20	8	1	20	120	24	2.864	HCOOH
Chen, Liyong, et al. "N-CND modified NH 2-UiO-66 for photocatalytic CO 2 conversion under visible light by a photo-induced electron transfer process." Chemical Communications 55.33 (2019): 4845-4848.	430	115	pure NH2 -UiO-66	COMP	Liquid	Zr	none	present	none	2.86	0.5		VIS	20	10	1	20	120	24	2.568	HCOOH
Chen, Liyong, et al. "N-CND modified NH 2-UiO-66 for photocatalytic CO 2 conversion under visible light by a photo-induced electron transfer process." Chemical Communications 55.33 (2019): 4845-4848.	431	115	pure NH2 -UiO-66	COMP	Liquid	Zr	none	present	none	2.86	0.5		VIS	20	12	1	20	120	24	2.617	HCOOH
Chen, Liyong, et al. "N-CND modified NH 2-UiO-66 for photocatalytic CO 2 conversion under visible light by a photo-induced electron transfer process." Chemical Communications 55.33 (2019): 4845-4848.	432	116	N-CNDs/NH2 -UiO-66	COMP	Liquid	Zr	none	present	N-CNDs	2.83	0.5		VIS	20	2	1	20	100	12	10.395	HCOOH
Chen, Liyong, et al. "N-CND modified NH 2-UiO-66 for photocatalytic CO 2 conversion under visible light by a photo-induced electron transfer process." Chemical Communications 55.33 (2019): 4845-4848.	433	116	N-CNDs/NH2 -UiO-66	COMP	Liquid	Zr	none	present	N-CNDs	2.83	0.5		VIS	20	4	1	20	100	12	9.704	HCOOH
Chen, Liyong, et al. "N-CND modified NH 2-UiO-66 for photocatalytic CO 2 conversion under visible light by a photo-induced electron transfer process." Chemical Communications 55.33 (2019): 4845-4848.	434	116	N-CNDs/NH2 -UiO-66	COMP	Liquid	Zr	none	present	N-CNDs	2.83	0.5		VIS	20	6	1	20	100	12	10.173	HCOOH
Chen, Liyong, et al. "N-CND modified NH 2-UiO-66 for photocatalytic CO 2 conversion under visible light by a photo-induced electron transfer process." Chemical Communications 55.33 (2019): 4845-4848.	435	116	N-CNDs/NH2 -UiO-66	COMP	Liquid	Zr	none	present	N-CNDs	2.83	0.5		VIS	20	8	1	20	100	12	10	HCOOH
Chen, Liyong, et al. "N-CND modified NH 2-UiO-66 for photocatalytic CO 2 conversion under visible light by a photo-induced electron transfer process." Chemical Communications 55.33 (2019): 4845-4848.	436	116	N-CNDs/NH2 -UiO-66	COMP	Liquid	Zr	none	present	N-CNDs	2.83	0.5		VIS	20	10	1	20	100	12	10.123	HCOOH
Chen, Liyong, et al. "N-CND modified NH 2-UiO-66 for photocatalytic CO 2 conversion under visible light by a photo-induced electron transfer process." Chemical Communications 55.33 (2019): 4845-4848.	437	116	N-CNDs/NH2 -UiO-66	COMP	Liquid	Zr	none	present	N-CNDs	2.83	0.5		VIS	20	12	1	20	100	12	9.975	HCOOH
Zhao, Hui, et al. "CdS/NH 2-UiO-66 hybrid membrane reactors for the efficient photocatalytic conversion of CO 2." Journal of Materials Chemistry A 6.41 (2018): 20152-20160.	438	117	CdS/NH2-UiO-66	COMP	Liquid	Zr	none	present	CdS	2.64	1.17857	21.4286	VIS	200	6	1	20	50	48	12.0482	CO
Zhao, Hui, et al. "CdS/NH 2-UiO-66 hybrid membrane reactors for the efficient photocatalytic conversion of CO 2." Journal of Materials Chemistry A 6.41 (2018): 20152-20160.	439	117	CdS/NH2-UiO-66	COMP	Liquid	Zr	none	present	CdS	2.64	1.03125	18.75	VIS	200	6	1	20	50	48	13.253	CO
Zhao, Hui, et al. "CdS/NH 2-UiO-66 hybrid membrane reactors for the efficient photocatalytic conversion of CO 2." Journal of Materials Chemistry A 6.41 (2018): 20152-20160.	440	117	CdS/NH2-UiO-66	COMP	Liquid	Zr	none	present	CdS	2.64	1.03125	6.25	VIS	200	6	1	20	50	48	20.322	CO
Zhao, Hui, et al. "CdS/NH 2-UiO-66 hybrid membrane reactors for the efficient photocatalytic conversion of CO 2." Journal of Materials Chemistry A 6.41 (2018): 20152-20160.	441	117	CdS/NH2-UiO-66	COMP	Liquid	Zr	none	present	CdS	2.64	0.970588	11.7647	VIS	200	6	1	20	50	48	44.668	CO
Zhao, Hui, et al. "CdS/NH 2-UiO-66 hybrid membrane reactors for the efficient photocatalytic conversion of CO 2." Journal of Materials Chemistry A 6.41 (2018): 20152-20160.	442	117	CdS/NH2-UiO-66	COMP	Liquid	Zr	none	present	CdS	2.64	0.916667	16.6667	VIS	200	6	1	20	50	48	86.9478	CO
Zhao, Hui, et al. "CdS/NH 2-UiO-66 hybrid membrane reactors for the efficient photocatalytic conversion of CO 2." Journal of Materials Chemistry A 6.41 (2018): 20152-20160.	443	117	CdS/NH2-UiO-66	COMP	Liquid	Zr	none	present	CdS	2.64	0.868421	21.0526	VIS	200	6	1	20	50	48	21.328	CO
Zhao, Hui, et al. "CdS/NH 2-UiO-66 hybrid membrane reactors for the efficient photocatalytic conversion of CO 2." Journal of Materials Chemistry A 6.41 (2018): 20152-20160.	444	117	CdS/NH2-UiO-66	COMP	Liquid	Zr	none	present	CdS	2.64	0.825	15	VIS	200	6	1	20	50	48	23.6948	CO
Zhao, Hui, et al. "CdS/NH 2-UiO-66 hybrid membrane reactors for the efficient photocatalytic conversion of CO 2." Journal of Materials Chemistry A 6.41 (2018): 20152-20160.	445	117	CdS/NH2-UiO-66	COMP	Liquid	Zr	none	present	CdS	2.64	0.916667	16.6667	VIS	200	5	1	20	50	48	75.7082	CO
Zhao, Hui, et al. "CdS/NH 2-UiO-66 hybrid membrane reactors for the efficient photocatalytic conversion of CO 2." Journal of Materials Chemistry A 6.41 (2018): 20152-20160.	446	117	CdS/NH2-UiO-66	COMP	Liquid	Zr	none	present	CdS	2.64	0.916667	16.6667	VIS	200	4	1	20	50	48	47.6395	CO
Zhao, Hui, et al. "CdS/NH 2-UiO-66 hybrid membrane reactors for the efficient photocatalytic conversion of CO 2." Journal of Materials Chemistry A 6.41 (2018): 20152-20160.	447	117	CdS/NH2-UiO-66	COMP	Liquid	Zr	none	present	CdS	2.64	0.916667	16.6667	VIS	200	3	1	20	50	48	42.4893	CO
Zhao, Hui, et al. "CdS/NH 2-UiO-66 hybrid membrane reactors for the efficient photocatalytic conversion of CO 2." Journal of Materials Chemistry A 6.41 (2018): 20152-20160.	448	117	CdS/NH2-UiO-66	COMP	Liquid	Zr	none	present	CdS	2.64	0.916667	16.6667	VIS	200	2	1	20	50	48	39.914	CO
Zhao, Hui, et al. "CdS/NH 2-UiO-66 hybrid membrane reactors for the efficient photocatalytic conversion of CO 2." Journal of Materials Chemistry A 6.41 (2018): 20152-20160.	449	117	CdS/NH2-UiO-66	COMP	Liquid	Zr	none	present	CdS	2.64	0.916667	16.6667	VIS	200	1	1	20	50	48	48.927	CO
Kong, Zi-Cheng, et al. "Core@ shell CsPbBr3@ zeolitic imidazolate framework nanocomposite for efficient photocatalytic CO2 reduction." ACS Energy Letters 3.11 (2018): 2656-2662.	450	118	CsPbBr3	COMP	Gas	none	none	none	none	2.37	0.1125	0	VIS	40	3		20	120	1	1.73367	CH4
Kong, Zi-Cheng, et al. "Core@ shell CsPbBr3@ zeolitic imidazolate framework nanocomposite for efficient photocatalytic CO2 reduction." ACS Energy Letters 3.11 (2018): 2656-2662.	451	118	CsPbBr3	COMP	Gas	none	none	none	none	2.37	0.1125	0	VIS	40	2		20	120	1	1.7835	CH4
Kong, Zi-Cheng, et al. "Core@ shell CsPbBr3@ zeolitic imidazolate framework nanocomposite for efficient photocatalytic CO2 reduction." ACS Energy Letters 3.11 (2018): 2656-2662.	452	118	CsPbBr3	COMP	Gas	none	none	none	none	2.37	0.1125	0	VIS	40	1		20	120	1	1.727	CH4
Kong, Zi-Cheng, et al. "Core@ shell CsPbBr3@ zeolitic imidazolate framework nanocomposite for efficient photocatalytic CO2 reduction." ACS Energy Letters 3.11 (2018): 2656-2662.	453	119	CsPbBr3	COMP	Gas	none	none	none	none	2.37	0.1125	0	VIS	40	3		20	120	1	1.92567	CO
Kong, Zi-Cheng, et al. "Core@ shell CsPbBr3@ zeolitic imidazolate framework nanocomposite for efficient photocatalytic CO2 reduction." ACS Energy Letters 3.11 (2018): 2656-2662.	454	120	CsPbBr3	COMP	Gas	none	none	none	none	2.37	0.1125	0	VIS	40	3		20	120	1	0.159333	CO
Kong, Zi-Cheng, et al. "Core@ shell CsPbBr3@ zeolitic imidazolate framework nanocomposite for efficient photocatalytic CO2 reduction." ACS Energy Letters 3.11 (2018): 2656-2662.	455	121	CsPbBr3	COMP	Gas	none	none	none	none	2.37	0.1125	0	VIS	40	3		20	120	1	0.031	CH4
Kong, Zi-Cheng, et al. "Core@ shell CsPbBr3@ zeolitic imidazolate framework nanocomposite for efficient photocatalytic CO2 reduction." ACS Energy Letters 3.11 (2018): 2656-2662.	456	122	CsPbBr3@ZIF-8(0.5,2)	COMP	Gas	Zn	none	none	CsPbBr3	3.26	0.1125	0	VIS	40	3		20	250	0.5	2.099	CH4
Kong, Zi-Cheng, et al. "Core@ shell CsPbBr3@ zeolitic imidazolate framework nanocomposite for efficient photocatalytic CO2 reduction." ACS Energy Letters 3.11 (2018): 2656-2662.	457	123	CsPbBr3@ZIF-8(0.5,2)	COMP	Gas	Zn	none	none	CsPbBr3	3.26	0.1125	0	VIS	40	3		20	250	0.5	0.188	CH4
Kong, Zi-Cheng, et al. "Core@ shell CsPbBr3@ zeolitic imidazolate framework nanocomposite for efficient photocatalytic CO2 reduction." ACS Energy Letters 3.11 (2018): 2656-2662.	458	124	CsPbBr3@ZIF-8(1,4)	COMP	Gas	Zn	none	none	CsPbBr3	3.26	0.1125	0	VIS	40	3		20	250	0.5	2.31633	CH4
Kong, Zi-Cheng, et al. "Core@ shell CsPbBr3@ zeolitic imidazolate framework nanocomposite for efficient photocatalytic CO2 reduction." ACS Energy Letters 3.11 (2018): 2656-2662.	459	124	CsPbBr3@ZIF-8(1,4)	COMP	Gas	Zn	none	none	CsPbBr3	3.26	0.1125	0	VIS	40	2		20	250	0.5	2.1675	CH4
Kong, Zi-Cheng, et al. "Core@ shell CsPbBr3@ zeolitic imidazolate framework nanocomposite for efficient photocatalytic CO2 reduction." ACS Energy Letters 3.11 (2018): 2656-2662.	460	124	CsPbBr3@ZIF-8(1,4)	COMP	Gas	Zn	none	none	CsPbBr3	3.26	0.1125	0	VIS	40	1		20	250	0.5	2.346	CH4
Kong, Zi-Cheng, et al. "Core@ shell CsPbBr3@ zeolitic imidazolate framework nanocomposite for efficient photocatalytic CO2 reduction." ACS Energy Letters 3.11 (2018): 2656-2662.	461	125	CsPbBr3@ZIF-8(1,4)	COMP	Gas	Zn	none	none	CsPbBr3	3.26	0.1125	0	VIS	40	3		20	250	0.5	0.181333	CH4
Kong, Zi-Cheng, et al. "Core@ shell CsPbBr3@ zeolitic imidazolate framework nanocomposite for efficient photocatalytic CO2 reduction." ACS Energy Letters 3.11 (2018): 2656-2662.	462	126	CsPbBr3@ZIF-8(2,8)	COMP	Gas	Zn	none	none	CsPbBr3	3.26	0.1125	0	VIS	40	3		20	250	0.5	1.04033	CH4
Kong, Zi-Cheng, et al. "Core@ shell CsPbBr3@ zeolitic imidazolate framework nanocomposite for efficient photocatalytic CO2 reduction." ACS Energy Letters 3.11 (2018): 2656-2662.	463	127	CsPbBr3@ZIF-8(2,8)	COMP	Gas	Zn	none	none	CsPbBr3	3.26	0.1125	0	VIS	40	3		20	250	0.5	0.149667	CO
Kong, Zi-Cheng, et al. "Core@ shell CsPbBr3@ zeolitic imidazolate framework nanocomposite for efficient photocatalytic CO2 reduction." ACS Energy Letters 3.11 (2018): 2656-2662.	464	128	CsPbBr3@ZIF-67(1,4)	COMP	Gas	Zn	none	none	CsPbBr3	1.99	0.1125	0	VIS	40	3		20	250	0.5	4.279	CH4
Kong, Zi-Cheng, et al. "Core@ shell CsPbBr3@ zeolitic imidazolate framework nanocomposite for efficient photocatalytic CO2 reduction." ACS Energy Letters 3.11 (2018): 2656-2662.	465	128	CsPbBr3@ZIF-67(1,4)	COMP	Gas	Zn	none	none	CsPbBr3	1.99	0.1125	0	VIS	40	2		20	250	0.5	4.186	CH4
Kong, Zi-Cheng, et al. "Core@ shell CsPbBr3@ zeolitic imidazolate framework nanocomposite for efficient photocatalytic CO2 reduction." ACS Energy Letters 3.11 (2018): 2656-2662.	466	128	CsPbBr3@ZIF-67(1,4)	COMP	Gas	Zn	none	none	CsPbBr3	1.99	0.1125	0	VIS	40	1		20	250	0.5	4.395	CH4
Kong, Zi-Cheng, et al. "Core@ shell CsPbBr3@ zeolitic imidazolate framework nanocomposite for efficient photocatalytic CO2 reduction." ACS Energy Letters 3.11 (2018): 2656-2662.	467	129	CsPbBr3@ZIF-67(1,4)	COMP	Gas	Zn	none	none	CsPbBr3	1.99	0.1125	0	VIS	40	3		20	250	0.5	0.176667	CH4
Kong, Zi-Cheng, et al. "Core@ shell CsPbBr3@ zeolitic imidazolate framework nanocomposite for efficient photocatalytic CO2 reduction." ACS Energy Letters 3.11 (2018): 2656-2662.	468	130	ZIF-8	COMP	Gas	Zn	none	none	none		0.1125	0	VIS	40	3		20	250	0.5	0.920667	CH4
Kong, Zi-Cheng, et al. "Core@ shell CsPbBr3@ zeolitic imidazolate framework nanocomposite for efficient photocatalytic CO2 reduction." ACS Energy Letters 3.11 (2018): 2656-2662.	469	130	ZIF-8	COMP	Gas	Zn	none	none	none		0.1125	0	VIS	40	2		20	250	0.5	0.894	CH4
Kong, Zi-Cheng, et al. "Core@ shell CsPbBr3@ zeolitic imidazolate framework nanocomposite for efficient photocatalytic CO2 reduction." ACS Energy Letters 3.11 (2018): 2656-2662.	470	130	ZIF-8	COMP	Gas	Zn	none	none	none		0.1125	0	VIS	40	1		20	250	0.5	0.959	CH4
Kong, Zi-Cheng, et al. "Core@ shell CsPbBr3@ zeolitic imidazolate framework nanocomposite for efficient photocatalytic CO2 reduction." ACS Energy Letters 3.11 (2018): 2656-2662.	471	131	ZIF-8	COMP	Gas	Zn	none	none	none		0.1125	0	VIS	40	3		20	250	0.5	0.0946667	CH4
Kong, Zi-Cheng, et al. "Core@ shell CsPbBr3@ zeolitic imidazolate framework nanocomposite for efficient photocatalytic CO2 reduction." ACS Energy Letters 3.11 (2018): 2656-2662.	472	132	ZIF-67	COMP	Gas	Zn	none	none	none		0.1125	0	VIS	40	3		20	250	0.5	1.86867	CH4
Kong, Zi-Cheng, et al. "Core@ shell CsPbBr3@ zeolitic imidazolate framework nanocomposite for efficient photocatalytic CO2 reduction." ACS Energy Letters 3.11 (2018): 2656-2662.	473	132	ZIF-67	COMP	Gas	Zn	none	none	none		0.1125	0	VIS	40	2		20	250	0.5	2.01	CH4
Kong, Zi-Cheng, et al. "Core@ shell CsPbBr3@ zeolitic imidazolate framework nanocomposite for efficient photocatalytic CO2 reduction." ACS Energy Letters 3.11 (2018): 2656-2662.	474	132	ZIF-67	COMP	Gas	Zn	none	none	none		0.1125	0	VIS	40	1		20	250	0.5	1.811	CH4
Kong, Zi-Cheng, et al. "Core@ shell CsPbBr3@ zeolitic imidazolate framework nanocomposite for efficient photocatalytic CO2 reduction." ACS Energy Letters 3.11 (2018): 2656-2662.	475	133	ZIF-67	COMP	Gas	Zn	none	none	none		0.1125	0	VIS	40	3		20	250	0.5	0.12	CH4
Wang, Yangang, et al. "Carbothermal activation synthesis of 3D porous g-C3N4/carbon nanosheets composite with superior performance for CO2 photoreduction." Applied Catalysis B: Environmental 239 (2018): 196-203.	476	134	3D g-C3N4/C-NPs	COMP	Gas	none	none	none	g-C3N4	2.7	0.037037	0	UVVIS	2700	7	1.08	30			48.4797	CO
Wang, Yangang, et al. "Carbothermal activation synthesis of 3D porous g-C3N4/carbon nanosheets composite with superior performance for CO2 photoreduction." Applied Catalysis B: Environmental 239 (2018): 196-203.	477	134	3D g-C3N4/C-NPs	COMP	Gas	none	none	none	g-C3N4	2.7	0.037037	0	UVVIS	2700	6	1.08	30			53.5285	CO
Wang, Yangang, et al. "Carbothermal activation synthesis of 3D porous g-C3N4/carbon nanosheets composite with superior performance for CO2 photoreduction." Applied Catalysis B: Environmental 239 (2018): 196-203.	478	134	3D g-C3N4/C-NPs	COMP	Gas	none	none	none	g-C3N4	2.7	0.037037	0	UVVIS	2700	5	1.08	30			60.1284	CO
Wang, Yangang, et al. "Carbothermal activation synthesis of 3D porous g-C3N4/carbon nanosheets composite with superior performance for CO2 photoreduction." Applied Catalysis B: Environmental 239 (2018): 196-203.	479	134	3D g-C3N4/C-NPs	COMP	Gas	none	none	none	g-C3N4	2.7	0.037037	0	UVVIS	2700	4	1.08	30			66.4068	CO
Wang, Yangang, et al. "Carbothermal activation synthesis of 3D porous g-C3N4/carbon nanosheets composite with superior performance for CO2 photoreduction." Applied Catalysis B: Environmental 239 (2018): 196-203.	480	134	3D g-C3N4/C-NPs	COMP	Gas	none	none	none	g-C3N4	2.7	0.037037	0	UVVIS	2700	3	1.08	30			69.2763	CO
Wang, Yangang, et al. "Carbothermal activation synthesis of 3D porous g-C3N4/carbon nanosheets composite with superior performance for CO2 photoreduction." Applied Catalysis B: Environmental 239 (2018): 196-203.	481	134	3D g-C3N4/C-NPs	COMP	Gas	none	none	none	g-C3N4	2.7	0.037037	0	UVVIS	2700	2	1.08	30			70.9785	CO
Wang, Yangang, et al. "Carbothermal activation synthesis of 3D porous g-C3N4/carbon nanosheets composite with superior performance for CO2 photoreduction." Applied Catalysis B: Environmental 239 (2018): 196-203.	482	134	3D g-C3N4/C-NPs	COMP	Gas	none	none	none	g-C3N4	2.7	0.037037	0	UVVIS	2700	1	1.08	30			79.235	CO
Su, Yun, et al. "Cd0. 2Zn0. 8S@ UiO-66-NH2 nanocomposites as efficient and stable visible-light-driven photocatalyst for H2 evolution and CO2 reduction." Applied Catalysis B: Environmental 200 (2017): 448-457.	483	135	CZS@UN10	COMP	Liquid	Zr	none	present	metal	2.27	0.5	0	VIS	100	5	1	20	80	24	4.1	H2
Su, Yun, et al. "Cd0. 2Zn0. 8S@ UiO-66-NH2 nanocomposites as efficient and stable visible-light-driven photocatalyst for H2 evolution and CO2 reduction." Applied Catalysis B: Environmental 200 (2017): 448-457.	484	135	CZS@UN10	COMP	Liquid	Zr	none	present	metal	2.27	0.5	0	VIS	100	4	1	20	80	24	4.6845	H2
Su, Yun, et al. "Cd0. 2Zn0. 8S@ UiO-66-NH2 nanocomposites as efficient and stable visible-light-driven photocatalyst for H2 evolution and CO2 reduction." Applied Catalysis B: Environmental 200 (2017): 448-457.	485	135	CZS@UN10	COMP	Liquid	Zr	none	present	metal	2.27	0.5	0	VIS	100	3	1	20	80	24	5.34867	H2
Su, Yun, et al. "Cd0. 2Zn0. 8S@ UiO-66-NH2 nanocomposites as efficient and stable visible-light-driven photocatalyst for H2 evolution and CO2 reduction." Applied Catalysis B: Environmental 200 (2017): 448-457.	486	135	CZS@UN10	COMP	Liquid	Zr	none	present	metal	2.27	0.5	0	VIS	100	2	1	20	80	24	5.923	H2
Su, Yun, et al. "Cd0. 2Zn0. 8S@ UiO-66-NH2 nanocomposites as efficient and stable visible-light-driven photocatalyst for H2 evolution and CO2 reduction." Applied Catalysis B: Environmental 200 (2017): 448-457.	487	135	CZS@UN10	COMP	Liquid	Zr	none	present	metal	2.27	0.5	0	VIS	100	1	1	20	80	24	6.246	H2
Su, Yun, et al. "Cd0. 2Zn0. 8S@ UiO-66-NH2 nanocomposites as efficient and stable visible-light-driven photocatalyst for H2 evolution and CO2 reduction." Applied Catalysis B: Environmental 200 (2017): 448-457.	488	136	CZS@UN20	COMP	Liquid	Zr	none	present	metal	2.27	0.5	0	VIS	100	5	1	20	80	24	6.8	H2
Su, Yun, et al. "Cd0. 2Zn0. 8S@ UiO-66-NH2 nanocomposites as efficient and stable visible-light-driven photocatalyst for H2 evolution and CO2 reduction." Applied Catalysis B: Environmental 200 (2017): 448-457.	489	136	CZS@UN20	COMP	Liquid	Zr	none	present	metal	2.27	0.5	0	VIS	100	4	1	20	80	24	7.5385	H2
Su, Yun, et al. "Cd0. 2Zn0. 8S@ UiO-66-NH2 nanocomposites as efficient and stable visible-light-driven photocatalyst for H2 evolution and CO2 reduction." Applied Catalysis B: Environmental 200 (2017): 448-457.	490	136	CZS@UN20	COMP	Liquid	Zr	none	present	metal	2.27	0.5	0	VIS	100	3	1	20	80	24	8.29233	H2
Su, Yun, et al. "Cd0. 2Zn0. 8S@ UiO-66-NH2 nanocomposites as efficient and stable visible-light-driven photocatalyst for H2 evolution and CO2 reduction." Applied Catalysis B: Environmental 200 (2017): 448-457.	491	136	CZS@UN20	COMP	Liquid	Zr	none	present	metal	2.27	0.5	0	VIS	100	2	1	20	80	24	9.3155	H2
Su, Yun, et al. "Cd0. 2Zn0. 8S@ UiO-66-NH2 nanocomposites as efficient and stable visible-light-driven photocatalyst for H2 evolution and CO2 reduction." Applied Catalysis B: Environmental 200 (2017): 448-457.	492	136	CZS@UN20	COMP	Liquid	Zr	none	present	metal	2.27	0.5	0	VIS	100	1	1	20	80	24	10.231	H2
Su, Yun, et al. "Cd0. 2Zn0. 8S@ UiO-66-NH2 nanocomposites as efficient and stable visible-light-driven photocatalyst for H2 evolution and CO2 reduction." Applied Catalysis B: Environmental 200 (2017): 448-457.	493	137	CZS@UN30	COMP	Liquid	Zr	none	present	metal	2.27	0.5	0	VIS	100	5	1	20	80	24	5.9	H2
Su, Yun, et al. "Cd0. 2Zn0. 8S@ UiO-66-NH2 nanocomposites as efficient and stable visible-light-driven photocatalyst for H2 evolution and CO2 reduction." Applied Catalysis B: Environmental 200 (2017): 448-457.	494	137	CZS@UN30	COMP	Liquid	Zr	none	present	metal	2.27	0.5	0	VIS	100	4	1	20	80	24	6.35375	H2
Su, Yun, et al. "Cd0. 2Zn0. 8S@ UiO-66-NH2 nanocomposites as efficient and stable visible-light-driven photocatalyst for H2 evolution and CO2 reduction." Applied Catalysis B: Environmental 200 (2017): 448-457.	495	137	CZS@UN30	COMP	Liquid	Zr	none	present	metal	2.27	0.5	0	VIS	100	3	1	20	80	24	6.89233	H2
Su, Yun, et al. "Cd0. 2Zn0. 8S@ UiO-66-NH2 nanocomposites as efficient and stable visible-light-driven photocatalyst for H2 evolution and CO2 reduction." Applied Catalysis B: Environmental 200 (2017): 448-457.	496	137	CZS@UN30	COMP	Liquid	Zr	none	present	metal	2.27	0.5	0	VIS	100	2	1	20	80	24	7.7	H2
Su, Yun, et al. "Cd0. 2Zn0. 8S@ UiO-66-NH2 nanocomposites as efficient and stable visible-light-driven photocatalyst for H2 evolution and CO2 reduction." Applied Catalysis B: Environmental 200 (2017): 448-457.	497	137	CZS@UN30	COMP	Liquid	Zr	none	present	metal	2.27	0.5	0	VIS	100	1	1	20	80	24	8.292	H2
Su, Yun, et al. "Cd0. 2Zn0. 8S@ UiO-66-NH2 nanocomposites as efficient and stable visible-light-driven photocatalyst for H2 evolution and CO2 reduction." Applied Catalysis B: Environmental 200 (2017): 448-457.	498	138	CZS@UN40	COMP	Liquid	Zr	none	present	metal	2.27	0.5	0	VIS	100	5	1	20	80	24	5.3	H2
Su, Yun, et al. "Cd0. 2Zn0. 8S@ UiO-66-NH2 nanocomposites as efficient and stable visible-light-driven photocatalyst for H2 evolution and CO2 reduction." Applied Catalysis B: Environmental 200 (2017): 448-457.	499	138	CZS@UN40	COMP	Liquid	Zr	none	present	metal	2.27	0.5	0	VIS	100	4	1	20	80	24	5.7615	H2
Su, Yun, et al. "Cd0. 2Zn0. 8S@ UiO-66-NH2 nanocomposites as efficient and stable visible-light-driven photocatalyst for H2 evolution and CO2 reduction." Applied Catalysis B: Environmental 200 (2017): 448-457.	500	138	CZS@UN40	COMP	Liquid	Zr	none	present	metal	2.27	0.5	0	VIS	100	3	1	20	80	24	6.282	H2
Su, Yun, et al. "Cd0. 2Zn0. 8S@ UiO-66-NH2 nanocomposites as efficient and stable visible-light-driven photocatalyst for H2 evolution and CO2 reduction." Applied Catalysis B: Environmental 200 (2017): 448-457.	501	138	CZS@UN40	COMP	Liquid	Zr	none	present	metal	2.27	0.5	0	VIS	100	2	1	20	80	24	7	H2
Su, Yun, et al. "Cd0. 2Zn0. 8S@ UiO-66-NH2 nanocomposites as efficient and stable visible-light-driven photocatalyst for H2 evolution and CO2 reduction." Applied Catalysis B: Environmental 200 (2017): 448-457.	502	138	CZS@UN40	COMP	Liquid	Zr	none	present	metal	2.27	0.5	0	VIS	100	1	1	20	80	24	7.431	H2
Su, Yun, et al. "Cd0. 2Zn0. 8S@ UiO-66-NH2 nanocomposites as efficient and stable visible-light-driven photocatalyst for H2 evolution and CO2 reduction." Applied Catalysis B: Environmental 200 (2017): 448-457.	503	139	Cd(0.2) Zn(0.8) S	COMP	Liquid	Zr	none	none	metal	2.06	0.5	0	VIS	100	5	1	20	80	24	2	H2
Su, Yun, et al. "Cd0. 2Zn0. 8S@ UiO-66-NH2 nanocomposites as efficient and stable visible-light-driven photocatalyst for H2 evolution and CO2 reduction." Applied Catalysis B: Environmental 200 (2017): 448-457.	504	139	Cd(0.2) Zn(0.8) S	COMP	Liquid	Zr	none	none	metal	2.06	0.5	0	VIS	100	4	1	20	80	24	2.39625	H2
Su, Yun, et al. "Cd0. 2Zn0. 8S@ UiO-66-NH2 nanocomposites as efficient and stable visible-light-driven photocatalyst for H2 evolution and CO2 reduction." Applied Catalysis B: Environmental 200 (2017): 448-457.	505	139	Cd(0.2) Zn(0.8) S	COMP	Liquid	Zr	none	none	metal	2.06	0.5	0	VIS	100	3	1	20	80	24	2.90767	H2
Su, Yun, et al. "Cd0. 2Zn0. 8S@ UiO-66-NH2 nanocomposites as efficient and stable visible-light-driven photocatalyst for H2 evolution and CO2 reduction." Applied Catalysis B: Environmental 200 (2017): 448-457.	506	139	Cd(0.2) Zn(0.8) S	COMP	Liquid	Zr	none	none	metal	2.06	0.5	0	VIS	100	2	1	20	80	24	3.3385	H2
Su, Yun, et al. "Cd0. 2Zn0. 8S@ UiO-66-NH2 nanocomposites as efficient and stable visible-light-driven photocatalyst for H2 evolution and CO2 reduction." Applied Catalysis B: Environmental 200 (2017): 448-457.	507	139	Cd(0.2) Zn(0.8) S	COMP	Liquid	Zr	none	none	metal	2.06	0.5	0	VIS	100	1	1	20	80	24	3.985	H2
Zhang, Shuquan, et al. "Construction of interpenetrated ruthenium metal–organic frameworks as stable photocatalysts for CO2 reduction." Inorganic chemistry 54.17 (2015): 8375-8379.	508	140	Ru-MOF j (non-interpenetrated)	COMP	Liquid	other	present	none	none		0.634921	4.7619	VIS	100	12	1		100	36	67.1	HCOOH
Zhang, Shuquan, et al. "Construction of interpenetrated ruthenium metal–organic frameworks as stable photocatalysts for CO2 reduction." Inorganic chemistry 54.17 (2015): 8375-8379.	509	141	Ru-MOF j (interpenetrated)	COMP	Liquid	other	present	none	none		0.634921	4.7619	VIS	100	12	1		100	36	71.7	HCOOH
Zhang, Shuquan, et al. "Hierarchical metal–organic framework nanoflowers for effective CO2 transformation driven by visible light." Journal of Materials Chemistry A 3.30 (2015): 15764-15768.	510	142	Ru-MOF I (nanoflower)	COMP	Liquid	other	present	none	none		0.666667	4.7619	VIS	100	8	1	30	100	36	77.2	HCOOH
Zhang, Shuquan, et al. "Hierarchical metal–organic framework nanoflowers for effective CO2 transformation driven by visible light." Journal of Materials Chemistry A 3.30 (2015): 15764-15768.	511	142	Ru-MOF I (nanoflower)	COMP	Liquid	other	present	none	none		0.666667	4.7619	VIS	100	6	1	30	100	36	77.7583	HCOOH
Zhang, Shuquan, et al. "Hierarchical metal–organic framework nanoflowers for effective CO2 transformation driven by visible light." Journal of Materials Chemistry A 3.30 (2015): 15764-15768.	512	142	Ru-MOF I (nanoflower)	COMP	Liquid	other	present	none	none		0.666667	4.7619	VIS	100	4	1	30	100	36	70.425	HCOOH
Zhang, Shuquan, et al. "Hierarchical metal–organic framework nanoflowers for effective CO2 transformation driven by visible light." Journal of Materials Chemistry A 3.30 (2015): 15764-15768.	513	142	Ru-MOF I (nanoflower)	COMP	Liquid	other	present	none	none		0.666667	4.7619	VIS	100	2	1	30	100	36	55.5625	HCOOH
Zhang, Shuquan, et al. "Hierarchical metal–organic framework nanoflowers for effective CO2 transformation driven by visible light." Journal of Materials Chemistry A 3.30 (2015): 15764-15768.	514	143	Ru-MOF i (microcrystals)	COMP	Liquid	other	present	none	none		0.666667	4.7619	VIS	100	8	1	30	100	36	52.7	HCOOH
Zhang, Shuquan, et al. "Hierarchical metal–organic framework nanoflowers for effective CO2 transformation driven by visible light." Journal of Materials Chemistry A 3.30 (2015): 15764-15768.	515	143	Ru-MOF i (microcrystals)	COMP	Liquid	other	present	none	none		0.666667	4.7619	VIS	100	6	1	30	100	36	53.9167	HCOOH
Zhang, Shuquan, et al. "Hierarchical metal–organic framework nanoflowers for effective CO2 transformation driven by visible light." Journal of Materials Chemistry A 3.30 (2015): 15764-15768.	516	143	Ru-MOF i (microcrystals)	COMP	Liquid	other	present	none	none		0.666667	4.7619	VIS	100	4	1	30	100	36	45.3875	HCOOH
Zhang, Shuquan, et al. "Hierarchical metal–organic framework nanoflowers for effective CO2 transformation driven by visible light." Journal of Materials Chemistry A 3.30 (2015): 15764-15768.	517	143	Ru-MOF i (microcrystals)	COMP	Liquid	other	present	none	none		0.666667	4.7619	VIS	100	2	1	30	100	36	41.2625	HCOOH
Zhang, Shuquan, et al. "Hierarchical metal–organic framework nanoflowers for effective CO2 transformation driven by visible light." Journal of Materials Chemistry A 3.30 (2015): 15764-15768.	518	143	Ru-MOF i (bulk)	COMP	Liquid	other	present	none	none		0.666667	4.7619	VIS	100	8	1	30	100	36	30.8125	HCOOH
Zhang, Shuquan, et al. "Hierarchical metal–organic framework nanoflowers for effective CO2 transformation driven by visible light." Journal of Materials Chemistry A 3.30 (2015): 15764-15768.	519	143	Ru-MOF i (bulk)	COMP	Liquid	other	present	none	none		0.666667	4.7619	VIS	100	6	1	30	100	36	28.6083	HCOOH
Zhang, Shuquan, et al. "Hierarchical metal–organic framework nanoflowers for effective CO2 transformation driven by visible light." Journal of Materials Chemistry A 3.30 (2015): 15764-15768.	520	143	Ru-MOF i (bulk)	COMP	Liquid	other	present	none	none		0.666667	4.7619	VIS	100	4	1	30	100	36	26.1313	HCOOH
Zhang, Shuquan, et al. "Hierarchical metal–organic framework nanoflowers for effective CO2 transformation driven by visible light." Journal of Materials Chemistry A 3.30 (2015): 15764-15768.	521	143	Ru-MOF i (bulk)	COMP	Liquid	other	present	none	none		0.666667	4.7619	VIS	100	2	1	30	100	36	30.2625	HCOOH
Wang, Sibo, Jinliang Lin, and Xinchen Wang. "Semiconductor–redox catalysis promoted by metal–organic frameworks for CO 2 reduction." Physical Chemistry Chemical Physics 16.28 (2014): 14656-14660.	522	144	Co-ZIF-9/g-C3N4	COMP	Liquid	Co	none	none	g-C3N4		3.33333	16.6667	VIS	80	2	1	10	235	48	366.075	CO
Wang, Sibo, Jinliang Lin, and Xinchen Wang. "Semiconductor–redox catalysis promoted by metal–organic frameworks for CO 2 reduction." Physical Chemistry Chemical Physics 16.28 (2014): 14656-14660.	523	144	Co-ZIF-9/g-C3N4	COMP	Liquid	Co	none	none	g-C3N4		3.33333	16.6667	VIS	80	2	1	20	235	48	504.725	CO
Wang, Sibo, Jinliang Lin, and Xinchen Wang. "Semiconductor–redox catalysis promoted by metal–organic frameworks for CO 2 reduction." Physical Chemistry Chemical Physics 16.28 (2014): 14656-14660.	524	144	Co-ZIF-9/g-C3N4	COMP	Liquid	Co	none	none	g-C3N4		3.33333	16.6667	VIS	80	2	1	30	235	48	573.6	CO
Wang, Sibo, Jinliang Lin, and Xinchen Wang. "Semiconductor–redox catalysis promoted by metal–organic frameworks for CO 2 reduction." Physical Chemistry Chemical Physics 16.28 (2014): 14656-14660.	525	144	Co-ZIF-9/g-C3N4	COMP	Liquid	Co	none	none	g-C3N4		3.33333	16.6667	VIS	80	2	1	40	235	48	753	CO
Wang, Sibo, Jinliang Lin, and Xinchen Wang. "Semiconductor–redox catalysis promoted by metal–organic frameworks for CO 2 reduction." Physical Chemistry Chemical Physics 16.28 (2014): 14656-14660.	526	144	Co-ZIF-9/g-C3N4	COMP	Liquid	Co	none	none	g-C3N4		3.33333	16.6667	VIS	80	2	1	50	235	48	650.2	CO
Wang, Sibo, Jinliang Lin, and Xinchen Wang. "Semiconductor–redox catalysis promoted by metal–organic frameworks for CO 2 reduction." Physical Chemistry Chemical Physics 16.28 (2014): 14656-14660.	527	144	Co-ZIF-9/g-C3N4	COMP	Liquid	Co	none	none	g-C3N4		3.33333	16.6667	VIS	80	2	1	60	235	48	541.9	CO
Li, Rui, et al. "Integration of an inorganic semiconductor with a metal–organic framework: a platform for enhanced gaseous photocatalytic reactions." Advanced Materials 26.28 (2014): 4783-4788.	528	145	Cu3(BTC)2@TiO2	COMP	Gas	other	none	none	g-C3N4	3.2	60	0	UV	100			40	180	12	2.64	CH4
Li, Lina, et al. "Effective visible-light driven CO 2 photoreduction via a promising bifunctional iridium coordination polymer." Chemical Science 5.10 (2014): 3808-3813.	529	146	Ir-CP	COMP	Liquid	other	present	none	none		0.634921	4.7619	VIS	60	6	1	30	180	24	158.3	HCOOH
Li, Lina, et al. "Effective visible-light driven CO 2 photoreduction via a promising bifunctional iridium coordination polymer." Chemical Science 5.10 (2014): 3808-3813.	530	146	Ir-CP	COMP	Liquid	other	present	none	none		0.634921	4.7619	VIS	60	5	1	30	180	24	145.785	HCOOH
Li, Lina, et al. "Effective visible-light driven CO 2 photoreduction via a promising bifunctional iridium coordination polymer." Chemical Science 5.10 (2014): 3808-3813.	531	146	Ir-CP	COMP	Liquid	other	present	none	none		0.634921	4.7619	VIS	60	4	1	30	180	24	121.987	HCOOH
Li, Lina, et al. "Effective visible-light driven CO 2 photoreduction via a promising bifunctional iridium coordination polymer." Chemical Science 5.10 (2014): 3808-3813.	532	146	Ir-CP	COMP	Liquid	other	present	none	none		0.634921	4.7619	VIS	60	3	1	30	180	24	109.1	HCOOH
Li, Lina, et al. "Effective visible-light driven CO 2 photoreduction via a promising bifunctional iridium coordination polymer." Chemical Science 5.10 (2014): 3808-3813.	533	146	Ir-CP	COMP	Liquid	other	present	none	none		0.634921	4.7619	VIS	60	2	1	30	180	24	93.375	HCOOH
Li, Lina, et al. "Effective visible-light driven CO 2 photoreduction via a promising bifunctional iridium coordination polymer." Chemical Science 5.10 (2014): 3808-3813.	534	146	Ir-CP	COMP	Liquid	other	present	none	none		0.634921	4.7619	VIS	60	1	1	30	180	24	76.3	HCOOH
Li, Lina, et al. "Effective visible-light driven CO 2 photoreduction via a promising bifunctional iridium coordination polymer." Chemical Science 5.10 (2014): 3808-3813.	535	147	Ir(ppy)2(hdcbpy)	COMP	Liquid	other	present	none	none		0.634921	4.7619	VIS	60	6	1	30	180	24	107.762	HCOOH
Li, Lina, et al. "Effective visible-light driven CO 2 photoreduction via a promising bifunctional iridium coordination polymer." Chemical Science 5.10 (2014): 3808-3813.	536	147	Ir(ppy)2(hdcbpy)	COMP	Liquid	other	present	none	none		0.634921	4.7619	VIS	60	5	1	30	180	24	120.885	HCOOH
Li, Lina, et al. "Effective visible-light driven CO 2 photoreduction via a promising bifunctional iridium coordination polymer." Chemical Science 5.10 (2014): 3808-3813.	537	147	Ir(ppy)2(hdcbpy)	COMP	Liquid	other	present	none	none		0.634921	4.7619	VIS	60	4	1	30	180	24	140.562	HCOOH
Li, Lina, et al. "Effective visible-light driven CO 2 photoreduction via a promising bifunctional iridium coordination polymer." Chemical Science 5.10 (2014): 3808-3813.	538	147	Ir(ppy)2(hdcbpy)	COMP	Liquid	other	present	none	none		0.634921	4.7619	VIS	60	3	1	30	180	24	152.608	HCOOH
Li, Lina, et al. "Effective visible-light driven CO 2 photoreduction via a promising bifunctional iridium coordination polymer." Chemical Science 5.10 (2014): 3808-3813.	539	147	Ir(ppy)2(hdcbpy)	COMP	Liquid	other	present	none	none		0.634921	4.7619	VIS	60	2	1	30	180	24	156.625	HCOOH
Li, Lina, et al. "Effective visible-light driven CO 2 photoreduction via a promising bifunctional iridium coordination polymer." Chemical Science 5.10 (2014): 3808-3813.	540	147	Ir(ppy)2(hdcbpy)	COMP	Liquid	other	present	none	none		0.634921	4.7619	VIS	60	1	1	30	180	24	186.75	HCOOH
Shen, Lijuan, et al. "A clean and general strategy to decorate a titanium metal–organic framework with noble-metal nanoparticles for versatile photocatalytic applications." Inorganic Chemistry 54.4 (2015): 1191-1193.	541	148	Blank MIL-125(Ti)	PURE	Liquid	other	none	none	none		0.625	10	VIS		5	1	25	150	20	16	H2
Shen, Lijuan, et al. "A clean and general strategy to decorate a titanium metal–organic framework with noble-metal nanoparticles for versatile photocatalytic applications." Inorganic Chemistry 54.4 (2015): 1191-1193.	542	148	Blank MIL-125(Ti)	PURE	Liquid	other	none	none	none		0.625	10	VIS		4	1	25	150	20	16.71	H2
Shen, Lijuan, et al. "A clean and general strategy to decorate a titanium metal–organic framework with noble-metal nanoparticles for versatile photocatalytic applications." Inorganic Chemistry 54.4 (2015): 1191-1193.	543	148	Blank MIL-125(Ti)	PURE	Liquid	other	none	none	none		0.625	10	VIS		3	1	25	150	20	9.82667	H2
Shen, Lijuan, et al. "A clean and general strategy to decorate a titanium metal–organic framework with noble-metal nanoparticles for versatile photocatalytic applications." Inorganic Chemistry 54.4 (2015): 1191-1193.	544	148	Blank MIL-125(Ti)	PURE	Liquid	other	none	none	none		0.625	10	VIS		2	1	25	150	20	2.95	H2
Shen, Lijuan, et al. "A clean and general strategy to decorate a titanium metal–organic framework with noble-metal nanoparticles for versatile photocatalytic applications." Inorganic Chemistry 54.4 (2015): 1191-1193.	545	148	Blank MIL-125(Ti)	PURE	Liquid	other	none	none	none		0.625	10	VIS		1	1	25	150	20	4	H2
Shen, Lijuan, et al. "A clean and general strategy to decorate a titanium metal–organic framework with noble-metal nanoparticles for versatile photocatalytic applications." Inorganic Chemistry 54.4 (2015): 1191-1193.	546	149	Pt/MIL-125(Ti)-Pd	COMP	Liquid	other	present	none	metal		0.625	10	VIS		5	1	25			80	H2
Shen, Lijuan, et al. "A clean and general strategy to decorate a titanium metal–organic framework with noble-metal nanoparticles for versatile photocatalytic applications." Inorganic Chemistry 54.4 (2015): 1191-1193.	547	149	Pt/MIL-125(Ti)-Pd	COMP	Liquid	other	present	none	metal		0.625	10	VIS		4	1	25			76.66	H2
Shen, Lijuan, et al. "A clean and general strategy to decorate a titanium metal–organic framework with noble-metal nanoparticles for versatile photocatalytic applications." Inorganic Chemistry 54.4 (2015): 1191-1193.	548	149	Pt/MIL-125(Ti)-Pd	COMP	Liquid	other	present	none	metal		0.625	10	VIS		3	1	25			68.14	H2
Shen, Lijuan, et al. "A clean and general strategy to decorate a titanium metal–organic framework with noble-metal nanoparticles for versatile photocatalytic applications." Inorganic Chemistry 54.4 (2015): 1191-1193.	549	149	Pt/MIL-125(Ti)-Pd	COMP	Liquid	other	present	none	metal		0.625	10	VIS		2	1	25			62.9	H2
Shen, Lijuan, et al. "A clean and general strategy to decorate a titanium metal–organic framework with noble-metal nanoparticles for versatile photocatalytic applications." Inorganic Chemistry 54.4 (2015): 1191-1193.	550	149	Pt/MIL-125(Ti)-Pd	COMP	Liquid	other	present	none	metal		0.625	10	VIS		1	1	25			47.18	H2
Shen, Lijuan, et al. "A clean and general strategy to decorate a titanium metal–organic framework with noble-metal nanoparticles for versatile photocatalytic applications." Inorganic Chemistry 54.4 (2015): 1191-1193.	551	150	Pt/MIL-125(Ti)	COMP	Liquid	other	present	none	metal		0.625	10	VIS		5	1	25			154.72	H2
Shen, Lijuan, et al. "A clean and general strategy to decorate a titanium metal–organic framework with noble-metal nanoparticles for versatile photocatalytic applications." Inorganic Chemistry 54.4 (2015): 1191-1193.	552	150	Pt/MIL-125(Ti)	COMP	Liquid	other	present	none	metal		0.625	10	VIS		4	1	25			133.17	H2
Shen, Lijuan, et al. "A clean and general strategy to decorate a titanium metal–organic framework with noble-metal nanoparticles for versatile photocatalytic applications." Inorganic Chemistry 54.4 (2015): 1191-1193.	553	150	Pt/MIL-125(Ti)	COMP	Liquid	other	present	none	metal		0.625	10	VIS		3	1	25			128.42	H2
Shen, Lijuan, et al. "A clean and general strategy to decorate a titanium metal–organic framework with noble-metal nanoparticles for versatile photocatalytic applications." Inorganic Chemistry 54.4 (2015): 1191-1193.	554	150	Pt/MIL-125(Ti)	COMP	Liquid	other	present	none	metal		0.625	10	VIS		2	1	25			117.94	H2
Shen, Lijuan, et al. "A clean and general strategy to decorate a titanium metal–organic framework with noble-metal nanoparticles for versatile photocatalytic applications." Inorganic Chemistry 54.4 (2015): 1191-1193.	555	150	Pt/MIL-125(Ti)	COMP	Liquid	other	present	none	metal		0.625	10	VIS		1	1	25			108.1	H2
Wang, Jichong, et al. "Direct Z-scheme 0D/2D heterojunction of CsPbBr3 quantum dots/Bi2WO6 nanosheets for efficient photocatalytic CO2 reduction." ACS applied materials & interfaces 12.28 (2020): 31477-31485.	556	151	CBP/BWO-10	COMP	Gas	none	none	none	Bi2WO6	2.36		0	VIS		10		25	50	2	25	CO
Men, Yu-Long, et al. "Selective CO evolution from photoreduction of CO2 on a metal-carbide-based composite catalyst." Journal of the American Chemical Society 140.40 (2018): 13071-13077.	557	152	CM0.1	COMP	Liquid	none	none	none	none	2.39	1	10	VIS	400	1	1	25	180	16	236	H2
Men, Yu-Long, et al. "Selective CO evolution from photoreduction of CO2 on a metal-carbide-based composite catalyst." Journal of the American Chemical Society 140.40 (2018): 13071-13077.	558	153	CM0.3	COMP	Liquid	none	none	none	none	2.39	1	10	VIS	400	1	1	25	180	16	667	H2
Men, Yu-Long, et al. "Selective CO evolution from photoreduction of CO2 on a metal-carbide-based composite catalyst." Journal of the American Chemical Society 140.40 (2018): 13071-13077.	559	154	CM0.5	COMP	Liquid	none	none	none	none	2.39	1	10	VIS	400	1	1	25	180	16	901	H2
Men, Yu-Long, et al. "Selective CO evolution from photoreduction of CO2 on a metal-carbide-based composite catalyst." Journal of the American Chemical Society 140.40 (2018): 13071-13077.	560	155	CM0.8	COMP	Liquid	none	none	none	none	2.39	1	10	VIS	400	1	1	25	180	16	727	H2
Men, Yu-Long, et al. "Selective CO evolution from photoreduction of CO2 on a metal-carbide-based composite catalyst." Journal of the American Chemical Society 140.40 (2018): 13071-13077.	561	156	CM1.2	COMP	Liquid	none	none	none	none	2.39	1	10	VIS	400	1	1	25	180	16	539	H2
Men, Yu-Long, et al. "Selective CO evolution from photoreduction of CO2 on a metal-carbide-based composite catalyst." Journal of the American Chemical Society 140.40 (2018): 13071-13077.	562	157	CM2	COMP	Liquid	none	none	none	none	2.39	1	10	VIS	400	1	1	25	180	16	411	H2
Men, Yu-Long, et al. "Selective CO evolution from photoreduction of CO2 on a metal-carbide-based composite catalyst." Journal of the American Chemical Society 140.40 (2018): 13071-13077.	563	158	CM5	COMP	Liquid	none	none	none	none	2.39	1	10	VIS	400	1	1	25	180	16	320	H2
Men, Yu-Long, et al. "Selective CO evolution from photoreduction of CO2 on a metal-carbide-based composite catalyst." Journal of the American Chemical Society 140.40 (2018): 13071-13077.	564	159	CM8	COMP	Liquid	none	none	none	none	2.39	1	10	VIS	400	1	1	25	180	16	305	H2
Men, Yu-Long, et al. "Selective CO evolution from photoreduction of CO2 on a metal-carbide-based composite catalyst." Journal of the American Chemical Society 140.40 (2018): 13071-13077.	565	160	CM12	COMP	Liquid	none	none	none	none	2.39	1	10	VIS	400	1	1	25	180	16	292	H2
Men, Yu-Long, et al. "Selective CO evolution from photoreduction of CO2 on a metal-carbide-based composite catalyst." Journal of the American Chemical Society 140.40 (2018): 13071-13077.	566	161	CdS/Pt	COMP	Liquid	none	present	none	CdS		1	10	VIS	400	1	1	25			373	H2
Que, Meidan, et al. "Anchoring of formamidinium lead bromide quantum dots on Ti3C2 nanosheets for efficient photocatalytic reduction of CO2." ACS Applied Materials & Interfaces 13.5 (2021): 6180-6187.	567	162	FAPbBr3/0.0-Ti3C2	COMP	Gas	none	none	none	Ti3C2	2.16	0.075	0	VIS	40	3	1		120	1	158.87	CO
Que, Meidan, et al. "Anchoring of formamidinium lead bromide quantum dots on Ti3C2 nanosheets for efficient photocatalytic reduction of CO2." ACS Applied Materials & Interfaces 13.5 (2021): 6180-6187.	568	163	FAPbBr3/0.2-Ti3C2	COMP	Gas	none	none	none	Ti3C2	1.91	0.075	0	VIS	40	3	1		120	1	305.59	CO
Que, Meidan, et al. "Anchoring of formamidinium lead bromide quantum dots on Ti3C2 nanosheets for efficient photocatalytic reduction of CO2." ACS Applied Materials & Interfaces 13.5 (2021): 6180-6187.	569	164	FAPbBr3/0.5-Ti3C2	COMP	Gas	none	none	none	Ti3C2	1.91	0.075	0	VIS	40	3	1		120	1	181.29	CO
Que, Meidan, et al. "Anchoring of formamidinium lead bromide quantum dots on Ti3C2 nanosheets for efficient photocatalytic reduction of CO2." ACS Applied Materials & Interfaces 13.5 (2021): 6180-6187.	570	165	FAPbBr3/1.0-Ti3C2	COMP	Gas	none	none	none	Ti3C2	1.91	0.075	0	VIS	40	3	1		120	1	179.44	CO
Su, Ke, et al. "In situ coating CsPbBr3 nanocrystals with graphdiyne to boost the activity and stability of photocatalytic CO2 reduction." ACS Applied Materials & Interfaces 12.45 (2020): 50464-50471.	571	166	CsPbBr3	COMP	Liquid	none	none	none	none	2.36	0.6	0	VIS	17		1		150	0.5	3.3	CO
Su, Ke, et al. "In situ coating CsPbBr3 nanocrystals with graphdiyne to boost the activity and stability of photocatalytic CO2 reduction." ACS Applied Materials & Interfaces 12.45 (2020): 50464-50471.	572	167	CsPbBr3@GDY0.3	COMP	Liquid	none	none	none	metal	2.37	0.6	0	VIS	17		1		150	0.5	10.2	CO
Su, Ke, et al. "In situ coating CsPbBr3 nanocrystals with graphdiyne to boost the activity and stability of photocatalytic CO2 reduction." ACS Applied Materials & Interfaces 12.45 (2020): 50464-50471.	573	168	CsPbBr3@GDY0.3-Co	COMP	Liquid	none	none	none	metal	2.37	0.6	0	VIS	17		1		150	0.5	27.7	CO
Su, Ke, et al. "In situ coating CsPbBr3 nanocrystals with graphdiyne to boost the activity and stability of photocatalytic CO2 reduction." ACS Applied Materials & Interfaces 12.45 (2020): 50464-50471.	574	169	CsPbBr3	COMP	Liquid	none	none	none	none	2.37	4.2	0	VIS	17		1		150	0.5	3	CO
Su, Ke, et al. "In situ coating CsPbBr3 nanocrystals with graphdiyne to boost the activity and stability of photocatalytic CO2 reduction." ACS Applied Materials & Interfaces 12.45 (2020): 50464-50471.	575	170	CsPbBr3@GDY0.3	COMP	Liquid	none	none	none	metal	2.37	4.2	0	VIS	17		1		150	0.5	9.8	CO
Su, Ke, et al. "In situ coating CsPbBr3 nanocrystals with graphdiyne to boost the activity and stability of photocatalytic CO2 reduction." ACS Applied Materials & Interfaces 12.45 (2020): 50464-50471.	576	171	CsPbBr3@GDY0.3-Co	COMP	Liquid	none	none	none	metal	2.37	4.2	0	VIS	17		1		150	0.5	25	CO
Wang, Jichong, et al. "Direct Z-scheme 0D/2D heterojunction of CsPbBr3 quantum dots/Bi2WO6 nanosheets for efficient photocatalytic CO2 reduction." ACS applied materials & interfaces 12.28 (2020): 31477-31485.	577	172	BiWO6	COMP	Gas	none	none	none	none	2.73		0	VIS		10		25	120	24	4	H2
Xie, Shijie, et al. "Facilitated Photocatalytic CO2 Reduction in Aerobic Environment on a Copper‐Porphyrin Metal–Organic Framework." Angewandte Chemie International Edition 62.10 (2023): e202216717.	578	173	Cu-ZnTCPP/g-C3N4	COMP	Gas	Zn	none	none	g-C3N4, metal		0.83	60	UVVIS	100	8		20	90	4	3.3	CO
Wang, Tong, et al. "A viologen-functionalized metal–organic framework for efficient CO 2 photoreduction reaction." Chemical Communications 58.54 (2022): 7507-7510.	579	174	MIL-125-NH2	FUNC	Liquid	other	none	present	none	2.47	0.83	60	VIS	50	10		30	120	38	7.31	HCOOH
Wang, Tong, et al. "A viologen-functionalized metal–organic framework for efficient CO 2 photoreduction reaction." Chemical Communications 58.54 (2022): 7507-7510.	580	175	MIL-125-RV+2	FUNC	Liquid	other	none	none	nonmetal	2.14	0.83	60	VIS	50	10		30		24	12.13	HCOOH
Lai, Gui-Qi, et al. "A ferrocene-modified stable metal–organic framework for efficient CO 2 photoreduction reaction." Chemical Communications 59.83 (2023): 12471-12474.	581	176	FC@MIL-125- NH2 (Ti)	FUNC	Liquid	other	none	present	metal	1.82	0.17	6	UV		10		25	25	18	293.4	HCOOH
Lai, Gui-Qi, et al. "A ferrocene-modified stable metal–organic framework for efficient CO 2 photoreduction reaction." Chemical Communications 59.83 (2023): 12471-12474.	582	176	FC@MIL-125- NH2 (Ti)	FUNC	Liquid	other	none	present	metal	1.82	0.17	6	VIS		10		25	25	18	266.33	HCOOH
Lai, Gui-Qi, et al. "A ferrocene-modified stable metal–organic framework for efficient CO 2 photoreduction reaction." Chemical Communications 59.83 (2023): 12471-12474.	583	177	MIL-125- NH2 (Ti)	PURE	Liquid	other	none	present	metal	1.92	0.17	6	VIS		10		25	150	72	67.33	HCOOH
Lai, Gui-Qi, et al. "A ferrocene-modified stable metal–organic framework for efficient CO 2 photoreduction reaction." Chemical Communications 59.83 (2023): 12471-12474.	584	177	MIL-125- NH2 (Ti)	PURE	Liquid	other	none	present	metal	1.92	0.17	6	UV		10		25	150	72	151.6	HCOOH
He, Xiaoyu, et al. "Dual-optimization strategy engineered Ti-based metal-organic framework with Fe active sites for highly-selective CO2 photoreduction to formic acid." Applied Catalysis B: Environmental 327 (2023): 122418.	585	178	Ti-BPDC	PURE	Liquid	other	none	none	none	2.8	0.83	50	VIS	46			25	150	72	184.9	HCOOH
He, Xiaoyu, et al. "Dual-optimization strategy engineered Ti-based metal-organic framework with Fe active sites for highly-selective CO2 photoreduction to formic acid." Applied Catalysis B: Environmental 327 (2023): 122418.	586	179	Fe/Ti-BPDC	FUNC	Liquid	other	none	none	metal	1.77	0.83	50	VIS	46			25	150	72	709.9	HCOOH
Zhang, An-An, et al. "Post-modification of metal-organic framework for improved CO2 photoreduction efficiency." Chinese Chemical Letters 34.3 (2023): 107311.	587	180	Co2Cl2(BBTA) (H2O)2	PURE	Gas	Co	none	none	nonmetal	2.8	1.66	0	VIS	470	10	0.6	25	70	72	2.53	CO
Zhang, An-An, et al. "Post-modification of metal-organic framework for improved CO2 photoreduction efficiency." Chinese Chemical Letters 34.3 (2023): 107311.	588	180	Co2(OH)2(BBTA) (H2O)2	EXCH	Gas	Co	none	none	OH	2.5	1.66	0	VIS	470	10	0.6	25	25	72	11.8	CH4
Huang, Qianqian, et al. "The effects of local environment towards yield and selectivity on photocatalytic CO2 reduction catalyzed by metal-organic framework." Chinese Chemical Letters (2023): 108517.	589	181	PCN-601	PURE	Liquid	other	none	none	none	1.77	0.087	0	UVVIS	10	10	0.8	15	75	96	33.5	HCOOH
Huang, Qianqian, et al. "The effects of local environment towards yield and selectivity on photocatalytic CO2 reduction catalyzed by metal-organic framework." Chinese Chemical Letters (2023): 108517.	590	182	MAF-X27-OH	EXCH	Liquid	Co	none	none	OH	1.9	0.087	0	UVVIS	10	10	0.8	15	70	72	91.4	HCOOH
Huang, Qianqian, et al. "The effects of local environment towards yield and selectivity on photocatalytic CO2 reduction catalyzed by metal-organic framework." Chinese Chemical Letters (2023): 108517.	591	183	MIL-125-NH2	FUNC	Liquid	other	none	present	none	2.44	0.087	0	UVVIS	10	10	0.8	15	150	24	11.03	HCOOH
Huang, Qianqian, et al. "The effects of local environment towards yield and selectivity on photocatalytic CO2 reduction catalyzed by metal-organic framework." Chinese Chemical Letters (2023): 108517.	592	184	MIL-100(Fe)	PURE	Liquid	other	none	none	metal	2.55	0.087	0	UVVIS	10	10	0.8	15	150	144	6.3	HCOOH
Huang, Qianqian, et al. "The effects of local environment towards yield and selectivity on photocatalytic CO2 reduction catalyzed by metal-organic framework." Chinese Chemical Letters (2023): 108517.	593	185	PCN-601	PURE	Gas	other	none	none	none	1.77	0.087	0	UVVIS	10	10	0.8	15	75	96	10	CH4
Huang, Qianqian, et al. "The effects of local environment towards yield and selectivity on photocatalytic CO2 reduction catalyzed by metal-organic framework." Chinese Chemical Letters (2023): 108517.	594	186	MAF-X27-OH	EXCH	Gas	Co	none	none	OH	1.9	0.087	0	UVVIS	10	10	0.8	15	70	72	1.82	CO
Huang, Qianqian, et al. "The effects of local environment towards yield and selectivity on photocatalytic CO2 reduction catalyzed by metal-organic framework." Chinese Chemical Letters (2023): 108517.	595	187	MIL-125-NH2	FUNC	Gas	other	none	present	none	2.44	0.087	0	UVVIS	10	10	0.8	15	150	24	1.15	CO
Huang, Qianqian, et al. "The effects of local environment towards yield and selectivity on photocatalytic CO2 reduction catalyzed by metal-organic framework." Chinese Chemical Letters (2023): 108517.	596	188	MIL-100(Fe)	PURE	Gas	other	none	none	metal	2.55	0.087	0	UVVIS	46	10	0.8	15	150	144	0.55	CO
Shi, Hainan, et al. "Engineering unsaturated coordination of conductive TiOx clusters derived from Metal–Organic–Framework incorporated into hollow semiconductor for highly selective CO2 photoreduction." Chemical Engineering Journal 440 (2022): 135735.	597	189	MIL-125-NH2 (Ti)	PURE	Gas	other	none	present	metal		0.5	66	VIS	46			25	150	24	1100	CO
Shi, Hainan, et al. "Engineering unsaturated coordination of conductive TiOx clusters derived from Metal–Organic–Framework incorporated into hollow semiconductor for highly selective CO2 photoreduction." Chemical Engineering Journal 440 (2022): 135735.	598	190	ZnIn2Sn4/MIL-125-NH2 (Ti)	COMP	Gas	other	none	present	ZnIn2S4	2.12	0.5	66	VIS	46			25	150	24	1252	CO
Manna, Radhapada, Sibsankar Rahut, and Amar Nath Samanta. "Synergistic effect of Zn2GeO4 nanorod decorated metal organic framework ZIF-67 and its metal ligand charge transfer effect towards the photocatalytic CO2 reduction and C–C coupling." Materials Today Energy 35 (2023): 101326.	599	191	ZIF-67	PURE	Liquid	Co	none	none	none	2.02	0.5	0	UVVIS	400	8		30	25	24	46.73	CH3OH
Manna, Radhapada, Sibsankar Rahut, and Amar Nath Samanta. "Synergistic effect of Zn2GeO4 nanorod decorated metal organic framework ZIF-67 and its metal ligand charge transfer effect towards the photocatalytic CO2 reduction and C–C coupling." Materials Today Energy 35 (2023): 101326.	600	192	Zn2GeO4/ZIF-67	COMP	Liquid	Co	none	none	Zn2GeO4	2.005	0.5	0	UVVIS	400	8		30	25	24	73.82	CH3OH
Liu, Hai‐Xiong, et al. "Efficient CO2 photoreduction enabled by the energy transfer pathway in metal‐organic framework." Aggregate (2023): e383.	601	193	NU-1000	PURE	Gas	Zr	none	none	none	2.1	0.08	5	VIS	400	10	1	10	120	48	4.31	CO
Liu, Hai‐Xiong, et al. "Efficient CO2 photoreduction enabled by the energy transfer pathway in metal‐organic framework." Aggregate (2023): e383.	602	194	TCPP(Co)@NU-1000	FUNC	Gas	Zr	none	none	nonmetal	1.79	0.08	5	VIS	400	10	1	10	120	48	1314	CO
Karmakar, Sanchita, et al. "Confining charge-transfer complex in a metal-organic framework for photocatalytic CO2 reduction in water." Nature Communications 14.1 (2023): 4508.	603	195	MOF-808-PBA-MV	FUNC	Liquid	Zr	none	none	nonmetal	1.93			VIS		16			60	480	460	CH4
Qin, Jian-Hua, et al. "Anionic porous Zn-Metalated porphyrin metal–organic framework with PtS topology for gas-phase photocatalytic CO2 reduction." Inorganic Chemistry 61.34 (2022): 13234-13238.	604	196	[BMI]2[Zn(Zn-TCPP)]·2H2O	FUNC	Gas	Zn	none	none	nonmetal			0	VIS		18	0.8	20	110	72	46	CH4
Yang, Ou-Yang, et al. "Dye-anchoring strategy with a metal–organic framework for a highly efficient visible-light-driven photocatalytic CO2 reduction through the solid–gas mode." ACS Applied Energy Materials 6.1 (2022): 334-341.	605	197	RhB@Zr-MOF	FUNC	Gas	Zr	none	none	nonmetal	2.47		0	VIS	120	4			120	24	10	CO
